# Supplementary material for: Pointing models for the Calar Alto 2.2 m and 3.5 m telescopes
Source: Royal Society of Chemistry journal article supplement (doi:10.1039/c6ob01726f), 1991-11-01

## Electronic Supplementary Information

### Structure–activity studies of non-steroid analogues structurally-related to neuroprotective estrogens<sup>†</sup>

Mingxing Qian,<sup>a</sup> Elizabeth B. Engler-Chiurazzi,<sup>b</sup> Sara E. Lewis,<sup>b</sup> Nigam P. Rath,<sup>c</sup>

James W. Simpkins,<sup>b</sup> and Douglas F. Covey<sup>\*,a,d,e</sup>

<sup>a</sup>*Department of Developmental Biology, Campus Box 8103, Washington University in St. Louis, School of Medicine, 660 S. Euclid Ave., St. Louis, MO, 63110, USA. Email: [dcovey@wustl.edu](mailto:dcovey@wustl.edu); Fax: +1 314 362 7058; Tele: +1 314-362 1726*

<sup>b</sup>*Center for Basic and Translational Stroke Research, West Virginia University, Morgantown, WV 26506, USA*

<sup>c</sup>*Department of Chemistry and Biochemistry and Center for Nanoscience, University of Missouri–St. Louis, St. Louis, MO, 63121, USA*

<sup>d</sup>*Department of Anesthesiology, Washington University School of Medicine, St. Louis, MO, 63110, USA*

<sup>e</sup>*Department of Psychiatry, Washington University School of Medicine, St. Louis MO, 63110.*

Copies of <sup>1</sup>H and <sup>13</sup>C NMR spectra for compounds 27 to 59.

2143

2143-2

300mg minor

| INDEX | FREQUENCY | PPM   | HEIGHT |
|-------|-----------|-------|--------|-------|-----------|-------|--------|-------|-----------|-------|--------|-------|-----------|-------|--------|
| 1     | 2178.345  | 7.260 | 4.9    | 40    | 536.998   | 1.790 | 6.7    | 79    | 282.623   | 0.942 | 10.5   | 80    | 269.987   | 0.900 | 10.6   |
| 2     | 1734.975  | 5.782 | 15.6   | 41    | 532.328   | 1.774 | 9.9    | 81    | 263.669   | 0.879 | 9.3    | 82    | 258.175   | 0.860 | 13.7   |
| 3     | 1188.867  | 3.962 | 3.0    | 42    | 528.757   | 1.762 | 9.4    | 83    | 256.252   | 0.854 | 14.3   | 84    | 254.054   | 0.847 | 7.8    |
| 4     | 1187.493  | 3.958 | 3.1    | 43    | 519.966   | 1.733 | 9.3    | 85    | 251.307   | 0.838 | 7.3    | 86    | 248.835   | 0.829 | 8.9    |
| 5     | 1183.098  | 3.943 | 3.1    | 44    | 516.120   | 1.720 | 9.1    | 87    | 244.989   | 0.817 | 11.5   | 88    | 230.430   | 0.768 | 100.0  |
| 6     | 1181.724  | 3.938 | 3.1    | 45    | 495.243   | 1.651 | 4.5    | 89    | 221.090   | 0.737 | 8.9    |       |           |       |        |
| 7     | 1101.786  | 3.672 | 6.7    | 46    | 489.749   | 1.632 | 6.0    |       |           |       |        |       |           |       |        |
| 8     | 1094.094  | 3.646 | 10.3   | 47    | 485.628   | 1.619 | 5.3    |       |           |       |        |       |           |       |        |
| 9     | 1092.995  | 3.643 | 10.3   | 48    | 482.057   | 1.607 | 7.3    |       |           |       |        |       |           |       |        |
| 10    | 1085.029  | 3.616 | 7.9    | 49    | 477.112   | 1.590 | 6.3    |       |           |       |        |       |           |       |        |
| 11    | 725.169   | 2.417 | 2.4    | 50    | 472.443   | 1.575 | 7.9    |       |           |       |        |       |           |       |        |
| 12    | 720.774   | 2.402 | 5.6    | 51    | 463.927   | 1.546 | 13.3   |       |           |       |        |       |           |       |        |
| 13    | 714.455   | 2.381 | 10.0   | 52    | 462.004   | 1.540 | 13.5   |       |           |       |        |       |           |       |        |
| 14    | 710.884   | 2.369 | 11.9   | 53    | 459.257   | 1.531 | 16.0   |       |           |       |        |       |           |       |        |
| 15    | 709.236   | 2.364 | 12.0   | 54    | 452.684   | 1.509 | 17.2   |       |           |       |        |       |           |       |        |
| 16    | 704.566   | 2.348 | 15.9   | 55    | 444.148   | 1.480 | 9.0    |       |           |       |        |       |           |       |        |
| 17    | 699.621   | 2.332 | 18.9   | 56    | 441.126   | 1.470 | 9.4    |       |           |       |        |       |           |       |        |
| 18    | 697.973   | 2.326 | 18.5   | 57    | 433.160   | 1.444 | 8.1    |       |           |       |        |       |           |       |        |
| 19    | 693.029   | 2.310 | 12.3   | 58    | 429.884   | 1.433 | 7.4    |       |           |       |        |       |           |       |        |
| 20    | 684.788   | 2.282 | 9.8    | 59    | 425.468   | 1.418 | 6.6    |       |           |       |        |       |           |       |        |
| 21    | 679.843   | 2.266 | 9.5    | 60    | 421.897   | 1.406 | 5.8    |       |           |       |        |       |           |       |        |
| 22    | 676.546   | 2.255 | 4.2    | 61    | 419.700   | 1.399 | 5.9    |       |           |       |        |       |           |       |        |
| 23    | 668.580   | 2.228 | 3.9    | 62    | 417.777   | 1.392 | 5.8    |       |           |       |        |       |           |       |        |
| 24    | 663.635   | 2.212 | 3.6    | 63    | 412.008   | 1.373 | 7.5    |       |           |       |        |       |           |       |        |
| 25    | 632.319   | 2.107 | 5.6    | 64    | 401.569   | 1.338 | 9.1    |       |           |       |        |       |           |       |        |
| 26    | 627.375   | 2.091 | 10.4   | 65    | 394.702   | 1.315 | 13.4   |       |           |       |        |       |           |       |        |
| 27    | 622.705   | 2.075 | 15.0   | 66    | 390.581   | 1.302 | 13.9   |       |           |       |        |       |           |       |        |
| 28    | 618.584   | 2.062 | 14.2   | 67    | 388.109   | 1.293 | 13.5   |       |           |       |        |       |           |       |        |
| 29    | 613.914   | 2.046 | 16.6   | 68    | 380.967   | 1.270 | 12.9   |       |           |       |        |       |           |       |        |
| 30    | 609.244   | 2.030 | 21.0   | 69    | 374.099   | 1.247 | 14.1   |       |           |       |        |       |           |       |        |
| 31    | 604.574   | 2.015 | 13.2   | 70    | 366.407   | 1.221 | 10.9   |       |           |       |        |       |           |       |        |
| 32    | 601.278   | 2.004 | 8.2    | 71    | 350.475   | 1.168 | 4.6    |       |           |       |        |       |           |       |        |
| 33    | 597.707   | 1.992 | 7.5    | 72    | 339.212   | 1.131 | 8.1    |       |           |       |        |       |           |       |        |
| 34    | 555.403   | 1.851 | 4.5    | 73    | 331.245   | 1.104 | 9.7    |       |           |       |        |       |           |       |        |
| 35    | 552.381   | 1.841 | 5.3    | 74    | 327.949   | 1.093 | 10.4   |       |           |       |        |       |           |       |        |
| 36    | 549.909   | 1.833 | 5.1    | 75    | 322.455   | 1.075 | 9.5    |       |           |       |        |       |           |       |        |
| 37    | 546.887   | 1.823 | 5.1    | 76    | 312.566   | 1.042 | 5.6    |       |           |       |        |       |           |       |        |
| 38    | 542.492   | 1.808 | 6.0    | 77    | 301.028   | 1.003 | 3.1    |       |           |       |        |       |           |       |        |
| 39    | 539.470   | 1.798 | 6.6    | 78    | 294.710   | 0.982 | 5.7    |       |           |       |        |       |           |       |        |

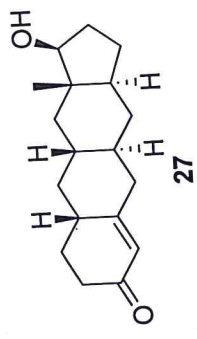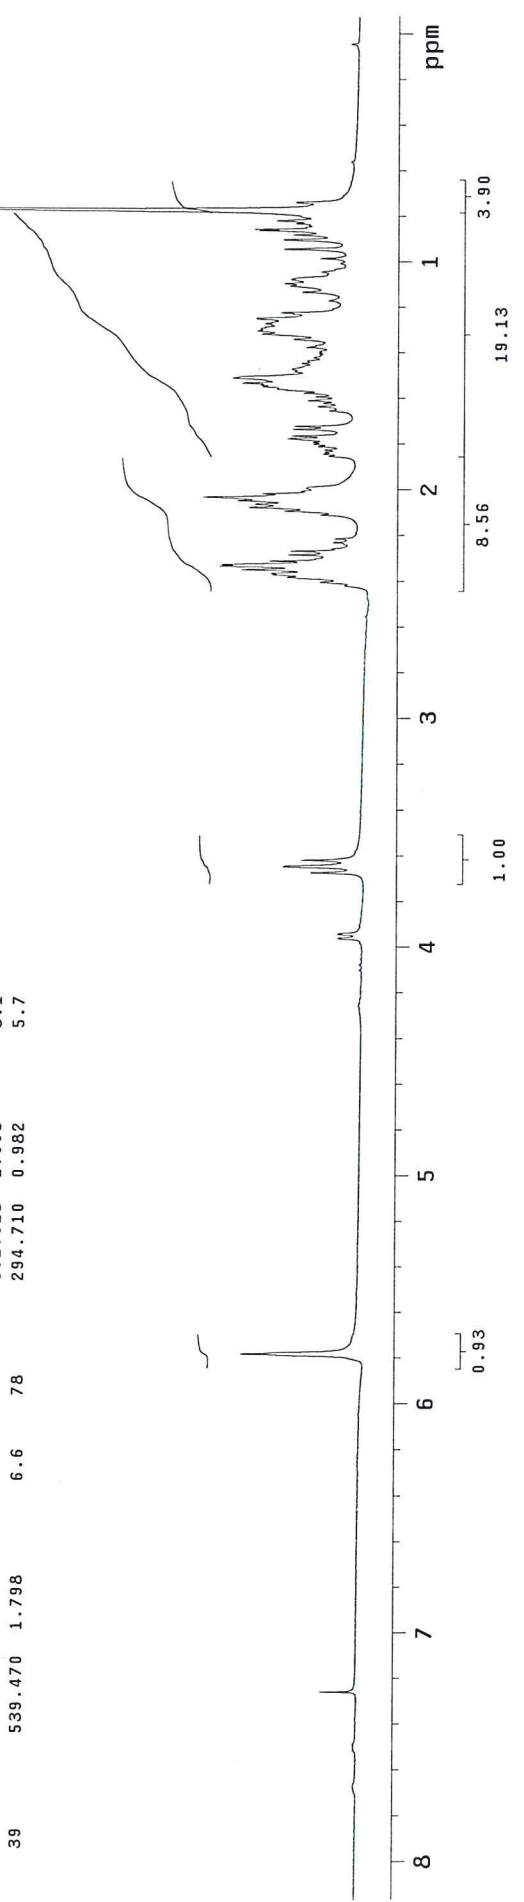

| INDEX | FREQUENCY | PPM     | HEIGHT |
|-------|-----------|---------|--------|
| 1     | 15121.172 | 200.421 | 6.8    |
| 2     | 12592.581 | 166.906 | 8.8    |
| 3     | 9395.198  | 124.527 | 25.0   |
| 4     | 6157.732  | 81.617  | 24.7   |
| 5     | 5857.691  | 77.640  | 18.7   |
| 6     | 5825.626  | 77.215  | 19.4   |
| 7     | 5793.560  | 76.790  | 19.0   |
| 8     | 3386.361  | 44.884  | 21.6   |
| 9     | 3350.860  | 44.413  | 27.2   |
| 10    | 3305.052  | 43.806  | 25.4   |
| 11    | 3293.600  | 43.654  | 13.5   |
| 12    | 3213.436  | 42.592  | 27.1   |
| 13    | 3157.322  | 41.848  | 26.6   |
| 14    | 2871.023  | 38.054  | 21.1   |
| 15    | 2829.796  | 37.507  | 25.7   |
| 16    | 2775.972  | 36.794  | 24.5   |
| 17    | 2473.640  | 32.786  | 26.4   |
| 18    | 2304.152  | 30.540  | 29.5   |
| 19    | 2207.955  | 29.265  | 26.7   |
| 20    | 1915.931  | 25.394  | 26.6   |
| 21    | 863.497   | 11.445  | 21.8   |

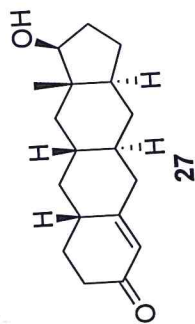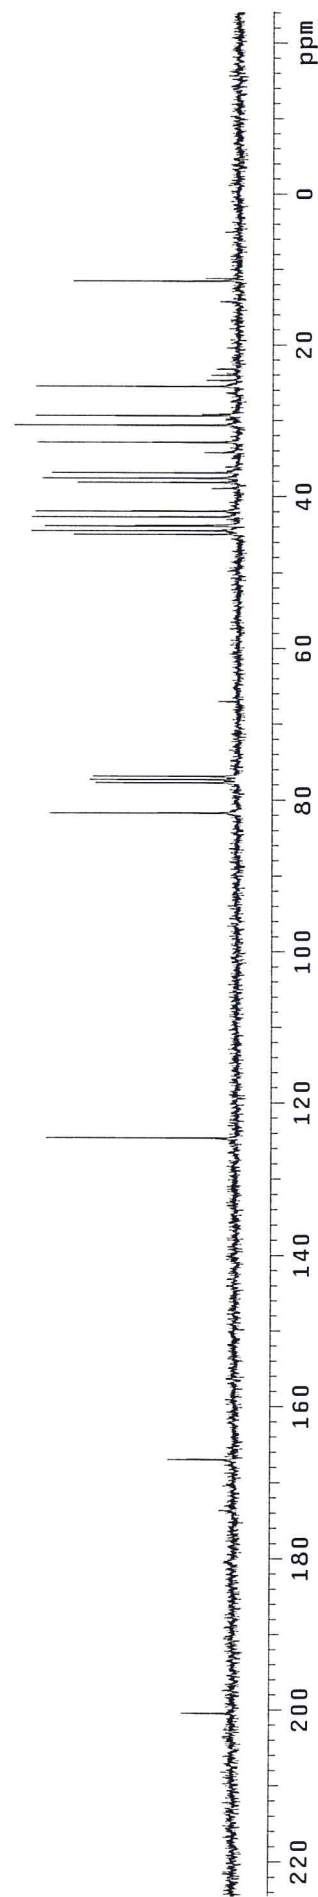

2153 (28)

| INDEX | FREQUENCY | PPM   | HEIGHT | INDEX | FREQUENCY | PPM   | HEIGHT |
|-------|-----------|-------|--------|-------|-----------|-------|--------|
| 1     | 2178.345  | 7.260 | 1.6    | 40    | 469.970   | 1.566 | 11.5   |
| 2     | 1711.900  | 5.705 | 17.7   | 41    | 462.553   | 1.542 | 16.6   |
| 3     | 719.400   | 2.398 | 3.8    | 42    | 459.806   | 1.532 | 16.0   |
| 4     | 710.884   | 2.369 | 6.7    | 43    | 452.664   | 1.509 | 7.9    |
| 5     | 706.764   | 2.356 | 9.0    | 44    | 447.719   | 1.492 | 9.3    |
| 6     | 703.467   | 2.345 | 10.3   | 45    | 444.423   | 1.481 | 7.7    |
| 7     | 697.149   | 2.323 | 11.4   | 46    | 439.753   | 1.466 | 5.4    |
| 8     | 692.204   | 2.307 | 20.9   | 47    | 434.259   | 1.447 | 6.9    |
| 9     | 685.337   | 2.284 | 10.1   | 48    | 424.644   | 1.415 | 2.6    |
| 10    | 680.942   | 2.269 | 13.4   | 49    | 421.623   | 1.405 | 3.0    |
| 11    | 675.997   | 2.253 | 11.9   | 50    | 376.846   | 1.256 | 2.1    |
| 12    | 670.778   | 2.236 | 8.2    | 51    | 366.407   | 1.221 | 5.4    |
| 13    | 662.537   | 2.208 | 7.5    | 52    | 354.870   | 1.183 | 7.1    |
| 14    | 658.965   | 2.196 | 6.7    | 53    | 346.904   | 1.156 | 2.7    |
| 15    | 657.592   | 2.192 | 8.4    | 54    | 345.530   | 1.152 | 4.0    |
| 16    | 654.570   | 2.182 | 3.0    | 55    | 343.332   | 1.144 | 4.3    |
| 17    | 646.329   | 2.154 | 2.8    | 56    | 338.388   | 1.128 | 4.0    |
| 18    | 641.385   | 2.138 | 3.1    | 57    | 327.400   | 1.091 | 5.5    |
| 19    | 619.958   | 2.066 | 4.1    | 58    | 315.313   | 1.051 | 4.3    |
| 20    | 611.442   | 2.038 | 15.5   | 59    | 304.050   | 1.013 | 1.6    |
| 21    | 606.497   | 2.021 | 8.2    | 60    | 283.447   | 0.945 | 11.0   |
| 22    | 602.102   | 2.007 | 15.3   | 61    | 271.086   | 0.903 | 19.9   |
| 23    | 599.080   | 1.997 | 12.6   | 62    | 258.724   | 0.862 | 13.5   |
| 24    | 593.037   | 1.976 | 10.3   | 63    | 247.736   | 0.826 | 100.0  |
| 25    | 588.092   | 1.960 | 7.9    |       |           |       |        |
| 26    | 580.950   | 1.936 | 3.9    |       |           |       |        |
| 27    | 551.557   | 1.838 | 5.3    |       |           |       |        |
| 28    | 544.140   | 1.814 | 11.8   |       |           |       |        |
| 29    | 538.921   | 1.796 | 6.5    |       |           |       |        |
| 30    | 534.800   | 1.782 | 8.1    |       |           |       |        |
| 31    | 531.504   | 1.771 | 7.8    |       |           |       |        |
| 32    | 526.010   | 1.753 | 5.0    |       |           |       |        |
| 33    | 509.802   | 1.699 | 7.6    |       |           |       |        |
| 34    | 506.231   | 1.687 | 7.8    |       |           |       |        |
| 35    | 496.891   | 1.656 | 10.4   |       |           |       |        |
| 36    | 493.045   | 1.643 | 14.1   |       |           |       |        |
| 37    | 478.486   | 1.595 | 8.9    |       |           |       |        |
| 38    | 477.112   | 1.590 | 9.3    |       |           |       |        |
| 39    | 472.717   | 1.575 | 11.0   |       |           |       |        |

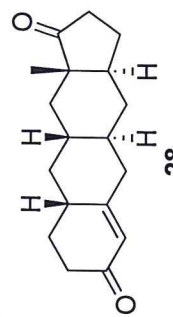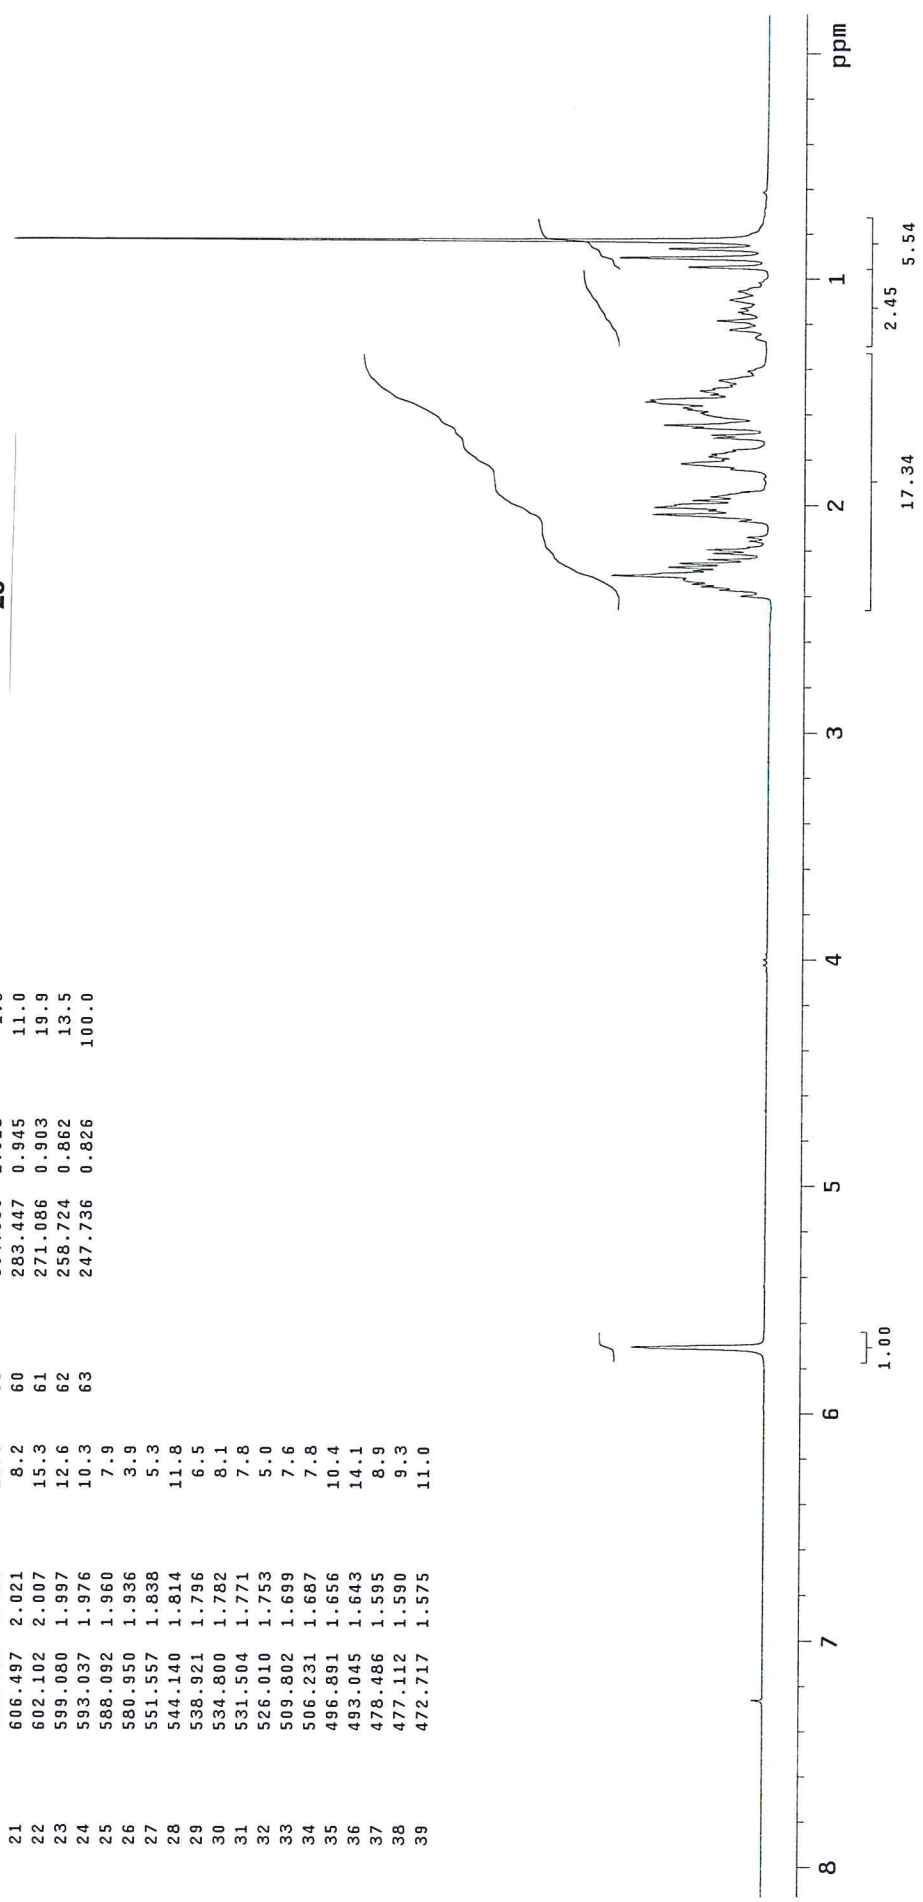



2153

| INDEX | FREQUENCY | PPM     | HEIGHT |
|-------|-----------|---------|--------|
| 1     | 16577.687 | 219.726 | 11.9   |
| 2     | 15058.013 | 199.584 | 17.0   |
| 3     | 12490.486 | 165.553 | 19.2   |
| 4     | 9378.992  | 124.312 | 46.6   |
| 5     | 5840.340  | 77.410  | 12.8   |
| 6     | 5808.275  | 76.985  | 12.7   |
| 7     | 5776.209  | 76.560  | 12.9   |
| 8     | 3609.501  | 47.842  | 26.3   |
| 9     | 3399.930  | 45.064  | 38.4   |
| 10    | 3308.315  | 43.850  | 50.0   |
| 11    | 3159.439  | 41.876  | 39.2   |
| 12    | 3095.308  | 41.026  | 44.3   |
| 13    | 2869.705  | 38.036  | 37.5   |
| 14    | 2827.333  | 37.474  | 48.0   |
| 15    | 2776.944  | 36.807  | 41.8   |
| 16    | 2747.169  | 36.412  | 42.2   |
| 17    | 2668.151  | 35.365  | 47.4   |
| 18    | 2407.046  | 31.904  | 49.4   |
| 19    | 2173.427  | 28.807  | 42.6   |
| 20    | 1774.899  | 23.525  | 46.6   |
| 21    | 1012.199  | 13.416  | 43.8   |

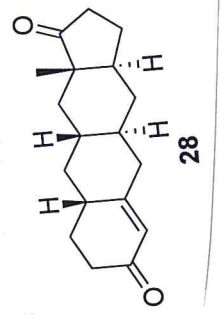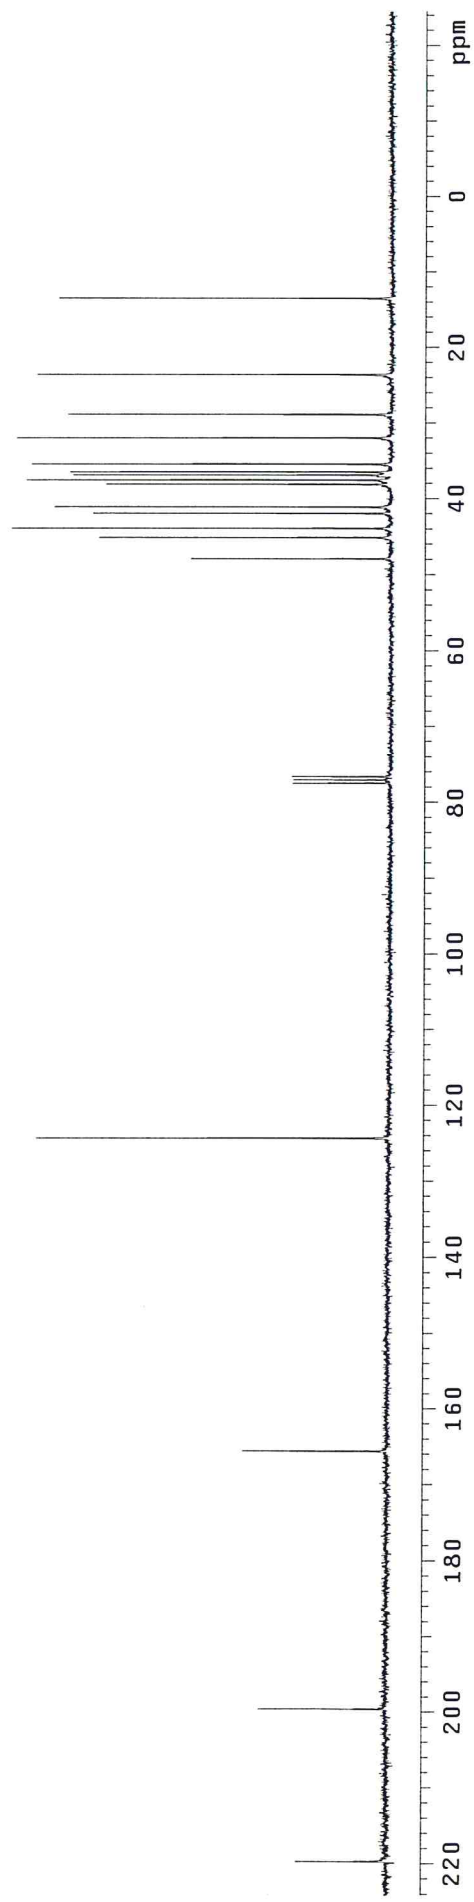

| INDEX | FREQUENCY | PPM   | HEIGHT | INDEX | FREQUENCY | PPM   | HEIGHT |
|-------|-----------|-------|--------|-------|-----------|-------|--------|
| 1     | 1049.913  | 3.499 | 2.1    | 40    | 475.235   | 1.584 | 2.7    |
| 2     | 1041.672  | 3.472 | 3.3    | 41    | 473.312   | 1.577 | 2.7    |
| 3     | 1033.705  | 3.445 | 2.3    | 42    | 469.741   | 1.566 | 1.8    |
| 4     | 728.786   | 2.429 | 2.0    | 43    | 465.346   | 1.551 | 1.6    |
| 5     | 725.489   | 2.418 | 1.1    | 44    | 462.050   | 1.540 | 1.5    |
| 6     | 721.918   | 2.406 | 2.3    | 45    | 445.018   | 1.483 | 1.1    |
| 7     | 715.875   | 2.386 | 2.3    | 46    | 440.623   | 1.469 | 2.3    |
| 8     | 709.007   | 2.363 | 2.5    | 47    | 433.755   | 1.446 | 2.8    |
| 9     | 702.139   | 2.340 | 3.1    | 48    | 427.712   | 1.425 | 4.0    |
| 10    | 694.997   | 2.316 | 11.5   | 49    | 422.218   | 1.407 | 3.5    |
| 11    | 686.756   | 2.289 | 6.0    | 50    | 415.350   | 1.384 | 2.5    |
| 12    | 685.108   | 2.283 | 6.4    | 51    | 409.307   | 1.364 | 1.3    |
| 13    | 612.312   | 2.041 | 3.4    | 52    | 384.858   | 1.283 | 1.1    |
| 14    | 611.488   | 2.038 | 3.0    | 53    | 377.716   | 1.259 | 1.9    |
| 15    | 606.818   | 2.022 | 1.3    | 54    | 376.617   | 1.255 | 1.6    |
| 16    | 604.620   | 2.015 | 1.6    | 55    | 370.574   | 1.235 | 1.3    |
| 17    | 600.774   | 2.002 | 1.7    | 56    | 369.475   | 1.231 | 1.2    |
| 18    | 597.753   | 1.992 | 2.0    | 57    | 362.882   | 1.209 | 1.1    |
| 19    | 595.830   | 1.986 | 2.7    | 58    | 361.234   | 1.204 | 1.4    |
| 20    | 590.895   | 1.969 | 1.9    | 59    | 360.135   | 1.200 | 1.5    |
| 21    | 589.511   | 1.965 | 2.2    | 60    | 359.311   | 1.198 | 1.5    |
| 22    | 587.314   | 1.957 | 2.1    | 61    | 356.838   | 1.189 | 1.8    |
| 23    | 582.919   | 1.943 | 2.5    | 62    | 353.817   | 1.179 | 2.3    |
| 24    | 581.820   | 1.939 | 2.4    | 63    | 349.696   | 1.165 | 6.9    |
| 25    | 576.051   | 1.920 | 1.7    | 64    | 348.872   | 1.163 | 6.7    |
| 26    | 574.678   | 1.915 | 1.7    | 65    | 343.653   | 1.145 | 114.6  |
| 27    | 526.605   | 1.755 | 1.1    | 66    | 342.554   | 1.142 | 88.1   |
| 28    | 519.737   | 1.732 | 1.7    | 67    | 292.558   | 0.975 | 33.5   |
| 29    | 511.496   | 1.705 | 1.1    |       |           |       |        |
| 30    | 509.024   | 1.696 | 1.3    |       |           |       |        |
| 31    | 501.607   | 1.672 | 1.1    |       |           |       |        |
| 32    | 495.014   | 1.650 | 1.9    |       |           |       |        |
| 33    | 492.267   | 1.641 | 1.4    |       |           |       |        |
| 34    | 491.443   | 1.638 | 1.5    |       |           |       |        |
| 35    | 486.773   | 1.622 | 2.0    |       |           |       |        |
| 36    | 484.026   | 1.613 | 3.2    |       |           |       |        |
| 37    | 483.202   | 1.610 | 3.2    |       |           |       |        |
| 38    | 482.103   | 1.607 | 2.8    |       |           |       |        |
| 39    | 476.883   | 1.589 | 2.4    |       |           |       |        |

10/16  
10/10/17

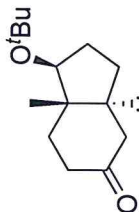

29

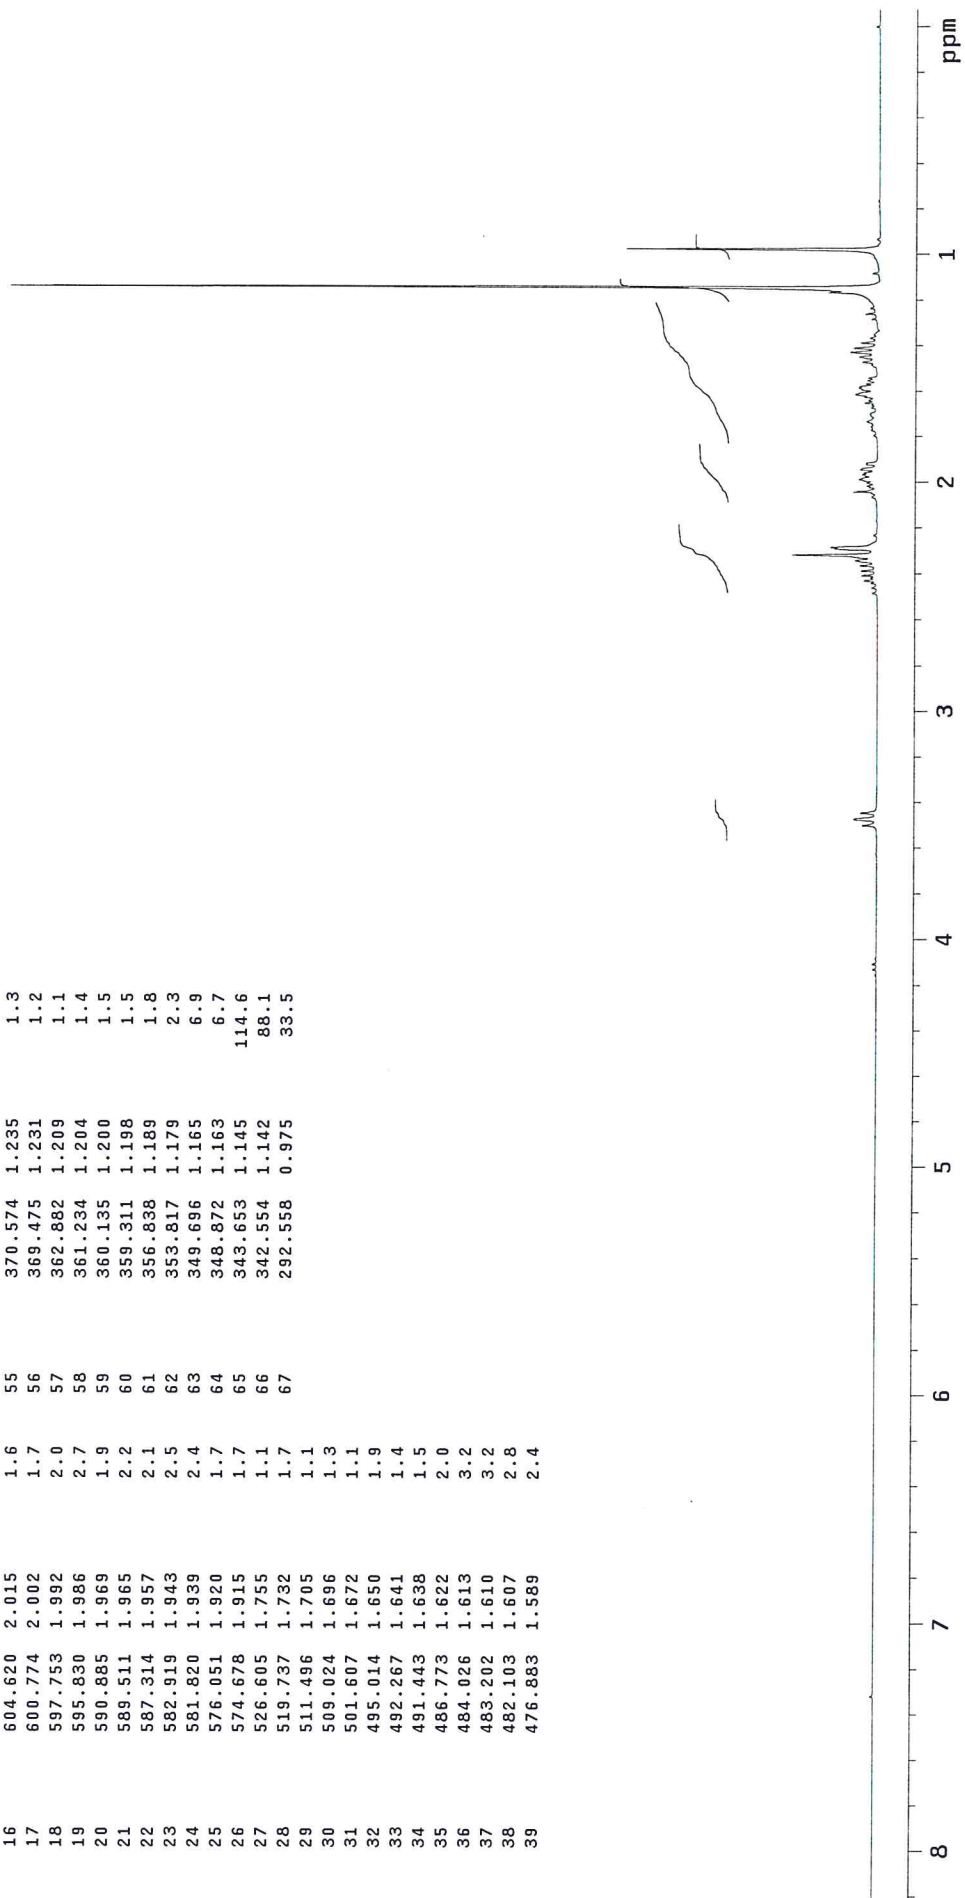

| INDEX | FREQUENCY | PPM     | HEIGHT |
|-------|-----------|---------|--------|
| 1     | 15993.810 | 211.987 | 3.1    |
| 2     | 5995.114  | 79.461  | 16.2   |
| 3     | 5858.836  | 77.655  | 3.1    |
| 4     | 5826.771  | 77.230  | 3.2    |
| 5     | 5794.705  | 76.805  | 3.2    |
| 6     | 5475.196  | 72.570  | 8.2    |
| 7     | 3370.328  | 44.671  | 16.8   |
| 8     | 3243.211  | 42.987  | 21.5   |
| 9     | 3176.790  | 42.106  | 6.7    |
| 10    | 2826.360  | 37.452  | 20.0   |
| 11    | 2662.598  | 35.291  | 20.5   |
| 12    | 2404.929  | 31.876  | 18.9   |
| 13    | 2170.164  | 28.764  | 65.1   |
| 14    | 1953.722  | 25.895  | 15.9   |
| 15    | 775.317   | 10.276  | 13.6   |

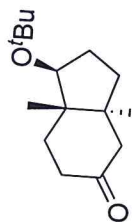

29

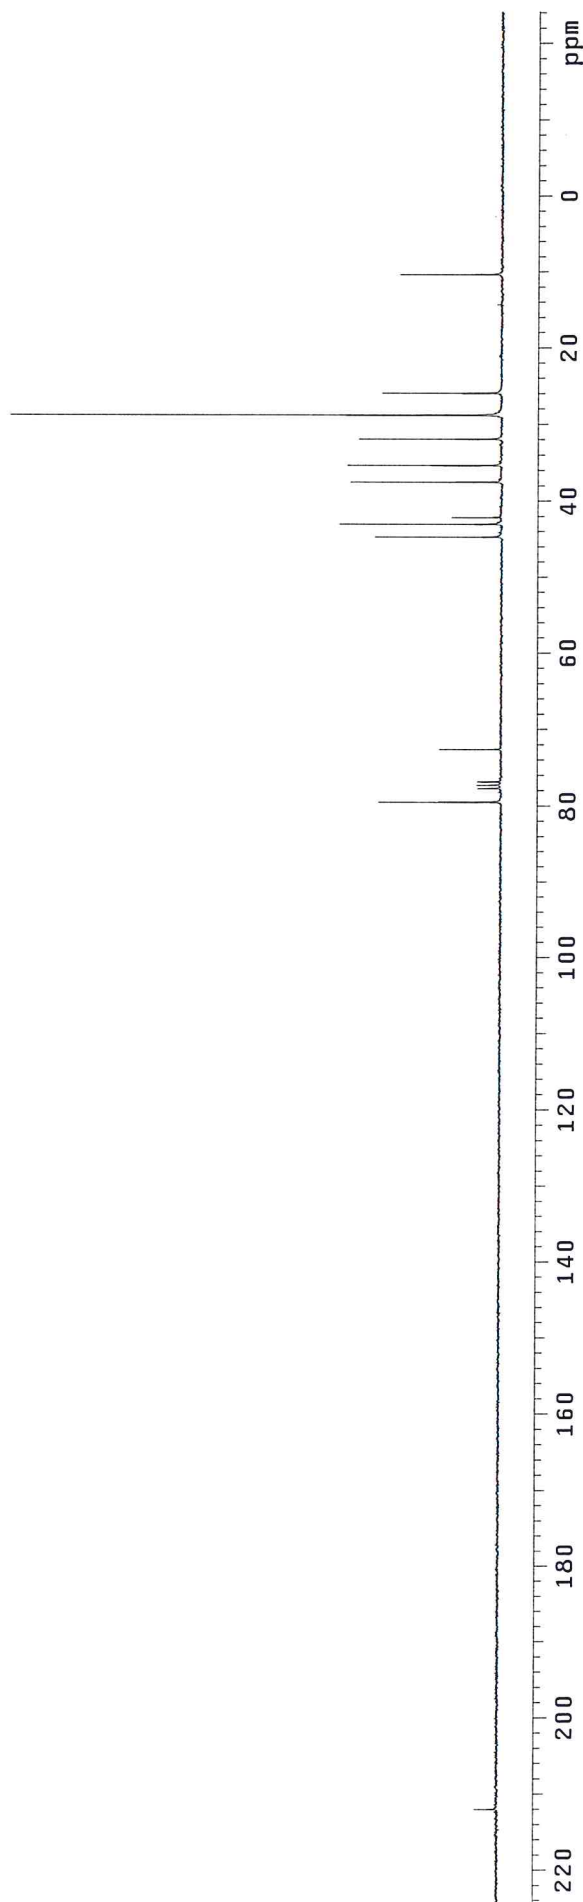

| INDEX | FREQUENCY | PPM    | HEIGHT |
|-------|-----------|--------|--------|
| 1     | 3691.177  | 12.302 | 9.3    |
| 2     | 1126.280  | 3.754  | 42.4   |
| 3     | 651.045   | 2.170  | 5.5    |
| 4     | 350.795   | 1.169  | 111.5  |
| 5     | 216.191   | 0.721  | 25.0   |

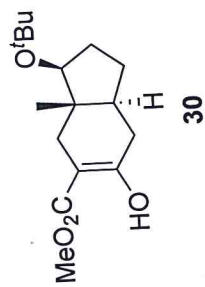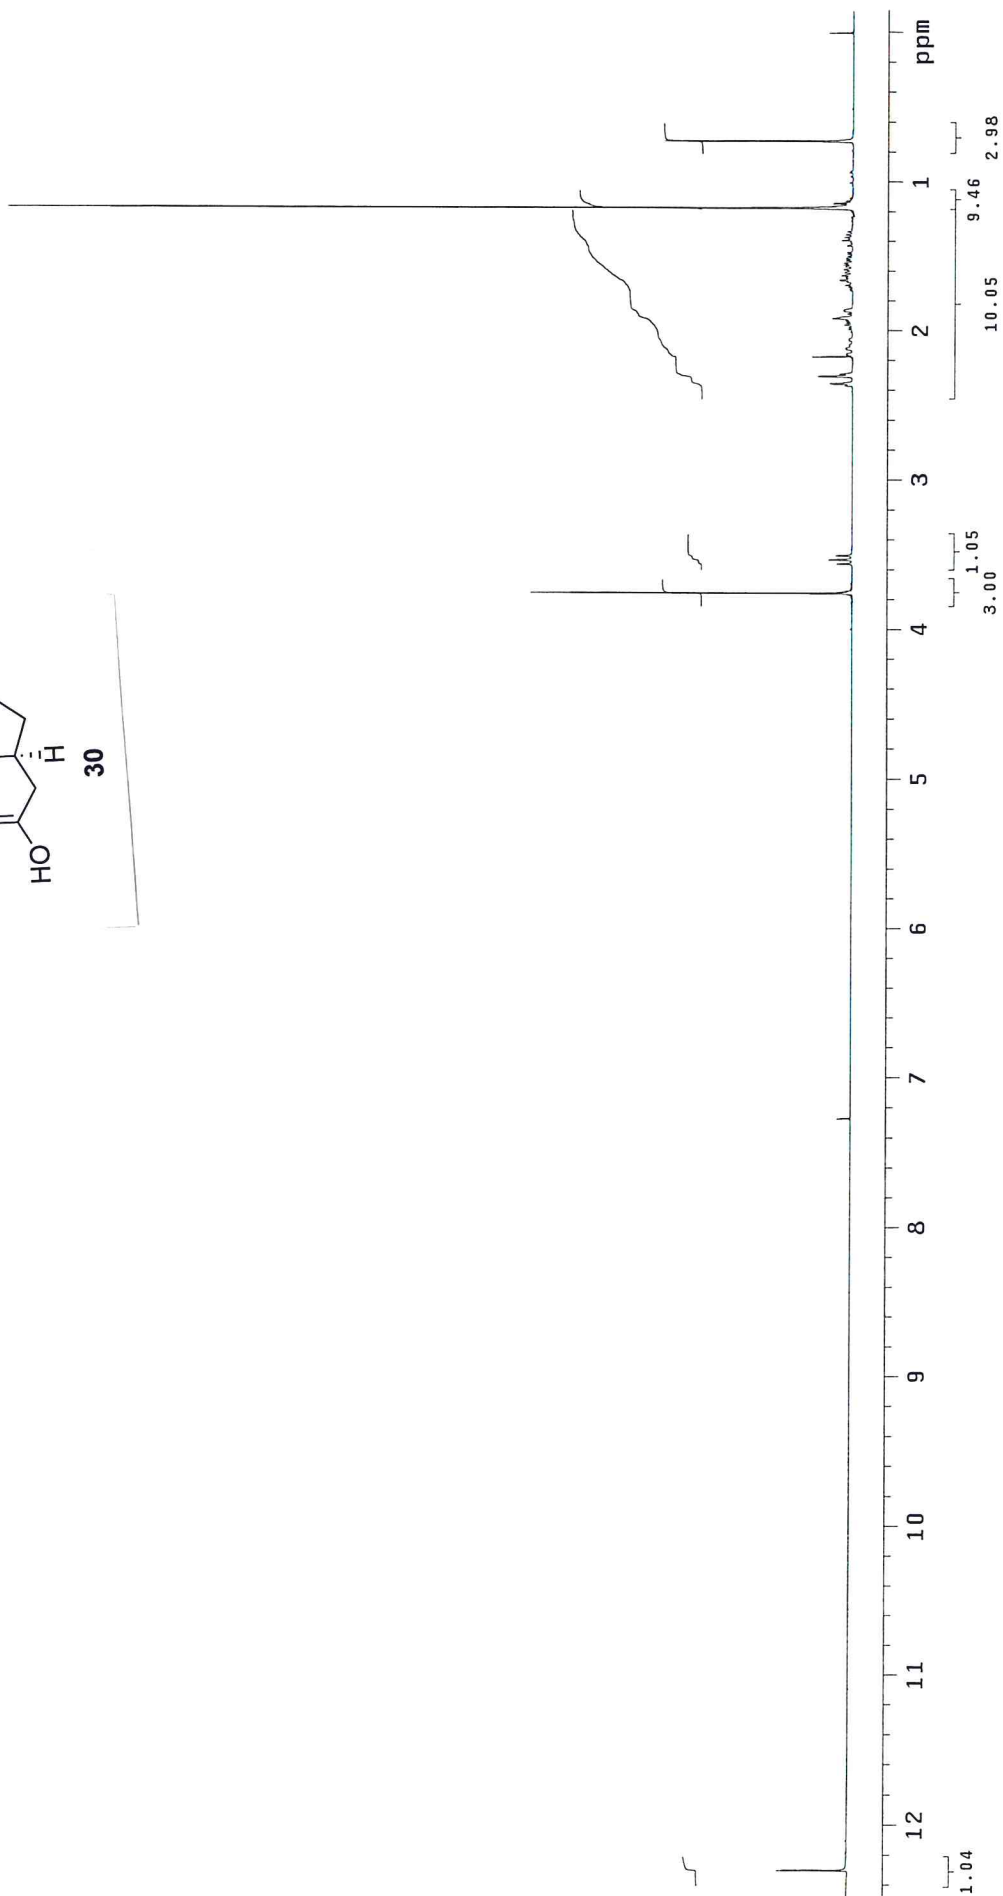

| INDEX | FREQUENCY | PPM     | HEIGHT |
|-------|-----------|---------|--------|
| 1     | 13118.226 | 173.873 | 4.1    |
| 2     | 13007.142 | 172.401 | 10.9   |
| 3     | 7321.250  | 97.038  | 6.9    |
| 4     | 6051.229  | 80.205  | 17.1   |
| 5     | 5857.691  | 77.640  | 17.5   |
| 6     | 5825.625  | 77.215  | 18.4   |
| 7     | 5793.560  | 76.790  | 17.5   |
| 8     | 5476.341  | 72.585  | 10.0   |
| 9     | 3889.101  | 51.547  | 8.7    |
| 10    | 3147.015  | 41.712  | 9.6    |
| 11    | 3017.608  | 39.996  | 16.5   |
| 12    | 2656.871  | 35.215  | 17.4   |
| 13    | 2432.413  | 32.240  | 17.4   |
| 14    | 2385.460  | 31.618  | 18.3   |
| 15    | 2185.051  | 28.961  | 57.8   |
| 16    | 1947.996  | 25.819  | 21.6   |
| 17    | 810.817   | 10.747  | 21.7   |

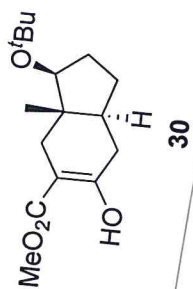

30

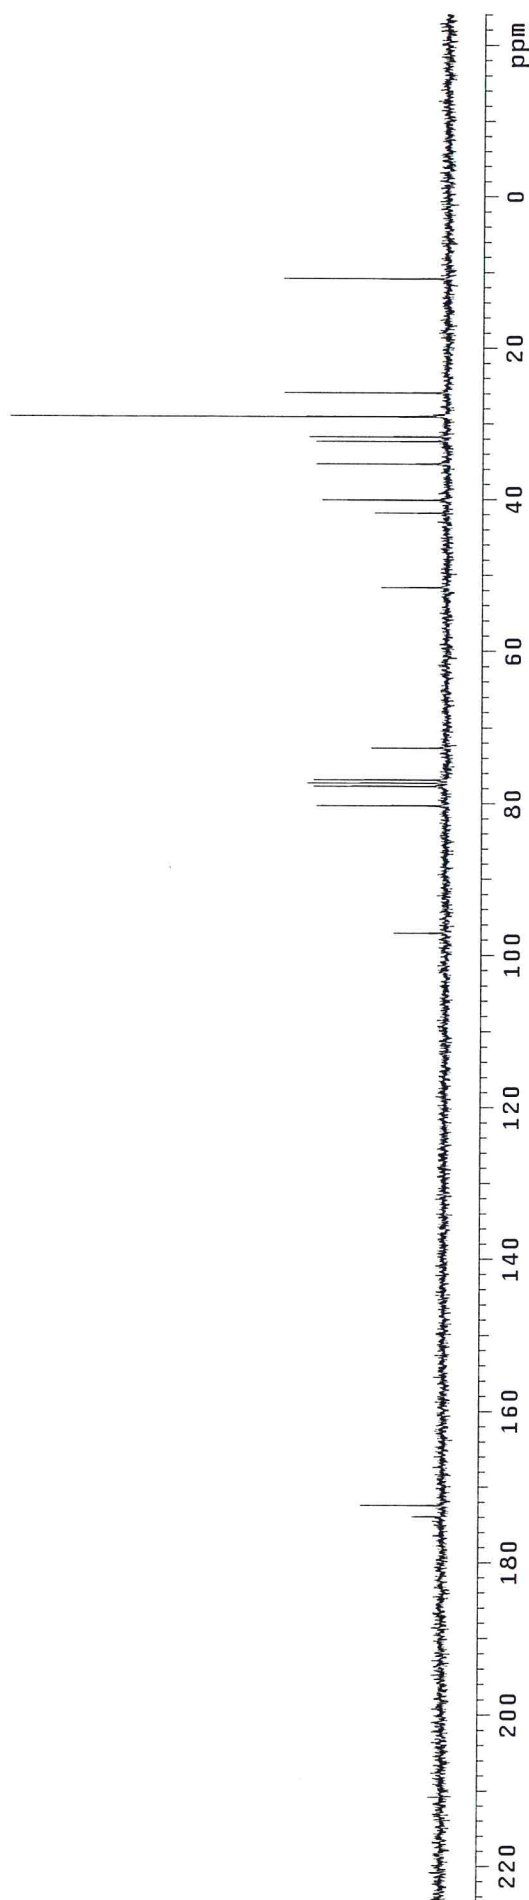

| INDEX | FREQUENCY | PPM   | HEIGHT | INDEX | FREQUENCY | PPM    | HEIGHT |
|-------|-----------|-------|--------|-------|-----------|--------|--------|
| 1     | 2180.039  | 7.266 | 2.2    | 40    | 430.459   | 1.435  | 5.9    |
| 2     | 2148.997  | 7.162 | 2.2    | 41    | 423.042   | 1.410  | 3.0    |
| 3     | 2141.855  | 7.138 | 3.7    | 42    | 416.998   | 1.390  | 6.1    |
| 4     | 2141.031  | 7.136 | 3.6    | 43    | 411.230   | 1.371  | 2.0    |
| 5     | 2133.064  | 7.109 | 2.6    | 44    | 344.202   | 1.147  | 7.5    |
| 6     | 2028.128  | 6.759 | 13.8   | 45    | 335.137   | 1.117  | 100.0  |
| 7     | 2022.634  | 6.741 | 5.5    | 46    | 265.363   | 0.884  | 2.4    |
| 8     | 2020.986  | 6.736 | 5.2    | 47    | 245.309   | 0.818  | 27.9   |
| 9     | 2018.239  | 6.726 | 2.9    | 48    | -0.000    | -0.000 | 1.9    |
| 10    | 1142.762  | 3.809 | 3.0    |       |           |        |        |
| 11    | 1142.213  | 3.807 | 2.9    |       |           |        |        |
| 12    | 1140.015  | 3.799 | 1.8    |       |           |        |        |
| 13    | 1128.203  | 3.760 | 43.5   |       |           |        |        |
| 14    | 1121.061  | 3.736 | 3.2    |       |           |        |        |
| 15    | 1118.039  | 3.726 | 1.8    |       |           |        |        |
| 16    | 1116.116  | 3.720 | 3.3    |       |           |        |        |
| 17    | 1088.646  | 3.628 | 41.4   |       |           |        |        |
| 18    | 1060.077  | 3.533 | 2.9    |       |           |        |        |
| 19    | 999.367   | 3.331 | 2.1    |       |           |        |        |
| 20    | 992.225   | 3.307 | 3.0    |       |           |        |        |
| 21    | 983.435   | 3.278 | 2.1    |       |           |        |        |
| 22    | 957.063   | 3.190 | 3.7    |       |           |        |        |
| 23    | 943.603   | 3.145 | 5.9    |       |           |        |        |
| 24    | 903.496   | 3.011 | 5.8    |       |           |        |        |
| 25    | 890.311   | 2.967 | 3.6    |       |           |        |        |
| 26    | 780.430   | 2.601 | 3.0    |       |           |        |        |
| 27    | 768.617   | 2.562 | 5.7    |       |           |        |        |
| 28    | 755.157   | 2.517 | 5.0    |       |           |        |        |
| 29    | 722.193   | 2.407 | 3.2    |       |           |        |        |
| 30    | 719.171   | 2.397 | 3.0    |       |           |        |        |
| 31    | 707.908   | 2.359 | 2.1    |       |           |        |        |
| 32    | 704.886   | 2.349 | 1.9    |       |           |        |        |
| 33    | 510.672   | 1.702 | 2.3    |       |           |        |        |
| 34    | 458.753   | 1.529 | 2.7    |       |           |        |        |
| 35    | 457.105   | 1.523 | 2.7    |       |           |        |        |
| 36    | 450.512   | 1.501 | 3.3    |       |           |        |        |
| 37    | 445.842   | 1.486 | 2.8    |       |           |        |        |
| 38    | 443.370   | 1.478 | 2.7    |       |           |        |        |
| 39    | 436.502   | 1.455 | 2.8    |       |           |        |        |

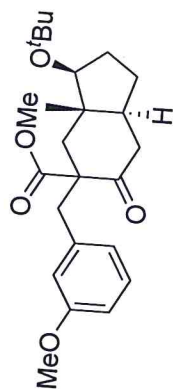

31

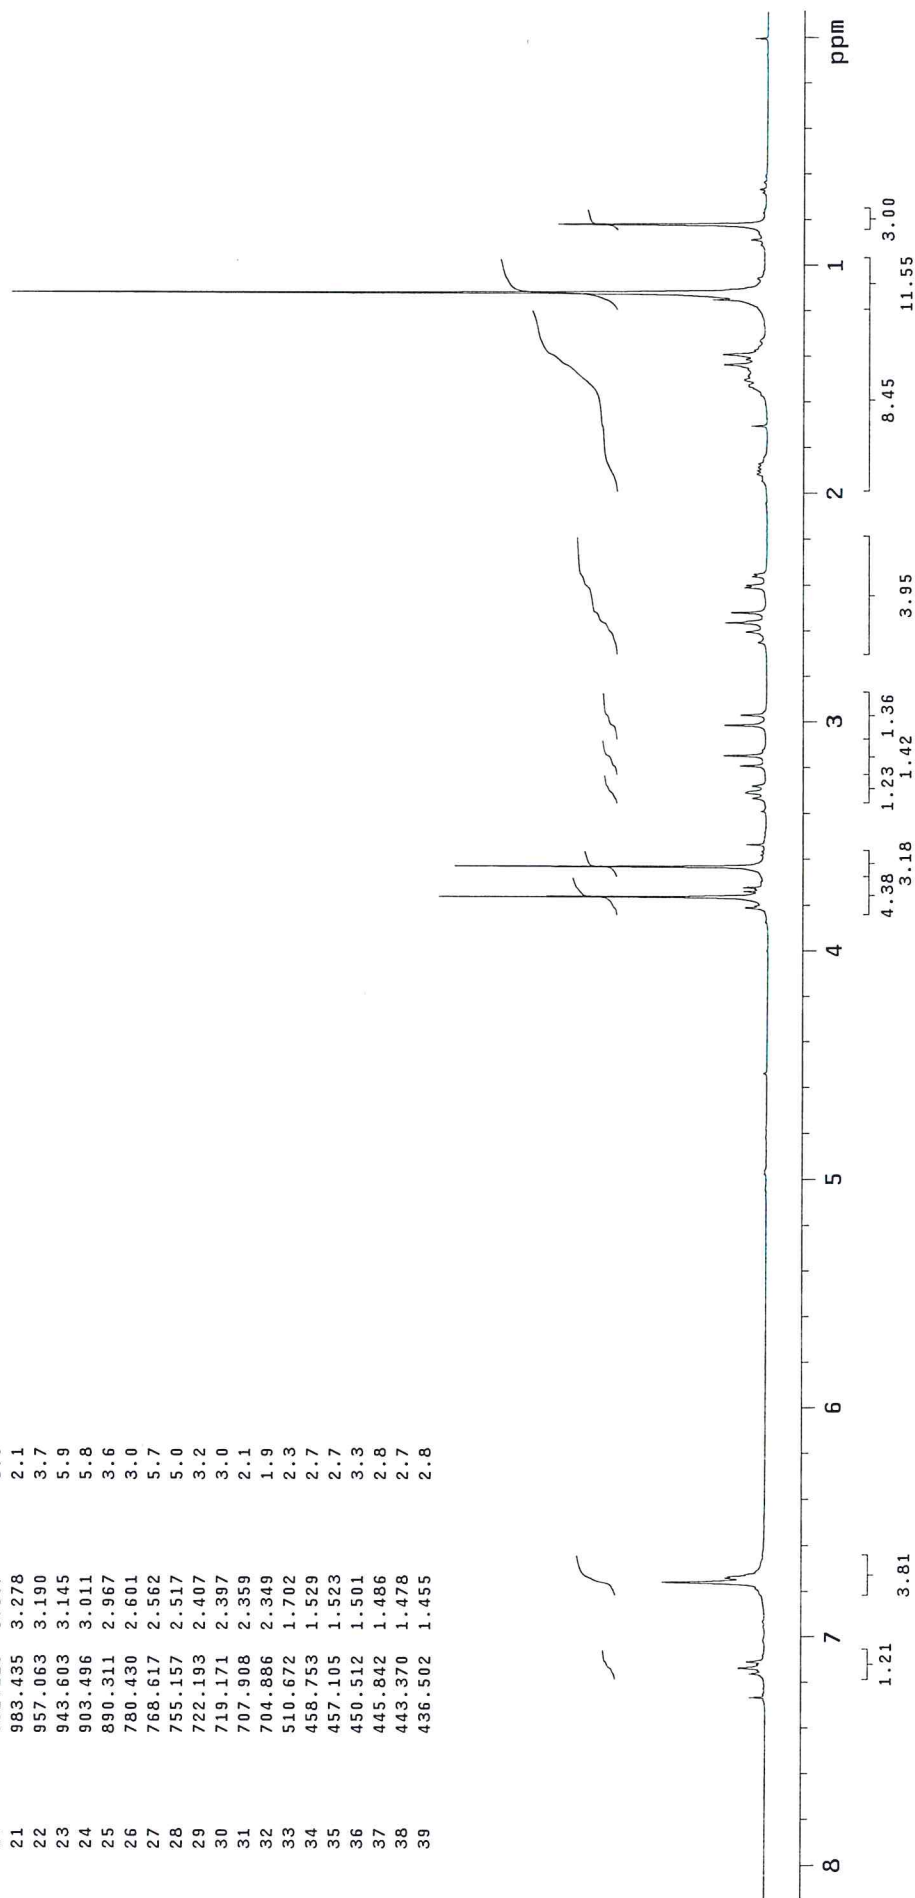



| INDEX | FREQUENCY | PPM     | HEIGHT |
|-------|-----------|---------|--------|
| 1     | 15654.832 | 207.494 | 6.9    |
| 2     | 13114.790 | 173.828 | 7.6    |
| 3     | 12022.274 | 159.347 | 7.8    |
| 4     | 10451.067 | 138.522 | 10.0   |
| 5     | 9721.578  | 128.853 | 18.0   |
| 6     | 9333.357  | 123.707 | 17.0   |
| 7     | 8797.406  | 116.604 | 14.5   |
| 8     | 8504.236  | 112.718 | 18.0   |
| 9     | 6069.552  | 80.448  | 16.0   |
| 10    | 5856.546  | 77.825  | 16.3   |
| 11    | 5824.480  | 77.200  | 16.7   |
| 12    | 5792.415  | 76.775  | 15.8   |
| 13    | 5490.083  | 72.767  | 9.4    |
| 14    | 4480.022  | 59.380  | 12.2   |
| 15    | 4166.238  | 55.221  | 16.2   |
| 16    | 3961.248  | 52.504  | 10.7   |
| 17    | 3440.185  | 45.597  | 16.2   |
| 18    | 3412.700  | 45.233  | 19.8   |
| 19    | 3208.855  | 42.531  | 16.4   |
| 20    | 3205.420  | 42.486  | 20.9   |
| 21    | 3158.467  | 41.863  | 17.1   |
| 22    | 2376.299  | 31.496  | 16.2   |
| 23    | 2167.873  | 28.734  | 58.4   |
| 24    | 1937.689  | 25.683  | 16.7   |
| 25    | 876.094   | 11.612  | 19.7   |

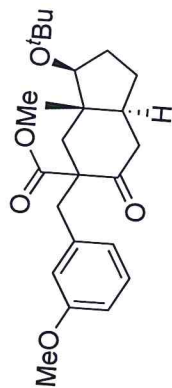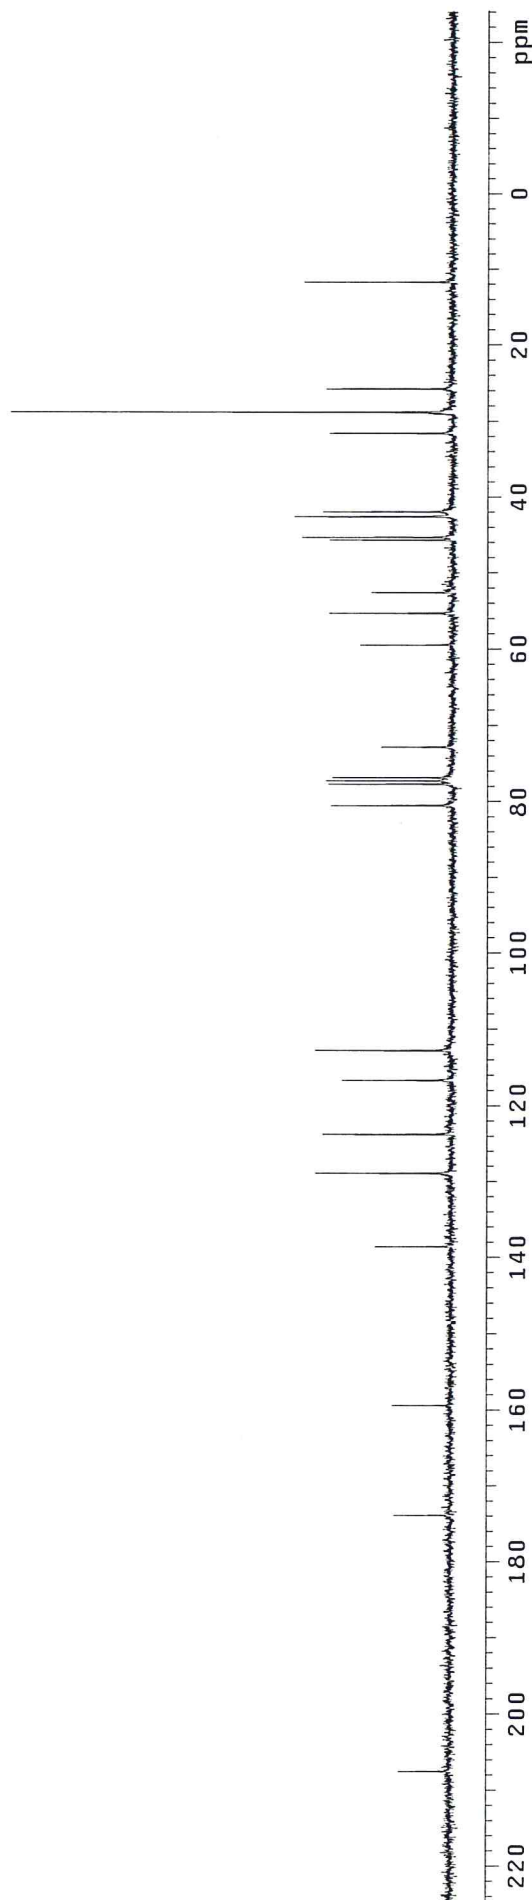

| INDEX | FREQUENCY | PPM   | HEIGHT | INDEX | FREQUENCY | PPM   | HEIGHT |
|-------|-----------|-------|--------|-------|-----------|-------|--------|
| 1     | 2177.841  | 7.258 | 2.7    | 40    | 512.045   | 1.707 | 1.5    |
| 2     | 2159.711  | 7.198 | 4.6    | 41    | 506.002   | 1.686 | 2.3    |
| 3     | 2151.744  | 7.171 | 8.9    | 42    | 499.684   | 1.665 | 3.4    |
| 4     | 2144.053  | 7.146 | 6.1    | 43    | 493.640   | 1.645 | 2.9    |
| 5     | 2022.634  | 6.741 | 13.5   | 44    | 487.047   | 1.623 | 2.3    |
| 6     | 2014.668  | 6.714 | 15.6   | 45    | 483.202   | 1.610 | 3.7    |
| 7     | 2011.371  | 6.704 | 9.9    | 46    | 472.213   | 1.574 | 5.1    |
| 8     | 2009.723  | 6.698 | 9.1    | 47    | 466.445   | 1.555 | 3.7    |
| 9     | 1141.663  | 3.805 | 3.4    | 48    | 464.247   | 1.547 | 4.8    |
| 10    | 1138.916  | 3.796 | 1.8    | 49    | 462.324   | 1.541 | 4.5    |
| 11    | 1133.148  | 3.777 | 75.7   | 50    | 459.028   | 1.530 | 3.2    |
| 12    | 1130.675  | 3.768 | 9.3    | 51    | 455.182   | 1.517 | 2.5    |
| 13    | 1125.731  | 3.752 | 6.4    | 52    | 453.534   | 1.512 | 2.7    |
| 14    | 1120.511  | 3.734 | 2.5    | 53    | 451.611   | 1.505 | 2.6    |
| 15    | 1117.490  | 3.724 | 1.6    | 54    | 441.447   | 1.471 | 1.6    |
| 16    | 1030.409  | 3.434 | 3.3    | 55    | 437.601   | 1.458 | 1.9    |
| 17    | 1022.992  | 3.409 | 5.0    | 56    | 431.008   | 1.436 | 3.2    |
| 18    | 1014.201  | 3.380 | 3.9    | 57    | 424.965   | 1.416 | 3.6    |
| 19    | 990.028   | 3.300 | 3.7    | 58    | 419.471   | 1.398 | 2.7    |
| 20    | 985.083   | 3.283 | 3.9    | 59    | 412.878   | 1.376 | 2.6    |
| 21    | 976.292   | 3.254 | 4.3    | 60    | 348.597   | 1.162 | 1.5    |
| 22    | 971.348   | 3.237 | 4.3    | 61    | 342.279   | 1.141 | 11.1   |
| 23    | 791.692   | 2.639 | 1.6    | 62    | 335.412   | 1.118 | 4.7    |
| 24    | 789.770   | 2.632 | 1.5    | 63    | 327.171   | 1.090 | 200.0  |
| 25    | 784.550   | 2.615 | 2.5    | 64    | 322.775   | 1.076 | 17.6   |
| 26    | 778.507   | 2.595 | 2.6    | 65    | 316.183   | 1.054 | 5.3    |
| 27    | 771.639   | 2.572 | 1.9    | 66    | 312.886   | 1.043 | 4.6    |
| 28    | 726.863   | 2.422 | 1.6    | 67    | 307.667   | 1.025 | 1.8    |
| 29    | 720.819   | 2.402 | 5.3    | 68    | 298.602   | 0.995 | 4.1    |
| 30    | 712.853   | 2.376 | 10.6   | 69    | 291.185   | 0.970 | 2.5    |
| 31    | 706.809   | 2.356 | 12.0   | 70    | 282.394   | 0.941 | 54.6   |
| 32    | 700.766   | 2.336 | 18.4   | 71    | 220.586   | 0.735 | 2.8    |
| 33    | 692.800   | 2.309 | 2.4    | 72    | 0.000     | 0.000 | 2.1    |
| 34    | 599.675   | 1.999 | 5.5    |       |           |       |        |
| 35    | 593.632   | 1.978 | 6.5    |       |           |       |        |
| 36    | 587.039   | 1.956 | 7.1    |       |           |       |        |
| 37    | 580.996   | 1.936 | 6.3    |       |           |       |        |
| 38    | 571.930   | 1.906 | 1.5    |       |           |       |        |
| 39    | 524.407   | 1.748 | 2.4    |       |           |       |        |

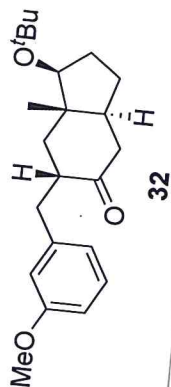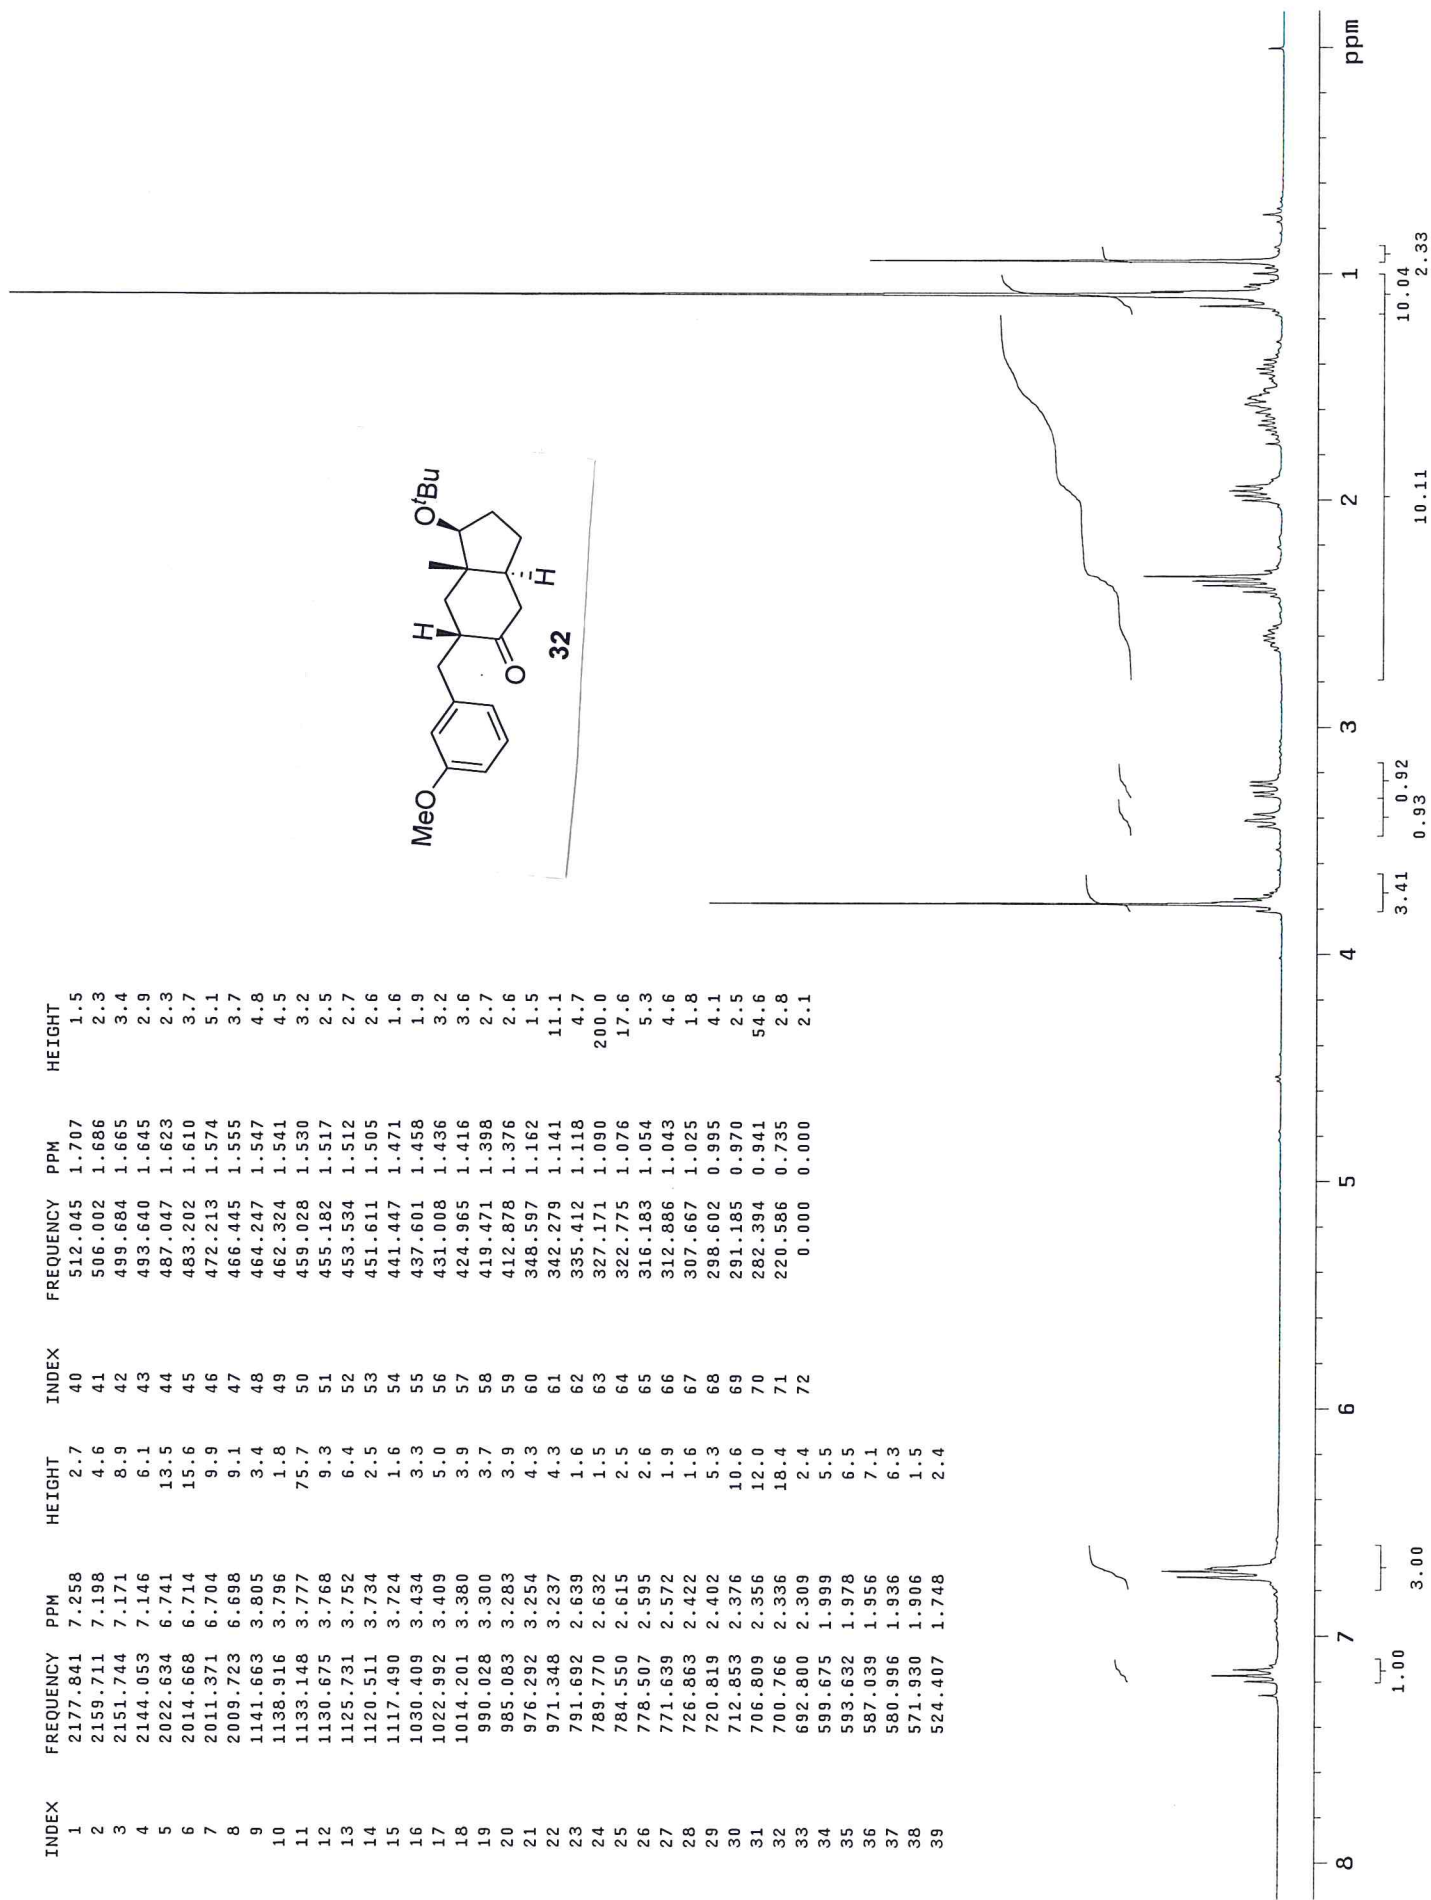

| 13C NMR | FREQUENCY | PPM     | HEIGHT |
|---------|-----------|---------|--------|
| 1       | 15985.794 | 211.881 | 4.7    |
| 2       | 15985.794 | 211.881 | 5.6    |
| 3       | 10741.947 | 142.377 | 6.1    |
| 4       | 9754.789  | 129.293 | 12.0   |
| 5       | 9183.337  | 121.719 | 13.8   |
| 6       | 8665.709  | 114.858 | 11.4   |
| 7       | 8418.346  | 111.580 | 13.0   |
| 8       | 5998.550  | 79.507  | 12.5   |
| 9       | 5857.691  | 77.640  | 10.0   |
| 10      | 5825.626  | 77.215  | 10.0   |
| 11      | 5793.560  | 76.790  | 10.4   |
| 12      | 5480.922  | 72.646  | 6.1    |
| 13      | 4167.383  | 55.236  | 10.7   |
| 14      | 3583.334  | 47.495  | 13.0   |
| 15      | 3466.524  | 45.946  | 12.7   |
| 16      | 3250.082  | 43.078  | 14.7   |
| 17      | 3224.888  | 42.744  | 15.4   |
| 18      | 2711.841  | 35.944  | 13.2   |
| 19      | 2408.364  | 31.921  | 12.4   |
| 20      | 2169.019  | 28.749  | 46.2   |
| 21      | 1949.141  | 25.835  | 12.7   |
| 22      | 847.464   | 11.233  | 12.7   |

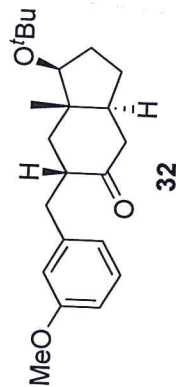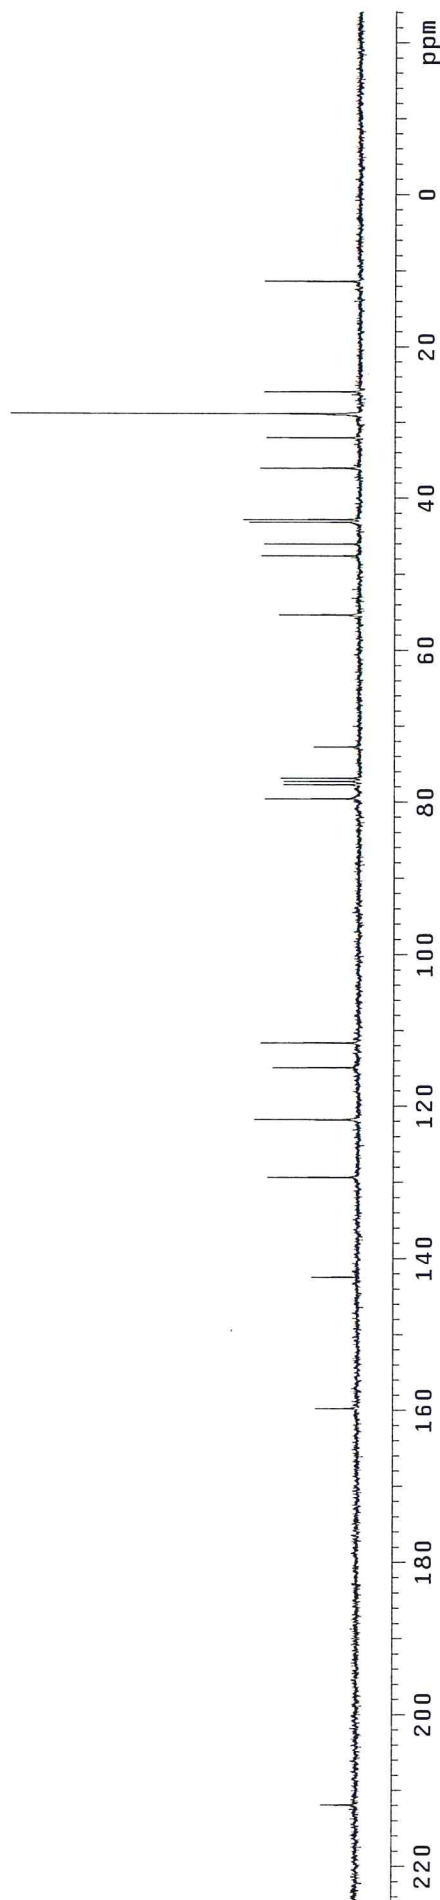

| INDEX | FREQUENCY | PPM   | HEIGHT | INDEX | FREQUENCY | PPM    | HEIGHT |
|-------|-----------|-------|--------|-------|-----------|--------|--------|
| 1     | 2199.817  | 7.332 | 10.4   | 40    | 504.079   | 1.680  | 4.8    |
| 2     | 2194.872  | 7.315 | 4.0    | 41    | 473.587   | 1.578  | 2.2    |
| 3     | 2178.116  | 7.259 | 7.4    | 42    | 460.401   | 1.534  | 3.6    |
| 4     | 2176.742  | 7.255 | 9.2    | 43    | 452.160   | 1.507  | 4.2    |
| 5     | 2163.282  | 7.210 | 4.8    | 44    | 444.469   | 1.481  | 4.2    |
| 6     | 2155.590  | 7.184 | 10.0   | 45    | 435.403   | 1.451  | 3.7    |
| 7     | 2147.898  | 7.159 | 6.0    | 46    | 429.085   | 1.430  | 3.1    |
| 8     | 2028.128  | 6.759 | 10.8   | 47    | 421.394   | 1.404  | 3.6    |
| 9     | 2024.008  | 6.746 | 8.5    | 48    | 409.581   | 1.365  | 3.8    |
| 10    | 2020.711  | 6.735 | 9.0    | 49    | 404.637   | 1.349  | 6.7    |
| 11    | 2013.569  | 6.711 | 13.1   | 50    | 399.967   | 1.333  | 7.3    |
| 12    | 1430.101  | 4.766 | 12.4   | 51    | 394.198   | 1.314  | 5.8    |
| 13    | 1407.026  | 4.689 | 13.0   | 52    | 338.708   | 1.129  | 5.0    |
| 14    | 1138.092  | 3.793 | 61.5   | 53    | 337.609   | 1.125  | 5.8    |
| 15    | 1136.719  | 3.788 | 79.2   | 54    | 319.204   | 1.064  | 171.1  |
| 16    | 1009.257  | 3.364 | 4.3    | 55    | 318.105   | 1.060  | 200.0  |
| 17    | 1001.840  | 3.339 | 7.1    | 56    | 226.080   | 0.753  | 62.9   |
| 18    | 993.324   | 3.311 | 4.2    | 57    | 213.444   | 0.711  | 8.0    |
| 19    | 938.933   | 3.129 | 3.9    | 58    | 201.632   | 0.672  | 4.0    |
| 20    | 934.812   | 3.116 | 4.4    | 59    | 1.374     | 0.005  | 4.7    |
| 21    | 926.297   | 3.087 | 4.9    | 60    | -0.000    | -0.000 | 6.3    |
| 22    | 921.901   | 3.073 | 4.0    |       |           |        |        |
| 23    | 742.246   | 2.474 | 2.9    |       |           |        |        |
| 24    | 726.313   | 2.421 | 8.7    |       |           |        |        |
| 25    | 716.973   | 2.390 | 2.8    |       |           |        |        |
| 26    | 713.402   | 2.378 | 5.7    |       |           |        |        |
| 27    | 704.612   | 2.348 | 3.2    |       |           |        |        |
| 28    | 665.055   | 2.216 | 2.4    |       |           |        |        |
| 29    | 662.308   | 2.207 | 2.8    |       |           |        |        |
| 30    | 652.144   | 2.173 | 8.0    |       |           |        |        |
| 31    | 649.397   | 2.164 | 7.1    |       |           |        |        |
| 32    | 642.529   | 2.141 | 4.0    |       |           |        |        |
| 33    | 630.717   | 2.102 | 4.5    |       |           |        |        |
| 34    | 571.930   | 1.906 | 3.0    |       |           |        |        |
| 35    | 561.217   | 1.870 | 3.0    |       |           |        |        |
| 36    | 558.470   | 1.861 | 2.6    |       |           |        |        |
| 37    | 520.012   | 1.733 | 4.7    |       |           |        |        |
| 38    | 516.441   | 1.721 | 4.4    |       |           |        |        |
| 39    | 508.474   | 1.695 | 5.2    |       |           |        |        |

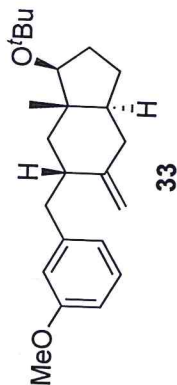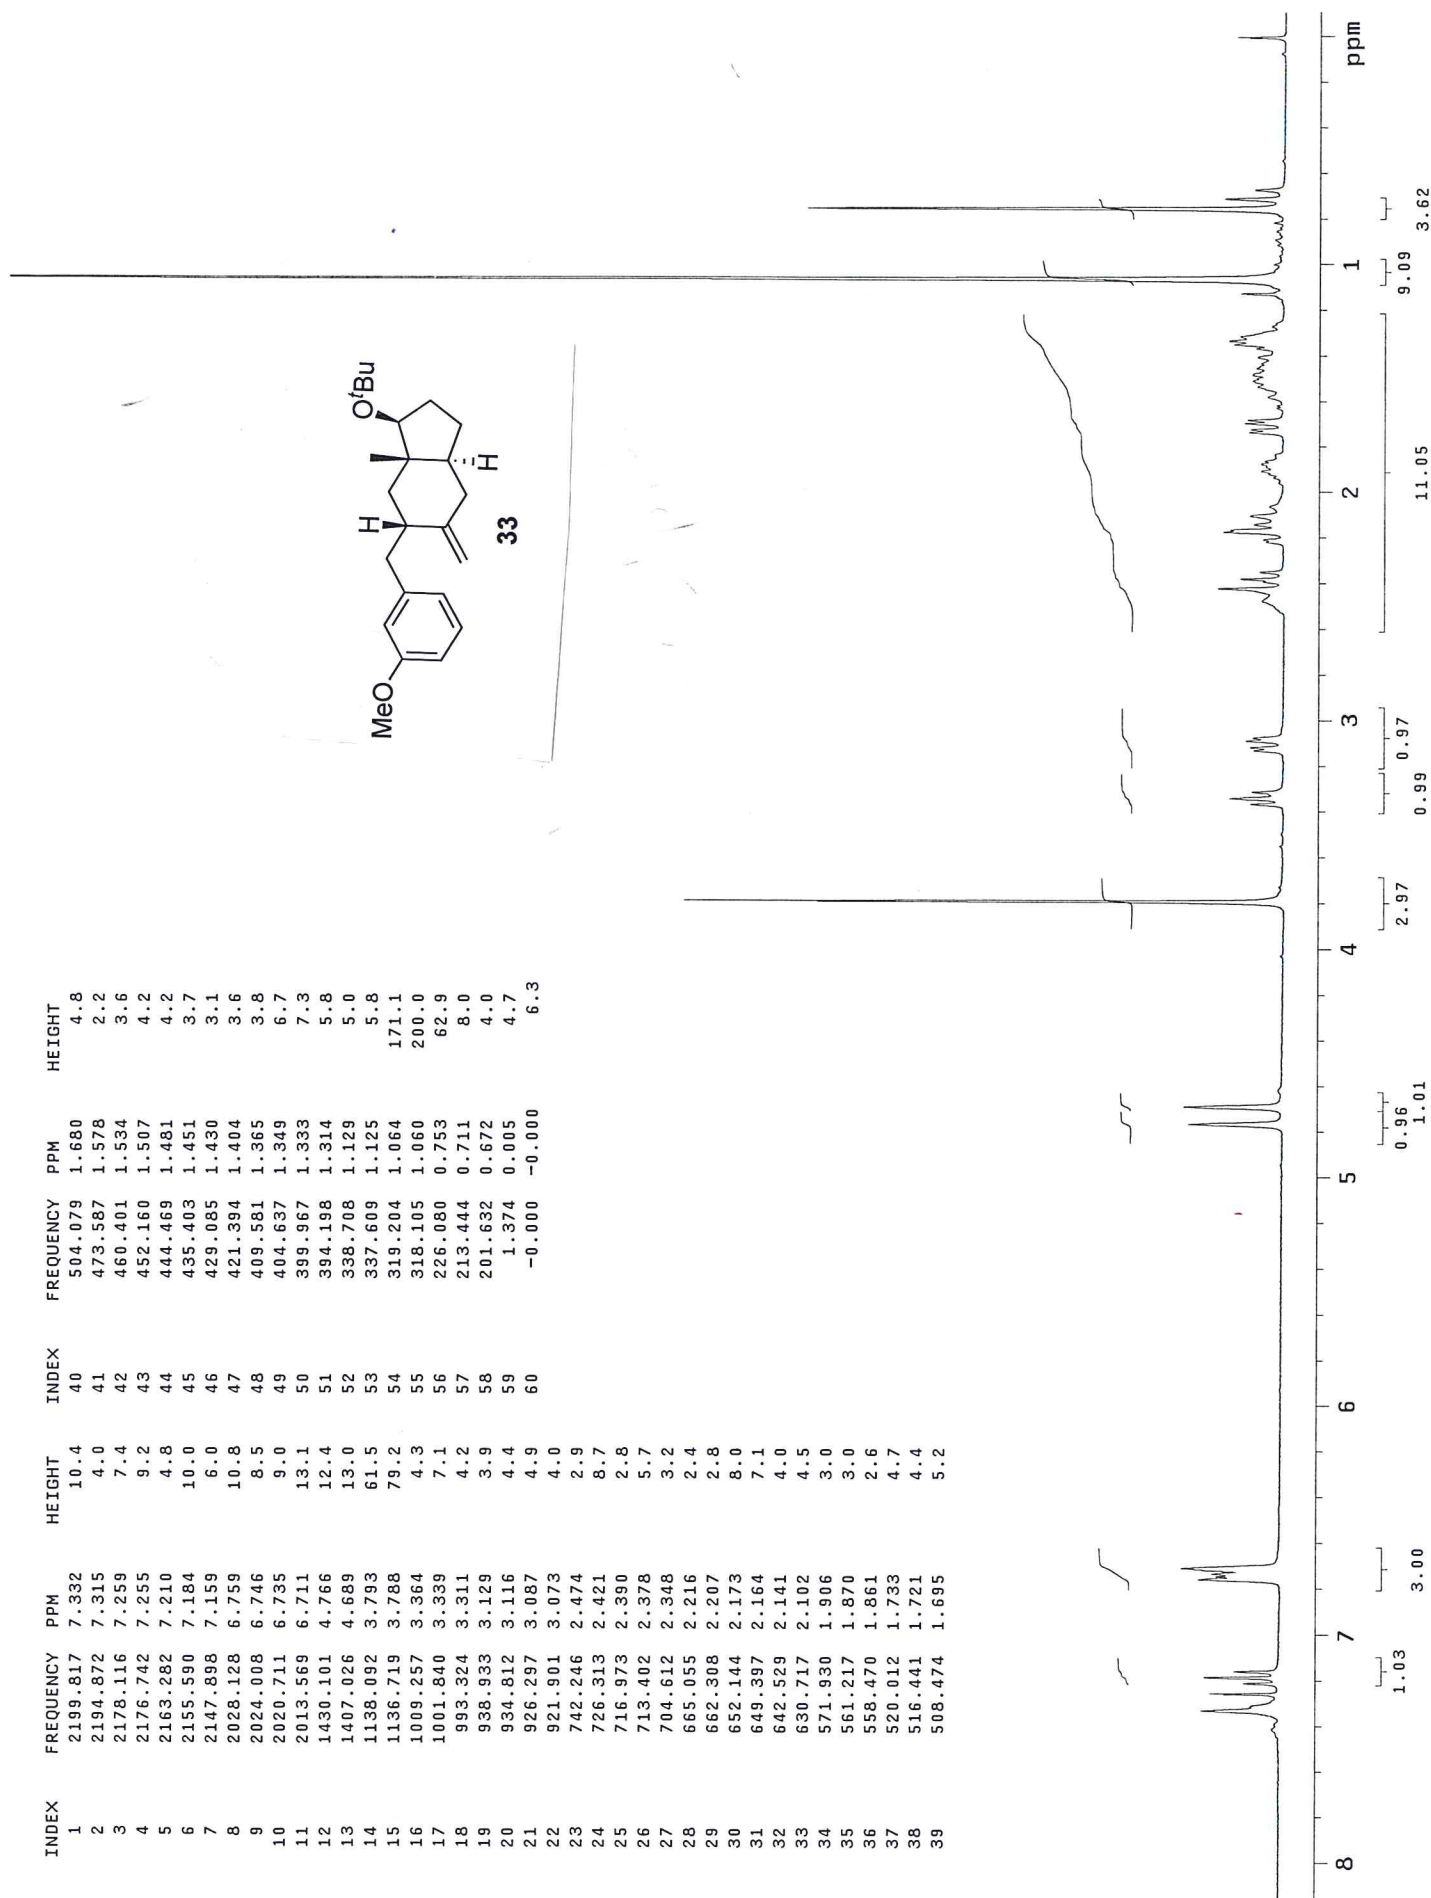

| INDEX | FREQUENCY | PPM     | HEIGHT |
|-------|-----------|---------|--------|
| 1     | 12052.049 | 159.742 | 3.7    |
| 2     | 11567.632 | 153.321 | 4.8    |
| 3     | 10802.642 | 143.182 | 4.0    |
| 4     | 9750.208  | 129.233 | 9.1    |
| 5     | 9179.901  | 121.674 | 10.0   |
| 6     | 8657.692  | 114.752 | 9.2    |
| 7     | 8401.168  | 111.352 | 8.4    |
| 8     | 8023.254  | 106.343 | 7.6    |
| 9     | 6070.697  | 80.463  | 9.0    |
| 10    | 5857.691  | 77.640  | 20.4   |
| 11    | 5825.625  | 77.215  | 21.5   |
| 12    | 5793.560  | 76.790  | 21.8   |
| 13    | 5462.598  | 72.403  | 5.7    |
| 14    | 4171.964  | 55.297  | 5.9    |
| 15    | 3573.027  | 47.358  | 10.1   |
| 16    | 3360.021  | 44.535  | 8.6    |
| 17    | 3256.953  | 43.169  | 6.3    |
| 18    | 2979.816  | 39.495  | 9.1    |
| 19    | 2931.718  | 38.858  | 11.3   |
| 20    | 2804.601  | 37.173  | 10.5   |
| 21    | 2395.767  | 31.754  | 9.7    |
| 22    | 2175.889  | 28.840  | 31.5   |
| 23    | 1945.705  | 25.789  | 8.2    |
| 24    | 870.367   | 11.536  | 9.7    |

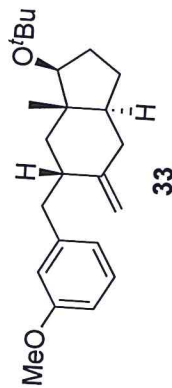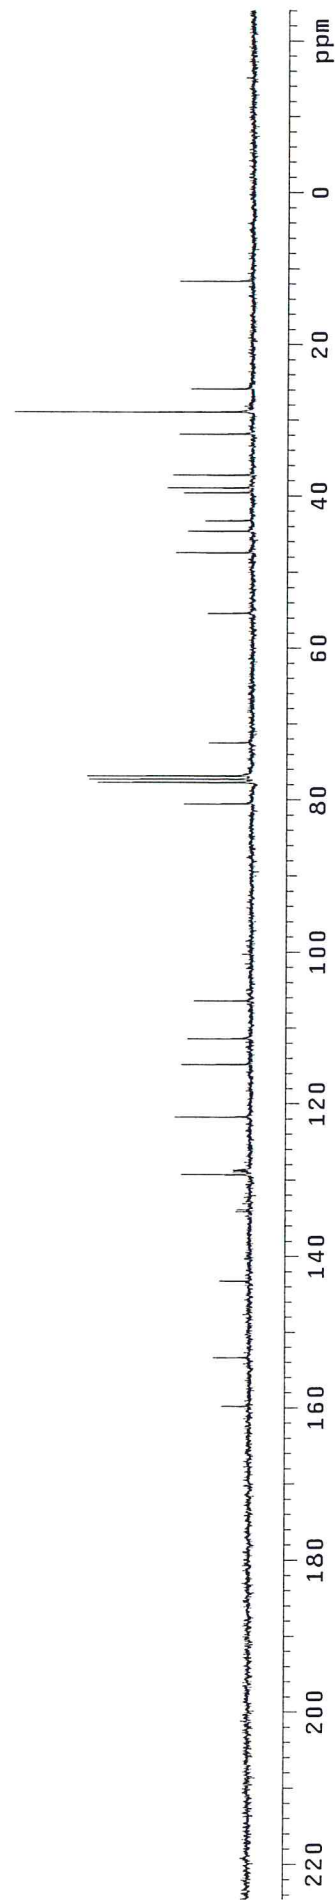

| INDEX | FREQUENCY | PPM   | HEIGHT | INDEX | FREQUENCY | PPM   | HEIGHT |
|-------|-----------|-------|--------|-------|-----------|-------|--------|
| 1     | 2176.742  | 7.255 | 2.7    | 40    | 551.328   | 1.837 | 6.2    |
| 2     | 2164.106  | 7.213 | 4.8    | 41    | 546.933   | 1.823 | 5.6    |
| 3     | 2156.689  | 7.188 | 8.1    | 42    | 528.253   | 1.761 | 5.5    |
| 4     | 2147.898  | 7.159 | 6.5    | 43    | 519.462   | 1.731 | 5.8    |
| 5     | 2032.249  | 6.773 | 9.2    | 44    | 510.122   | 1.700 | 2.9    |
| 6     | 2024.008  | 6.746 | 13.9   | 45    | 498.310   | 1.661 | 2.7    |
| 7     | 2021.810  | 6.738 | 13.1   | 46    | 493.640   | 1.645 | 2.6    |
| 8     | 2015.492  | 6.717 | 21.8   | 47    | 471.115   | 1.570 | 5.4    |
| 9     | 2002.031  | 6.672 | 3.3    | 48    | 467.818   | 1.559 | 5.6    |
| 10    | 1149.355  | 3.831 | 4.4    | 49    | 458.478   | 1.528 | 7.4    |
| 11    | 1144.410  | 3.814 | 6.3    | 50    | 455.182   | 1.517 | 7.6    |
| 12    | 1134.796  | 3.782 | 83.3   | 51    | 441.722   | 1.472 | 7.3    |
| 13    | 1132.049  | 3.773 | 26.2   | 52    | 435.403   | 1.451 | 10.0   |
| 14    | 1126.280  | 3.754 | 5.8    | 53    | 430.459   | 1.435 | 11.3   |
| 15    | 1099.909  | 3.666 | 6.5    | 54    | 425.789   | 1.419 | 10.9   |
| 16    | 1090.019  | 3.633 | 9.0    | 55    | 423.042   | 1.410 | 11.6   |
| 17    | 1086.448  | 3.621 | 4.8    | 56    | 414.251   | 1.381 | 12.0   |
| 18    | 1079.581  | 3.598 | 4.4    | 57    | 396.670   | 1.322 | 5.1    |
| 19    | 1026.014  | 3.420 | 4.2    | 58    | 387.330   | 1.291 | 4.8    |
| 20    | 1018.597  | 3.395 | 6.7    | 59    | 382.111   | 1.274 | 6.0    |
| 21    | 1010.081  | 3.366 | 5.0    | 60    | 376.892   | 1.256 | 8.5    |
| 22    | 793.341   | 2.644 | 3.2    | 61    | 370.574   | 1.235 | 6.2    |
| 23    | 785.374   | 2.617 | 3.7    | 62    | 360.684   | 1.202 | 2.8    |
| 24    | 779.606   | 2.598 | 5.6    | 63    | 346.125   | 1.154 | 5.7    |
| 25    | 771.914   | 2.573 | 5.9    | 64    | 331.566   | 1.105 | 200.0  |
| 26    | 743.894   | 2.479 | 4.9    | 65    | 320.852   | 1.069 | 48.3   |
| 27    | 736.477   | 2.455 | 5.9    | 66    | 289.536   | 0.965 | 5.0    |
| 28    | 730.434   | 2.434 | 3.1    | 67    | 276.900   | 0.923 | 8.5    |
| 29    | 722.742   | 2.409 | 3.7    | 68    | 264.264   | 0.881 | 5.3    |
| 30    | 661.209   | 2.204 | 2.9    | 69    | 244.485   | 0.815 | 3.5    |
| 31    | 657.638   | 2.192 | 3.0    | 70    | 217.015   | 0.723 | 63.1   |
| 32    | 653.517   | 2.178 | 3.1    | 71    | 210.422   | 0.701 | 3.3    |
| 33    | 649.397   | 2.164 | 2.9    | 72    | 186.798   | 0.623 | 14.2   |
| 34    | 645.276   | 2.151 | 2.8    |       |           |       |        |
| 35    | 610.389   | 2.034 | 2.8    |       |           |       |        |
| 36    | 568.909   | 1.896 | 4.0    |       |           |       |        |
| 37    | 564.514   | 1.881 | 4.8    |       |           |       |        |
| 38    | 560.118   | 1.867 | 6.5    |       |           |       |        |
| 39    | 555.723   | 1.852 | 7.6    |       |           |       |        |

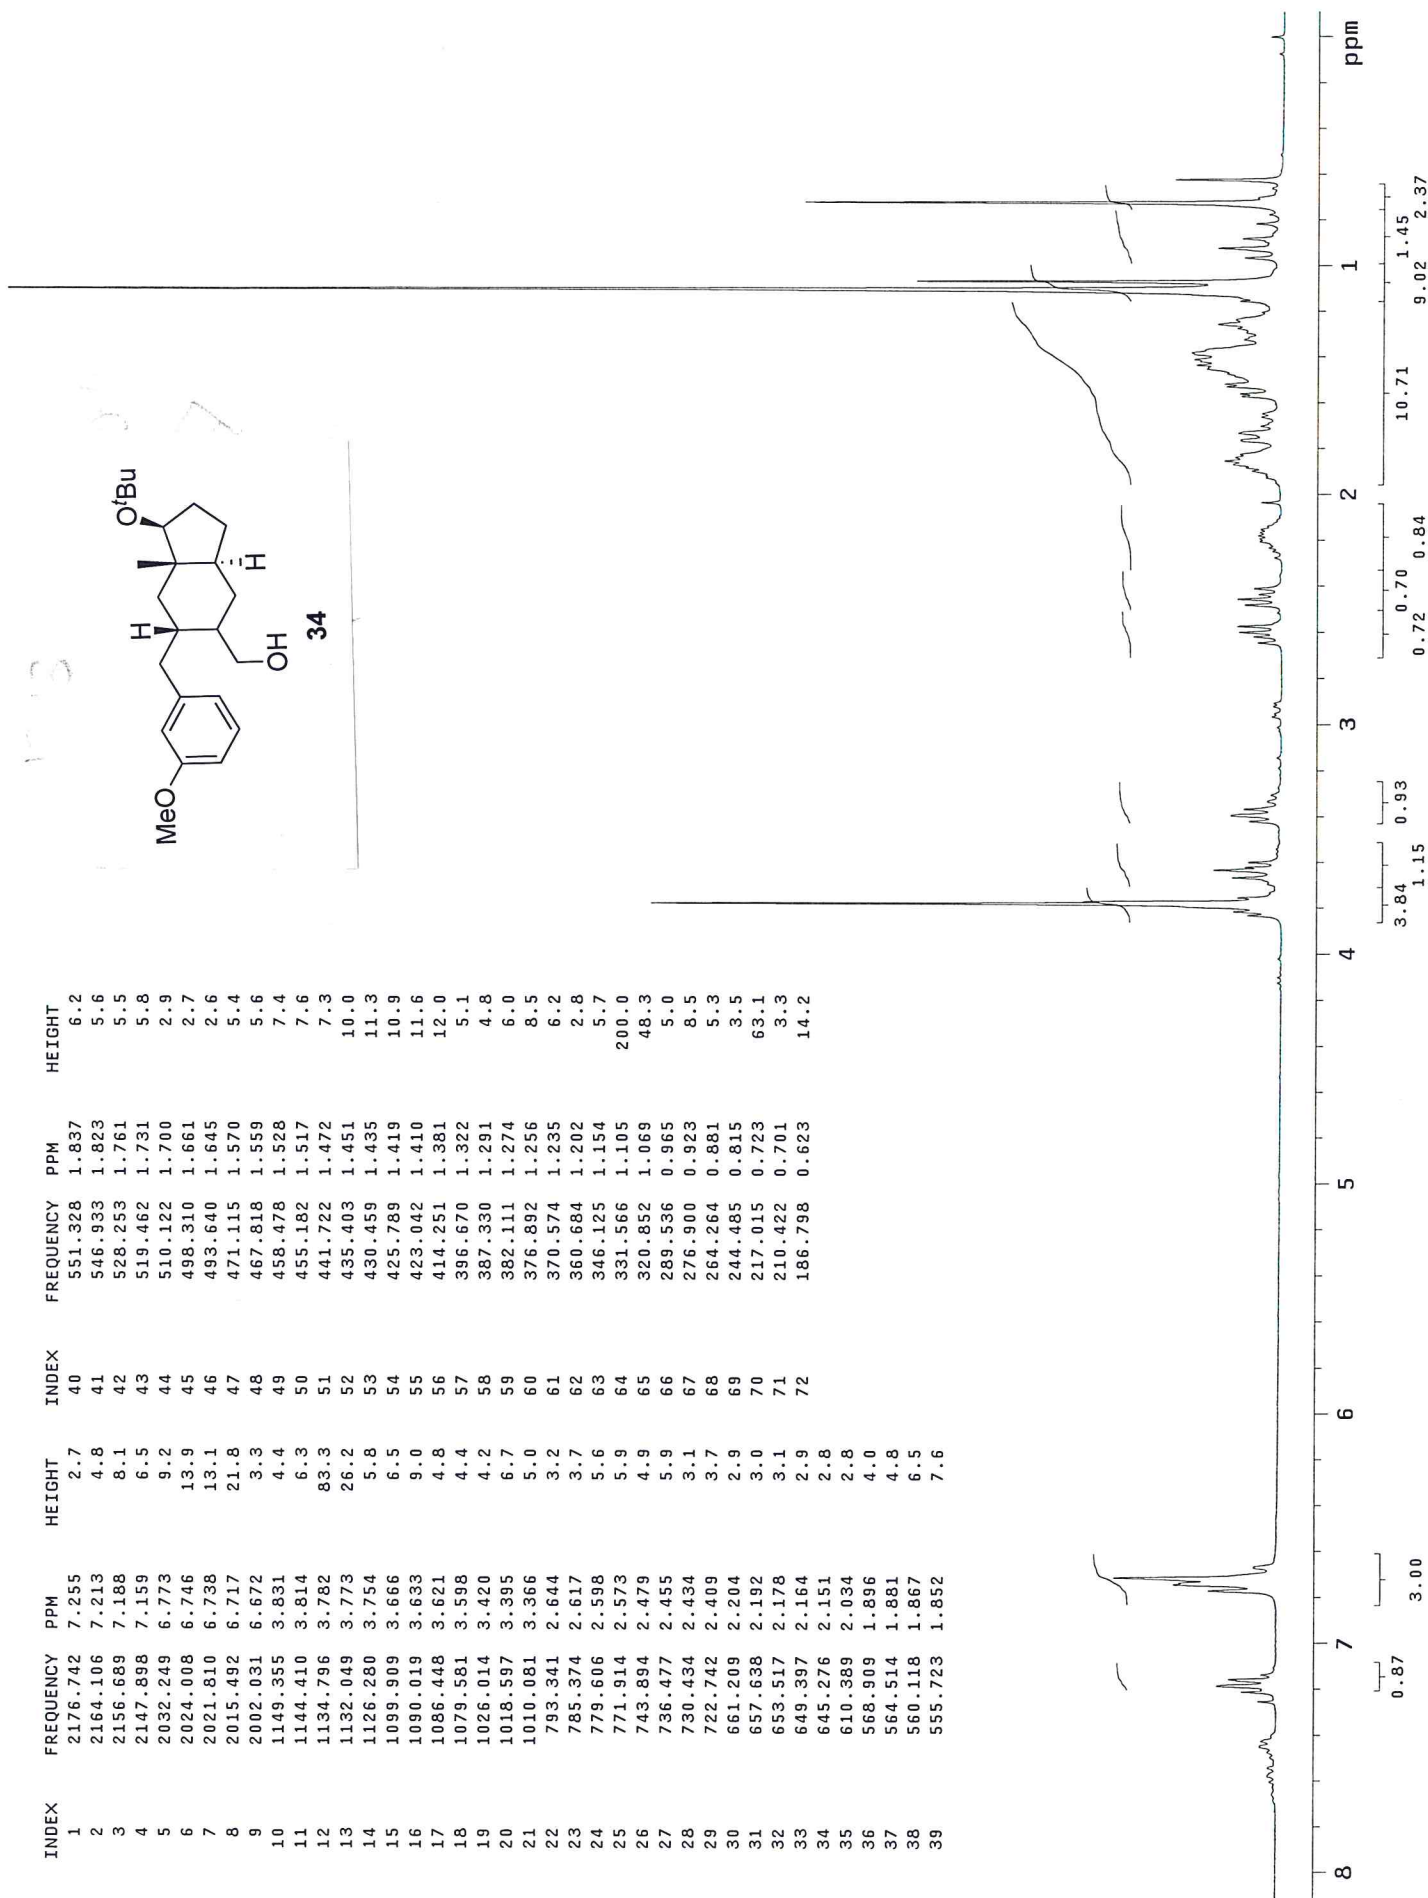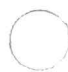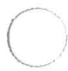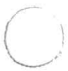



| INDEX | FREQUENCY | PPM     | HEIGHT |
|-------|-----------|---------|--------|
| 1     | 12053.195 | 159.757 | 3.7    |
| 2     | 10788.900 | 143.000 | 5.3    |
| 3     | 9757.079  | 129.324 | 7.6    |
| 4     | 9162.723  | 121.446 | 8.4    |
| 5     | 8661.128  | 114.798 | 7.8    |
| 6     | 8389.717  | 111.200 | 6.9    |
| 7     | 6107.343  | 80.949  | 8.9    |
| 8     | 5857.691  | 77.640  | 6.8    |
| 9     | 5825.626  | 77.215  | 7.0    |
| 10    | 5793.560  | 76.790  | 7.2    |
| 11    | 5454.582  | 72.297  | 5.9    |
| 12    | 4554.459  | 60.366  | 5.9    |
| 13    | 4169.674  | 55.266  | 6.8    |
| 14    | 3264.970  | 43.275  | 5.8    |
| 15    | 3049.673  | 40.421  | 8.7    |
| 16    | 3047.383  | 40.391  | 10.4   |
| 17    | 3000.430  | 39.769  | 7.7    |
| 18    | 2943.170  | 39.010  | 9.0    |
| 19    | 2773.681  | 36.763  | 9.4    |
| 20    | 2369.428  | 31.405  | 8.7    |
| 21    | 2179.325  | 28.886  | 26.4   |
| 22    | 2173.599  | 28.810  | 8.3    |
| 23    | 2009.837  | 26.639  | 7.7    |
| 24    | 1957.158  | 25.941  | 9.0    |
| 25    | 858.916   | 11.384  | 9.3    |

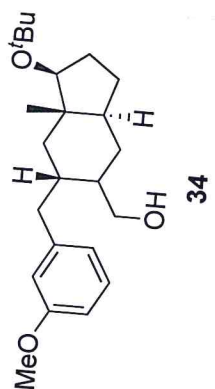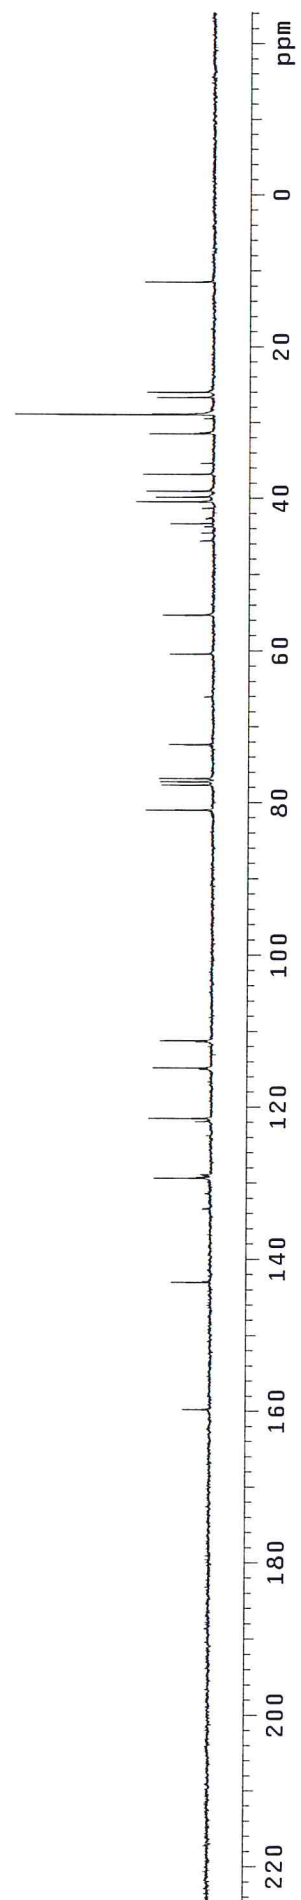

| INDEX | FREQUENCY | PPM   | HEIGHT | INDEX | FREQUENCY | PPM   | HEIGHT | INDEX | FREQUENCY | PPM   | HEIGHT |
|-------|-----------|-------|--------|-------|-----------|-------|--------|-------|-----------|-------|--------|
| 1     | 2906.901  | 9.688 | 8.7    | 40    | 586.215   | 1.954 | 14.2   | 79    | 293.932   | 0.980 | 2.1    |
| 2     | 2905.802  | 9.684 | 11.8   | 41    | 549.130   | 1.830 | 2.0    | 80    | 292.558   | 0.975 | 2.0    |
| 3     | 2904.429  | 9.680 | 6.4    | 42    | 543.911   | 1.813 | 4.5    | 81    | 202.456   | 0.675 | 50.2   |
| 4     | 2155.865  | 7.185 | 1.8    | 43    | 541.713   | 1.805 | 4.5    | 82    | 197.236   | 0.657 | 2.3    |
| 5     | 2138.833  | 7.128 | 4.8    | 44    | 539.790   | 1.799 | 4.2    | 83    | 190.643   | 0.635 | 2.6    |
| 6     | 2131.142  | 7.103 | 7.6    | 45    | 535.120   | 1.783 | 3.0    | 84    | 180.480   | 0.602 | 2.5    |
| 7     | 2123.175  | 7.076 | 5.6    | 46    | 530.450   | 1.768 | 5.5    | 85    | 0.000     | 0.000 | 3.9    |
| 8     | 2001.207  | 6.670 | 6.2    | 47    | 528.527   | 1.761 | 4.8    |       |           |       |        |
| 9     | 1998.460  | 6.660 | 9.5    | 48    | 498.310   | 1.661 | 3.0    |       |           |       |        |
| 10    | 1996.812  | 6.655 | 7.3    | 49    | 494.739   | 1.649 | 2.9    |       |           |       |        |
| 11    | 1992.966  | 6.642 | 5.8    | 50    | 485.674   | 1.619 | 3.6    |       |           |       |        |
| 12    | 1990.494  | 6.634 | 9.5    | 51    | 482.103   | 1.607 | 3.2    |       |           |       |        |
| 13    | 1983.901  | 6.612 | 7.9    | 52    | 439.249   | 1.464 | 1.9    |       |           |       |        |
| 14    | 1982.253  | 6.606 | 7.4    | 53    | 433.480   | 1.445 | 2.7    |       |           |       |        |
| 15    | 1213.635  | 4.045 | 2.8    | 54    | 426.063   | 1.420 | 4.3    |       |           |       |        |
| 16    | 1206.493  | 4.021 | 2.8    | 55    | 420.569   | 1.402 | 6.0    |       |           |       |        |
| 17    | 1111.721  | 3.705 | 9.3    | 56    | 415.625   | 1.385 | 5.3    |       |           |       |        |
| 18    | 1108.974  | 3.696 | 84.7   | 57    | 412.603   | 1.375 | 5.6    |       |           |       |        |
| 19    | 1009.257  | 3.364 | 3.5    | 58    | 407.384   | 1.358 | 4.2    |       |           |       |        |
| 20    | 1001.840  | 3.339 | 4.9    | 59    | 405.186   | 1.350 | 3.1    |       |           |       |        |
| 21    | 1000.466  | 3.334 | 4.1    | 60    | 402.988   | 1.343 | 2.7    |       |           |       |        |
| 22    | 993.049   | 3.310 | 3.4    | 61    | 399.417   | 1.331 | 2.4    |       |           |       |        |
| 23    | 863.115   | 2.877 | 2.7    | 62    | 396.670   | 1.322 | 2.2    |       |           |       |        |
| 24    | 853.775   | 2.845 | 3.3    | 63    | 392.000   | 1.306 | 1.8    |       |           |       |        |
| 25    | 849.655   | 2.832 | 4.2    | 64    | 389.803   | 1.299 | 1.9    |       |           |       |        |
| 26    | 840.315   | 2.801 | 4.3    | 65    | 384.309   | 1.281 | 3.9    |       |           |       |        |
| 27    | 803.779   | 2.679 | 3.7    | 66    | 377.991   | 1.260 | 2.2    |       |           |       |        |
| 28    | 797.186   | 2.657 | 4.1    | 67    | 371.672   | 1.239 | 6.8    |       |           |       |        |
| 29    | 790.044   | 2.633 | 2.5    | 68    | 366.178   | 1.220 | 3.1    |       |           |       |        |
| 30    | 783.726   | 2.612 | 2.6    | 69    | 358.487   | 1.195 | 9.4    |       |           |       |        |
| 31    | 766.695   | 2.555 | 6.5    | 70    | 354.916   | 1.183 | 6.5    |       |           |       |        |
| 32    | 711.754   | 2.372 | 1.8    | 71    | 353.542   | 1.178 | 6.5    |       |           |       |        |
| 33    | 703.513   | 2.345 | 6.2    | 72    | 351.344   | 1.171 | 12.4   |       |           |       |        |
| 34    | 699.392   | 2.331 | 2.5    | 73    | 344.202   | 1.147 | 6.3    |       |           |       |        |
| 35    | 652.144   | 2.173 | 3.0    | 74    | 342.005   | 1.140 | 2.8    |       |           |       |        |
| 36    | 630.167   | 2.100 | 1.9    | 75    | 312.062   | 1.040 | 200.0  |       |           |       |        |
| 37    | 627.695   | 2.092 | 1.9    | 76    | 307.392   | 1.024 | 12.4   |       |           |       |        |
| 38    | 626.047   | 2.086 | 1.9    | 77    | 306.293   | 1.021 | 10.6   |       |           |       |        |
| 39    | 618.905   | 2.063 | 1.8    | 78    | 303.821   | 1.013 | 11.6   |       |           |       |        |

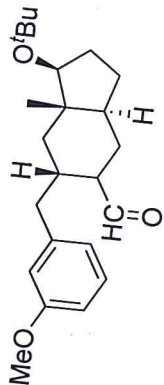

35

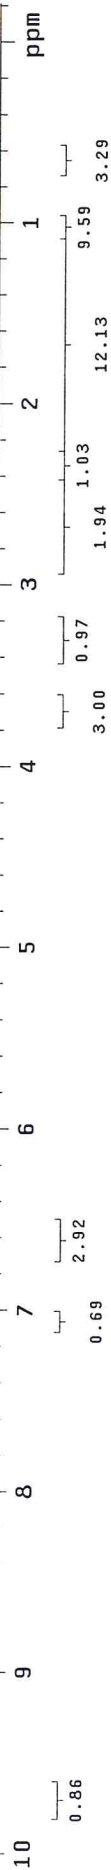

| INDEX | FREQUENCY | PPM     | HEIGHT |
|-------|-----------|---------|--------|
| 1     | 15470.456 | 205.051 | 8.6    |
| 2     | 12057.776 | 159.818 | 5.6    |
| 3     | 10762.560 | 142.651 | 7.8    |
| 4     | 9767.386  | 129.460 | 13.8   |
| 5     | 9158.142  | 121.385 | 15.3   |
| 6     | 8654.257  | 114.706 | 14.1   |
| 7     | 8404.604  | 111.397 | 12.1   |
| 8     | 6076.423  | 80.539  | 14.6   |
| 9     | 5857.691  | 77.640  | 5.2    |
| 10    | 5825.626  | 77.215  | 5.0    |
| 11    | 5794.705  | 76.805  | 4.8    |
| 12    | 5460.309  | 72.373  | 7.0    |
| 13    | 4165.093  | 55.206  | 14.8   |
| 14    | 3727.629  | 49.407  | 14.0   |
| 15    | 3258.099  | 43.184  | 11.0   |
| 16    | 3126.402  | 41.438  | 12.1   |
| 17    | 3094.336  | 41.013  | 16.5   |
| 18    | 2998.140  | 39.738  | 12.6   |
| 19    | 2779.408  | 36.839  | 14.2   |
| 20    | 2357.976  | 31.253  | 14.5   |
| 21    | 2178.180  | 28.870  | 44.9   |
| 22    | 1947.996  | 25.819  | 13.6   |
| 23    | 1918.221  | 25.425  | 12.2   |
| 24    | 852.045   | 11.293  | 12.7   |

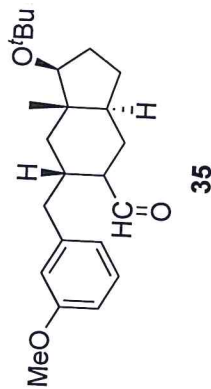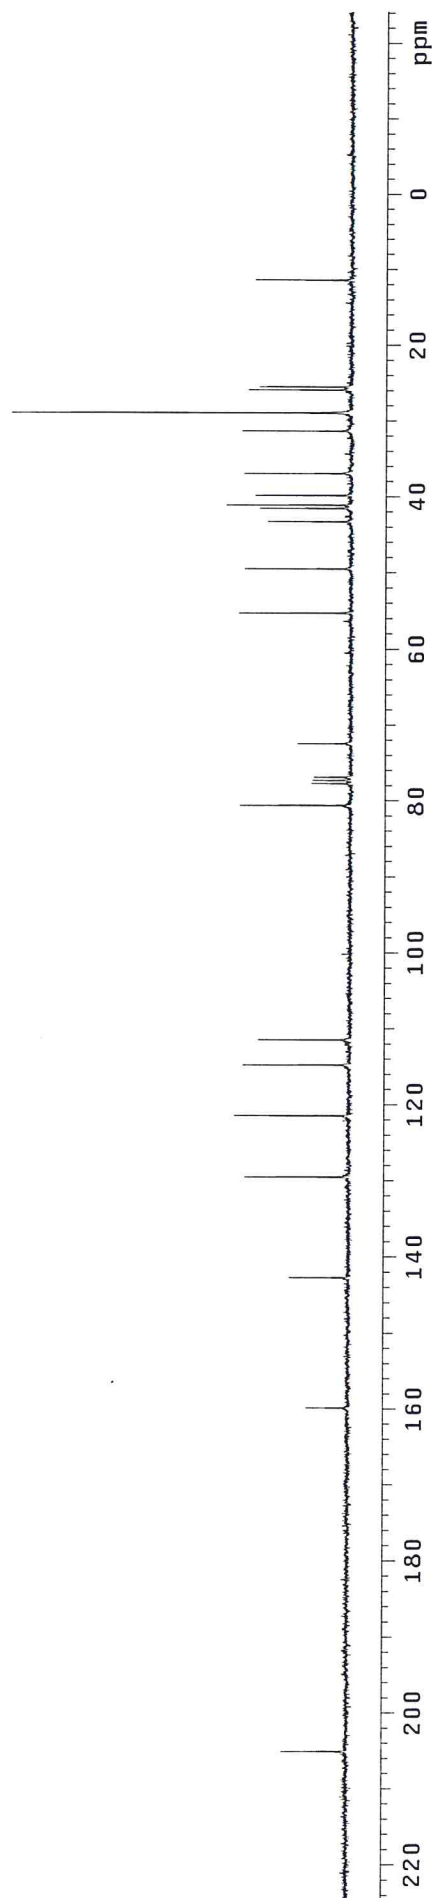

P

| INDEX | FREQUENCY | PPM   | HEIGHT | INDEX | FREQUENCY | PPM   | HEIGHT |
|-------|-----------|-------|--------|-------|-----------|-------|--------|
| 1     | 2170.149  | 7.233 | 1.1    | 40    | 484.300   | 1.614 | 1.3    |
| 2     | 2067.411  | 6.890 | 4.0    | 41    | 480.729   | 1.602 | 2.0    |
| 3     | 2061.917  | 6.872 | 1.7    | 42    | 477.708   | 1.592 | 2.0    |
| 4     | 2058.620  | 6.861 | 5.0    | 43    | 471.389   | 1.571 | 2.2    |
| 5     | 1999.559  | 6.664 | 2.5    | 44    | 466.719   | 1.555 | 1.9    |
| 6     | 1997.087  | 6.656 | 5.2    | 45    | 460.951   | 1.536 | 2.1    |
| 7     | 1991.043  | 6.636 | 8.4    | 46    | 457.105   | 1.523 | 2.1    |
| 8     | 1839.682  | 6.131 | 5.2    | 47    | 455.182   | 1.517 | 1.9    |
| 9     | 1141.389  | 3.804 | 2.9    | 48    | 449.413   | 1.498 | 2.2    |
| 10    | 1134.796  | 3.782 | 2.3    | 49    | 446.391   | 1.488 | 2.3    |
| 11    | 1129.576  | 3.765 | 41.0   | 50    | 444.194   | 1.480 | 2.1    |
| 12    | 1032.881  | 3.442 | 2.5    | 51    | 441.722   | 1.472 | 1.9    |
| 13    | 1025.189  | 3.417 | 3.9    | 52    | 434.579   | 1.448 | 2.6    |
| 14    | 1016.948  | 3.389 | 2.2    | 53    | 430.184   | 1.434 | 2.3    |
| 15    | 826.854   | 2.756 | 1.7    | 54    | 421.943   | 1.406 | 2.3    |
| 16    | 822.459   | 2.741 | 2.4    | 55    | 417.548   | 1.392 | 3.2    |
| 17    | 814.218   | 2.714 | 2.6    | 56    | 409.032   | 1.363 | 2.5    |
| 18    | 809.548   | 2.698 | 2.6    | 57    | 403.538   | 1.345 | 2.3    |
| 19    | 778.781   | 2.596 | 1.6    | 58    | 397.769   | 1.326 | 1.9    |
| 20    | 762.849   | 2.542 | 4.0    | 59    | 392.275   | 1.307 | 1.7    |
| 21    | 749.938   | 2.499 | 2.7    | 60    | 386.506   | 1.288 | 1.4    |
| 22    | 735.653   | 2.452 | 1.1    | 61    | 376.342   | 1.254 | 1.8    |
| 23    | 708.732   | 2.362 | 1.5    | 62    | 368.101   | 1.227 | 1.7    |
| 24    | 704.886   | 2.349 | 1.6    | 63    | 345.026   | 1.150 | 109.7  |
| 25    | 693.624   | 2.312 | 3.0    | 64    | 331.291   | 1.104 | 2.0    |
| 26    | 689.503   | 2.298 | 2.9    | 65    | 325.522   | 1.085 | 1.1    |
| 27    | 668.900   | 2.229 | 1.9    | 66    | 283.218   | 0.944 | 2.7    |
| 28    | 656.264   | 2.187 | 2.2    | 67    | 271.681   | 0.905 | 3.6    |
| 29    | 641.430   | 2.138 | 1.2    | 68    | 264.538   | 0.882 | 1.4    |
| 30    | 626.322   | 2.087 | 2.4    | 69    | 260.418   | 0.868 | 2.4    |
| 31    | 621.377   | 2.071 | 2.2    | 70    | 231.299   | 0.771 | 31.8   |
| 32    | 614.235   | 2.047 | 2.8    |       |           |       |        |
| 33    | 608.741   | 2.029 | 2.4    |       |           |       |        |
| 34    | 587.039   | 1.956 | 1.4    |       |           |       |        |
| 35    | 581.820   | 1.939 | 1.7    |       |           |       |        |
| 36    | 577.699   | 1.925 | 1.8    |       |           |       |        |
| 37    | 572.755   | 1.909 | 1.4    |       |           |       |        |
| 38    | 568.909   | 1.896 | 1.6    |       |           |       |        |
| 39    | 487.322   | 1.624 | 1.2    |       |           |       |        |

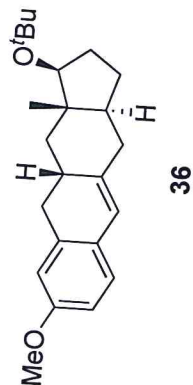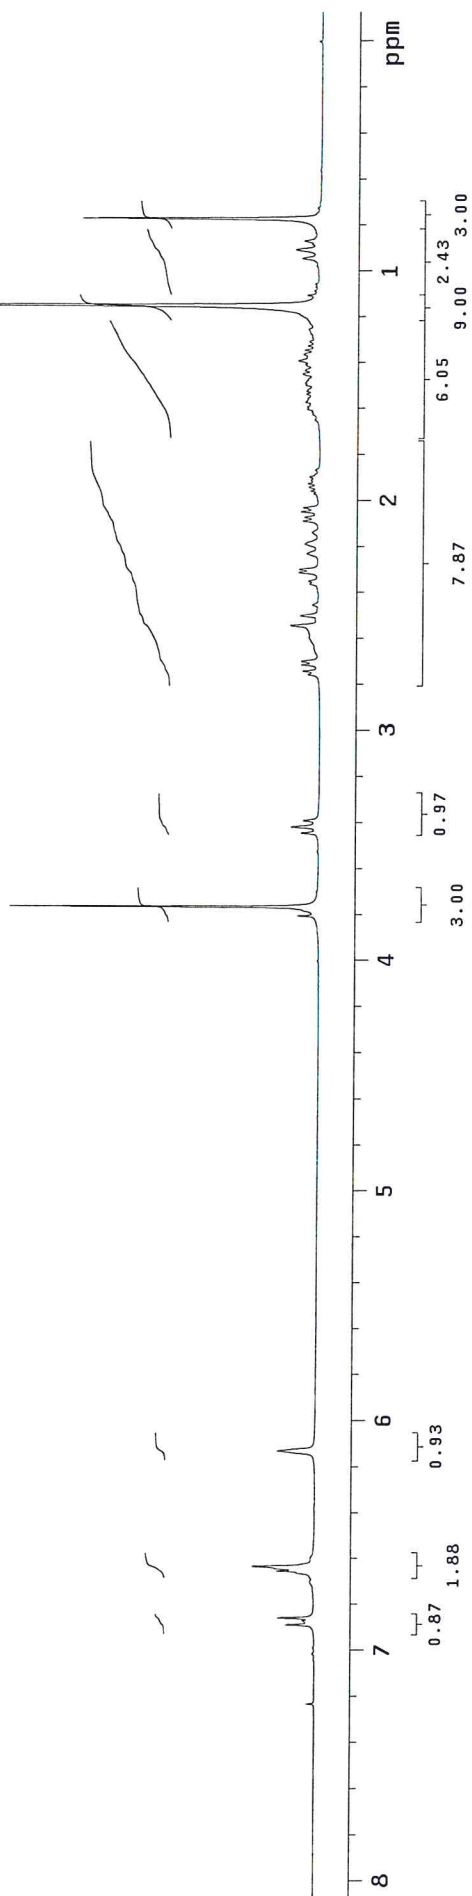

| INDEX | FREQUENCY | PPM     | HEIGHT |
|-------|-----------|---------|--------|
| 1     | 11935.240 | 158.194 | 4.9    |
| 2     | 10598.797 | 140.480 | 7.2    |
| 3     | 10309.063 | 136.640 | 6.1    |
| 4     | 9672.335  | 128.200 | 5.8    |
| 5     | 9509.717  | 126.045 | 12.9   |
| 6     | 9224.564  | 122.266 | 13.5   |
| 7     | 8559.205  | 113.447 | 13.2   |
| 8     | 8383.991  | 111.124 | 11.0   |
| 9     | 6076.423  | 80.539  | 11.6   |
| 10    | 5857.691  | 77.640  | 6.0    |
| 11    | 5825.625  | 77.215  | 6.6    |
| 12    | 5793.560  | 76.790  | 6.3    |
| 13    | 5463.744  | 72.418  | 7.6    |
| 14    | 4179.981  | 55.403  | 11.2   |
| 15    | 3437.894  | 45.567  | 10.6   |
| 16    | 3350.860  | 44.413  | 13.0   |
| 17    | 3261.534  | 43.229  | 7.1    |
| 18    | 2837.812  | 37.613  | 13.2   |
| 19    | 2592.741  | 34.365  | 12.6   |
| 20    | 2475.931  | 32.817  | 14.4   |
| 21    | 2379.734  | 31.542  | 12.0   |
| 22    | 2186.196  | 28.977  | 40.0   |
| 23    | 1958.303  | 25.956  | 14.1   |
| 24    | 823.415   | 10.914  | 12.7   |

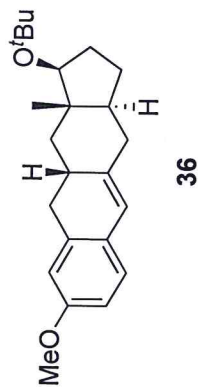

36

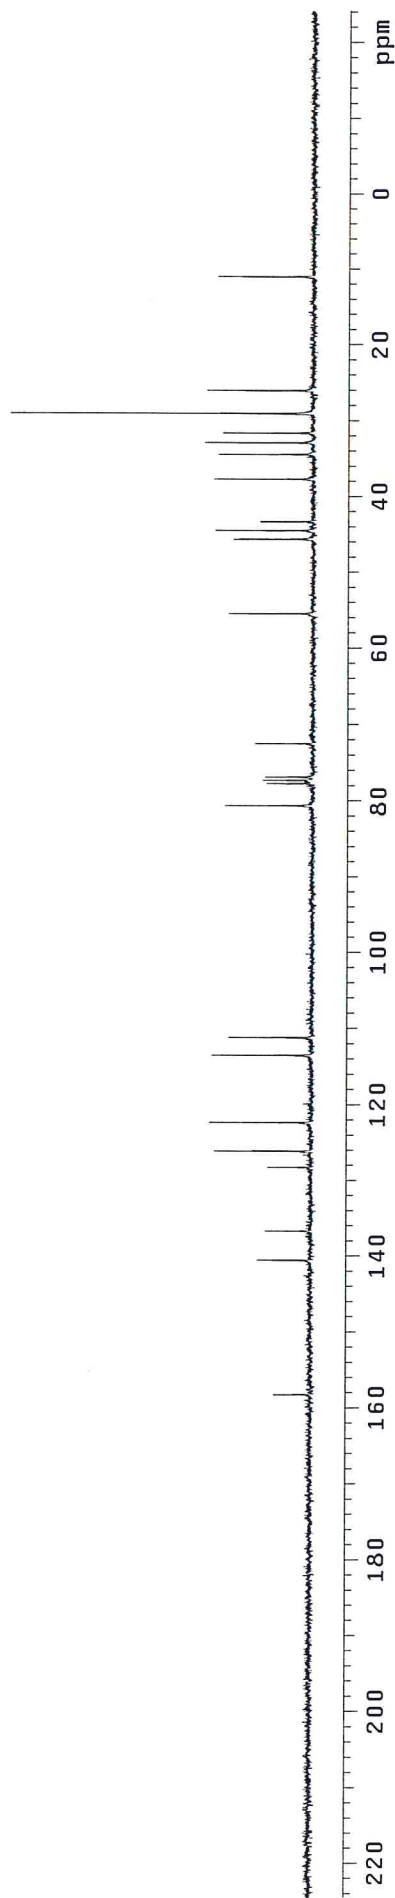

| INDEX | FREQUENCY | PPM   | HEIGHT | INDEX | FREQUENCY | PPM   | HEIGHT |
|-------|-----------|-------|--------|-------|-----------|-------|--------|
| 1     | 2155.954  | 7.185 | 2.6    | 40    | 470.929   | 1.570 | 6.3    |
| 2     | 2154.855  | 7.182 | 2.4    | 41    | 465.160   | 1.550 | 9.4    |
| 3     | 2076.290  | 6.920 | 16.9   | 42    | 459.666   | 1.532 | 7.0    |
| 4     | 2068.049  | 6.892 | 19.1   | 43    | 456.095   | 1.520 | 7.2    |
| 5     | 1989.484  | 6.631 | 12.8   | 44    | 452.249   | 1.507 | 5.1    |
| 6     | 1987.012  | 6.622 | 13.3   | 45    | 438.514   | 1.461 | 3.7    |
| 7     | 1980.968  | 6.602 | 10.3   | 46    | 427.526   | 1.425 | 6.8    |
| 8     | 1978.496  | 6.594 | 11.2   | 47    | 419.560   | 1.398 | 8.1    |
| 9     | 1963.388  | 6.544 | 23.5   | 48    | 416.263   | 1.387 | 8.2    |
| 10    | 1110.162  | 3.700 | 149.4  | 49    | 407.473   | 1.358 | 13.2   |
| 11    | 1109.063  | 3.696 | 150.0  | 50    | 404.176   | 1.347 | 16.6   |
| 12    | 1101.371  | 3.671 | 9.7    | 51    | 399.781   | 1.332 | 15.3   |
| 13    | 1093.130  | 3.643 | 14.6   | 52    | 395.386   | 1.318 | 20.0   |
| 14    | 1084.889  | 3.616 | 9.0    | 53    | 389.617   | 1.299 | 15.7   |
| 15    | 817.054   | 2.723 | 8.2    | 54    | 384.123   | 1.280 | 9.7    |
| 16    | 812.659   | 2.708 | 14.0   | 55    | 378.080   | 1.260 | 10.1   |
| 17    | 807.989   | 2.693 | 8.9    | 56    | 373.135   | 1.244 | 6.6    |
| 18    | 800.847   | 2.669 | 12.7   | 57    | 366.268   | 1.221 | 5.3    |
| 19    | 796.177   | 2.654 | 19.7   | 58    | 362.971   | 1.210 | 5.7    |
| 20    | 791.507   | 2.638 | 10.8   | 59    | 347.038   | 1.157 | 6.5    |
| 21    | 737.116   | 2.457 | 7.8    | 60    | 335.501   | 1.118 | 10.5   |
| 22    | 724.480   | 2.415 | 15.1   | 61    | 323.689   | 1.079 | 8.0    |
| 23    | 711.019   | 2.370 | 11.9   | 62    | 312.426   | 1.041 | 2.9    |
| 24    | 695.636   | 2.318 | 5.7    | 63    | 256.936   | 0.856 | 9.3    |
| 25    | 621.741   | 2.072 | 3.1    | 64    | 244.849   | 0.816 | 15.9   |
| 26    | 613.500   | 2.045 | 6.7    | 65    | 237.157   | 0.790 | 4.4    |
| 27    | 608.555   | 2.028 | 4.9    | 66    | 232.762   | 0.776 | 10.0   |
| 28    | 604.984   | 2.016 | 7.5    | 67    | 220.950   | 0.736 | 117.2  |
| 29    | 600.314   | 2.001 | 5.5    |       |           |       |        |
| 30    | 597.292   | 1.991 | 3.8    |       |           |       |        |
| 31    | 573.668   | 1.912 | 9.7    |       |           |       |        |
| 32    | 569.822   | 1.899 | 10.3   |       |           |       |        |
| 33    | 561.306   | 1.871 | 10.7   |       |           |       |        |
| 34    | 557.460   | 1.858 | 10.9   |       |           |       |        |
| 35    | 537.407   | 1.791 | 14.7   |       |           |       |        |
| 36    | 494.828   | 1.649 | 11.8   |       |           |       |        |
| 37    | 482.741   | 1.609 | 14.4   |       |           |       |        |
| 38    | 479.170   | 1.597 | 12.7   |       |           |       |        |
| 39    | 473.951   | 1.580 | 6.2    |       |           |       |        |

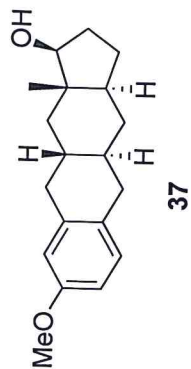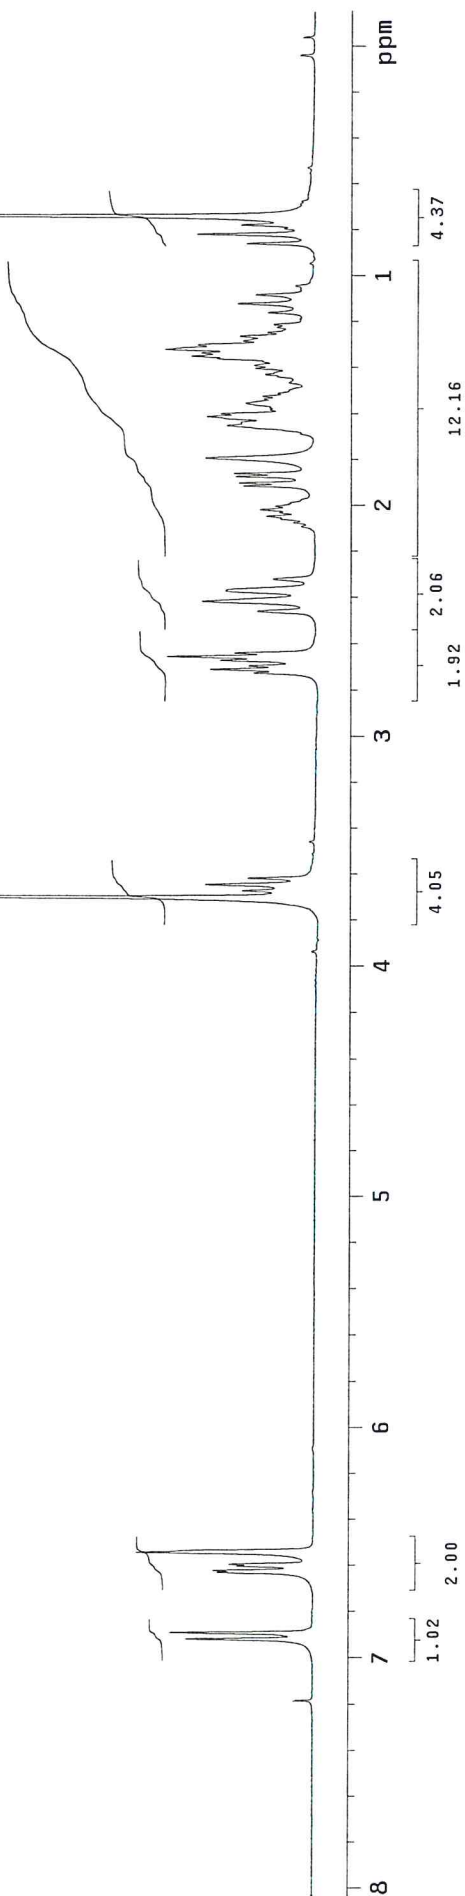



| INDEX | FREQUENCY | PPM     | HEIGHT |
|-------|-----------|---------|--------|
| 1     | 11887.142 | 157.556 | 5.7    |
| 2     | 10414.421 | 138.036 | 8.2    |
| 3     | 9775.403  | 129.567 | 18.2   |
| 4     | 9735.321  | 129.035 | 7.9    |
| 5     | 8552.335  | 113.356 | 14.0   |
| 6     | 8448.122  | 111.974 | 18.3   |
| 7     | 6177.201  | 81.875  | 17.7   |
| 8     | 5857.691  | 77.640  | 4.8    |
| 9     | 5825.626  | 77.215  | 4.6    |
| 10    | 5793.560  | 76.790  | 4.5    |
| 11    | 4174.255  | 55.327  | 16.3   |
| 12    | 3376.054  | 44.747  | 17.4   |
| 13    | 3354.296  | 44.459  | 17.8   |
| 14    | 3298.181  | 43.715  | 10.8   |
| 15    | 3030.205  | 40.163  | 17.4   |
| 16    | 2901.944  | 38.463  | 18.5   |
| 17    | 2771.391  | 36.733  | 15.1   |
| 18    | 2613.355  | 34.638  | 18.8   |
| 19    | 2483.947  | 32.923  | 15.9   |
| 20    | 2299.571  | 30.479  | 17.4   |
| 21    | 1927.383  | 25.546  | 18.6   |
| 22    | 846.319   | 11.217  | 15.7   |

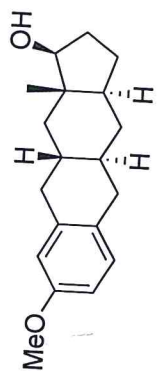

37

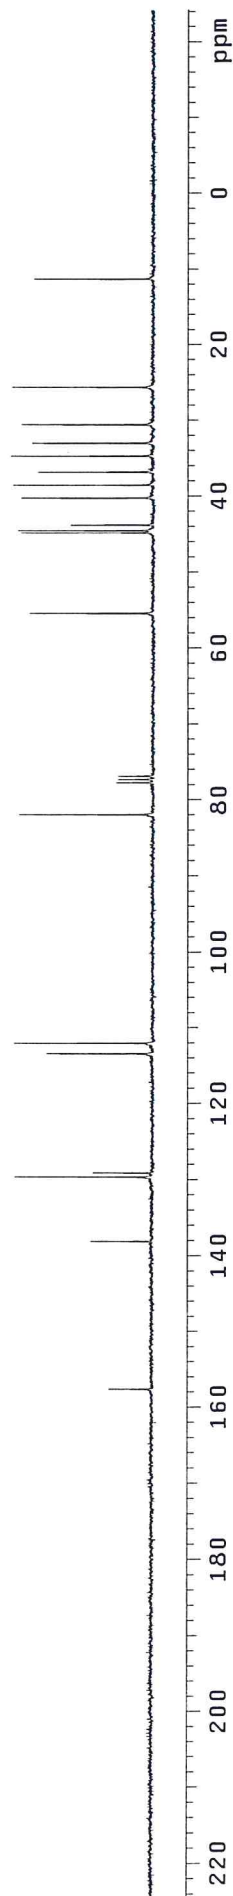

| INDEX | FREQUENCY | PPM   | HEIGHT | INDEX | FREQUENCY | PPM   | HEIGHT |
|-------|-----------|-------|--------|-------|-----------|-------|--------|
| 1     | 1504.500  | 5.014 | 4.7    | 40    | 361.737   | 1.206 | 2.3    |
| 2     | 1503.126  | 5.010 | 4.3    | 41    | 359.815   | 1.199 | 2.5    |
| 3     | 1415.771  | 4.718 | 4.4    | 42    | 354.595   | 1.182 | 2.3    |
| 4     | 1414.123  | 4.713 | 3.9    | 43    | 347.453   | 1.158 | 1.4    |
| 5     | 1182.548  | 3.941 | 1.3    | 44    | 325.477   | 1.085 | 14.2   |
| 6     | 1177.604  | 3.925 | 1.3    | 45    | 321.082   | 1.070 | 100.0  |
| 7     | 1171.835  | 3.905 | 1.2    | 46    | 316.686   | 1.055 | 6.1    |
| 8     | 1024.320  | 3.414 | 2.1    | 47    | 312.291   | 1.041 | 1.9    |
| 9     | 1016.903  | 3.389 | 2.9    | 48    | 187.301   | 0.624 | 1.6    |
| 10    | 1008.112  | 3.360 | 2.0    | 49    | 182.357   | 0.608 | 2.4    |
| 11    | 850.708   | 2.835 | 2.0    | 50    | 176.588   | 0.589 | 26.8   |
| 12    | 676.546   | 2.255 | 3.9    |       |           |       |        |
| 13    | 663.635   | 2.212 | 4.6    |       |           |       |        |
| 14    | 589.740   | 1.965 | 3.8    |       |           |       |        |
| 15    | 567.215   | 1.890 | 2.4    |       |           |       |        |
| 16    | 564.468   | 1.881 | 2.5    |       |           |       |        |
| 17    | 560.622   | 1.868 | 2.4    |       |           |       |        |
| 18    | 558.699   | 1.862 | 2.6    |       |           |       |        |
| 19    | 554.853   | 1.849 | 2.7    |       |           |       |        |
| 20    | 549.909   | 1.833 | 2.0    |       |           |       |        |
| 21    | 547.162   | 1.824 | 1.6    |       |           |       |        |
| 22    | 517.768   | 1.726 | 2.6    |       |           |       |        |
| 23    | 504.857   | 1.683 | 2.2    |       |           |       |        |
| 24    | 445.247   | 1.484 | 1.7    |       |           |       |        |
| 25    | 442.500   | 1.475 | 2.4    |       |           |       |        |
| 26    | 433.435   | 1.445 | 4.8    |       |           |       |        |
| 27    | 424.919   | 1.416 | 3.0    |       |           |       |        |
| 28    | 422.172   | 1.407 | 2.6    |       |           |       |        |
| 29    | 420.249   | 1.401 | 2.0    |       |           |       |        |
| 30    | 418.326   | 1.394 | 1.9    |       |           |       |        |
| 31    | 415.579   | 1.385 | 1.4    |       |           |       |        |
| 32    | 412.557   | 1.375 | 1.2    |       |           |       |        |
| 33    | 394.702   | 1.315 | 1.2    |       |           |       |        |
| 34    | 385.911   | 1.286 | 1.8    |       |           |       |        |
| 35    | 382.890   | 1.276 | 2.5    |       |           |       |        |
| 36    | 380.143   | 1.267 | 2.0    |       |           |       |        |
| 37    | 374.374   | 1.248 | 2.0    |       |           |       |        |
| 38    | 371.352   | 1.238 | 3.0    |       |           |       |        |
| 39    | 368.056   | 1.227 | 1.6    |       |           |       |        |

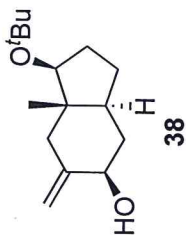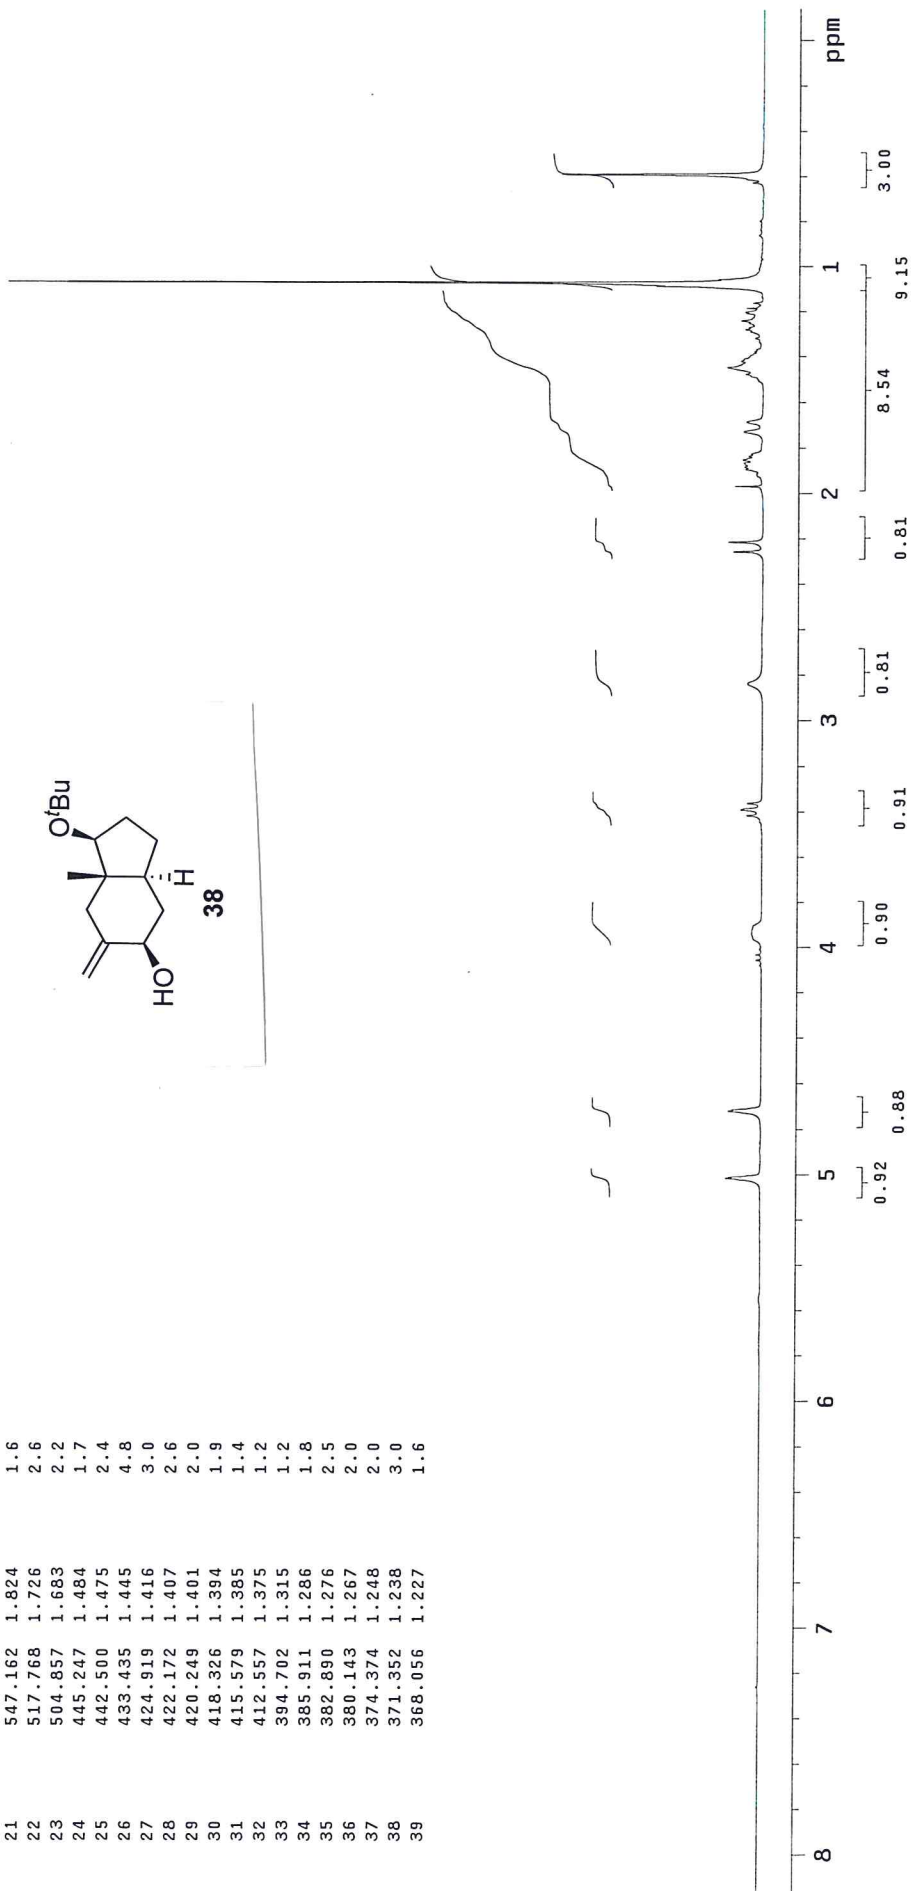

| INDEX | FREQUENCY | PPM     | HEIGHT |
|-------|-----------|---------|--------|
| 1     | 11213.594 | 148.629 | 9.9    |
| 2     | 8091.793  | 107.251 | 11.6   |
| 3     | 5968.602  | 79.110  | 15.3   |
| 4     | 5809.420  | 77.000  | 2.6    |
| 5     | 5777.354  | 76.575  | 2.8    |
| 6     | 5470.442  | 72.507  | 15.3   |
| 7     | 5440.667  | 72.112  | 8.3    |
| 8     | 3394.204  | 44.988  | 13.9   |
| 9     | 3311.750  | 43.895  | 11.5   |
| 10    | 3251.055  | 43.091  | 15.1   |
| 11    | 2678.457  | 35.501  | 12.9   |
| 12    | 2384.142  | 31.600  | 15.1   |
| 13    | 2157.394  | 28.595  | 3.7    |
| 14    | 2149.377  | 28.489  | 50.0   |
| 15    | 1871.095  | 24.800  | 15.1   |
| 16    | 810.644   | 10.745  | 13.9   |

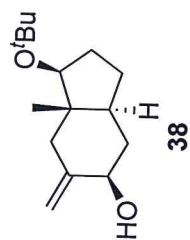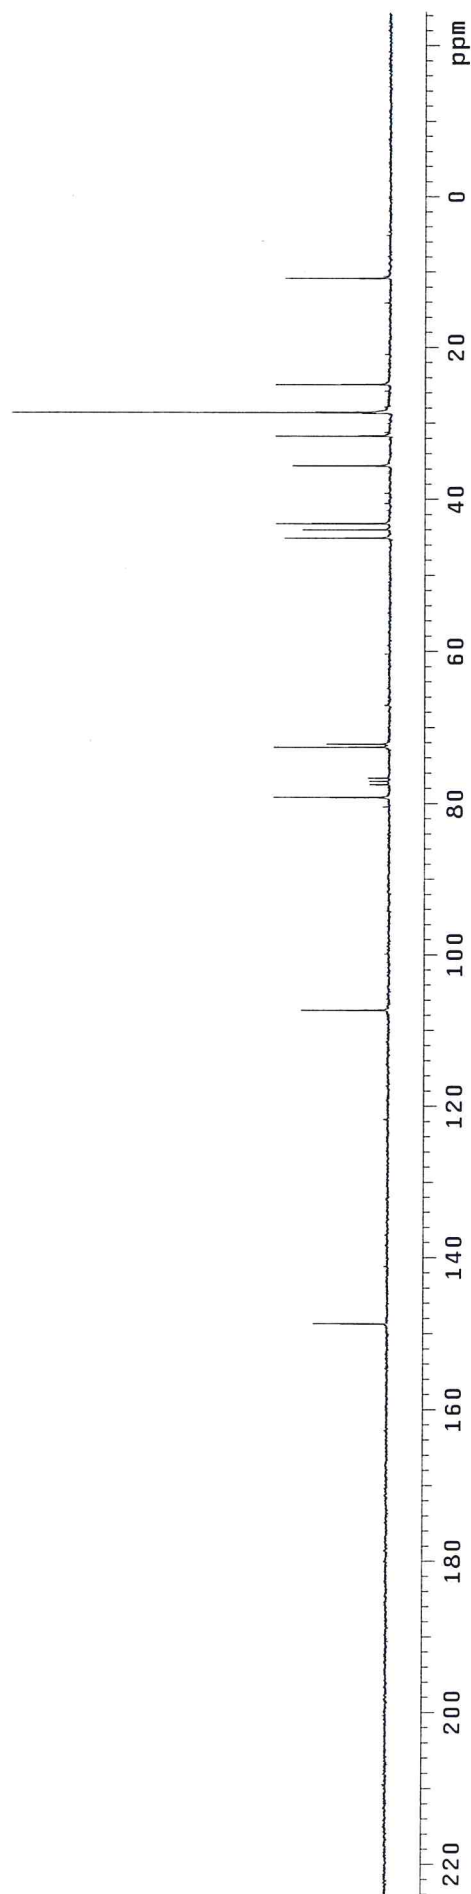

mq2046

Pulse Sequence: s2pu1

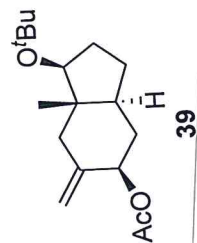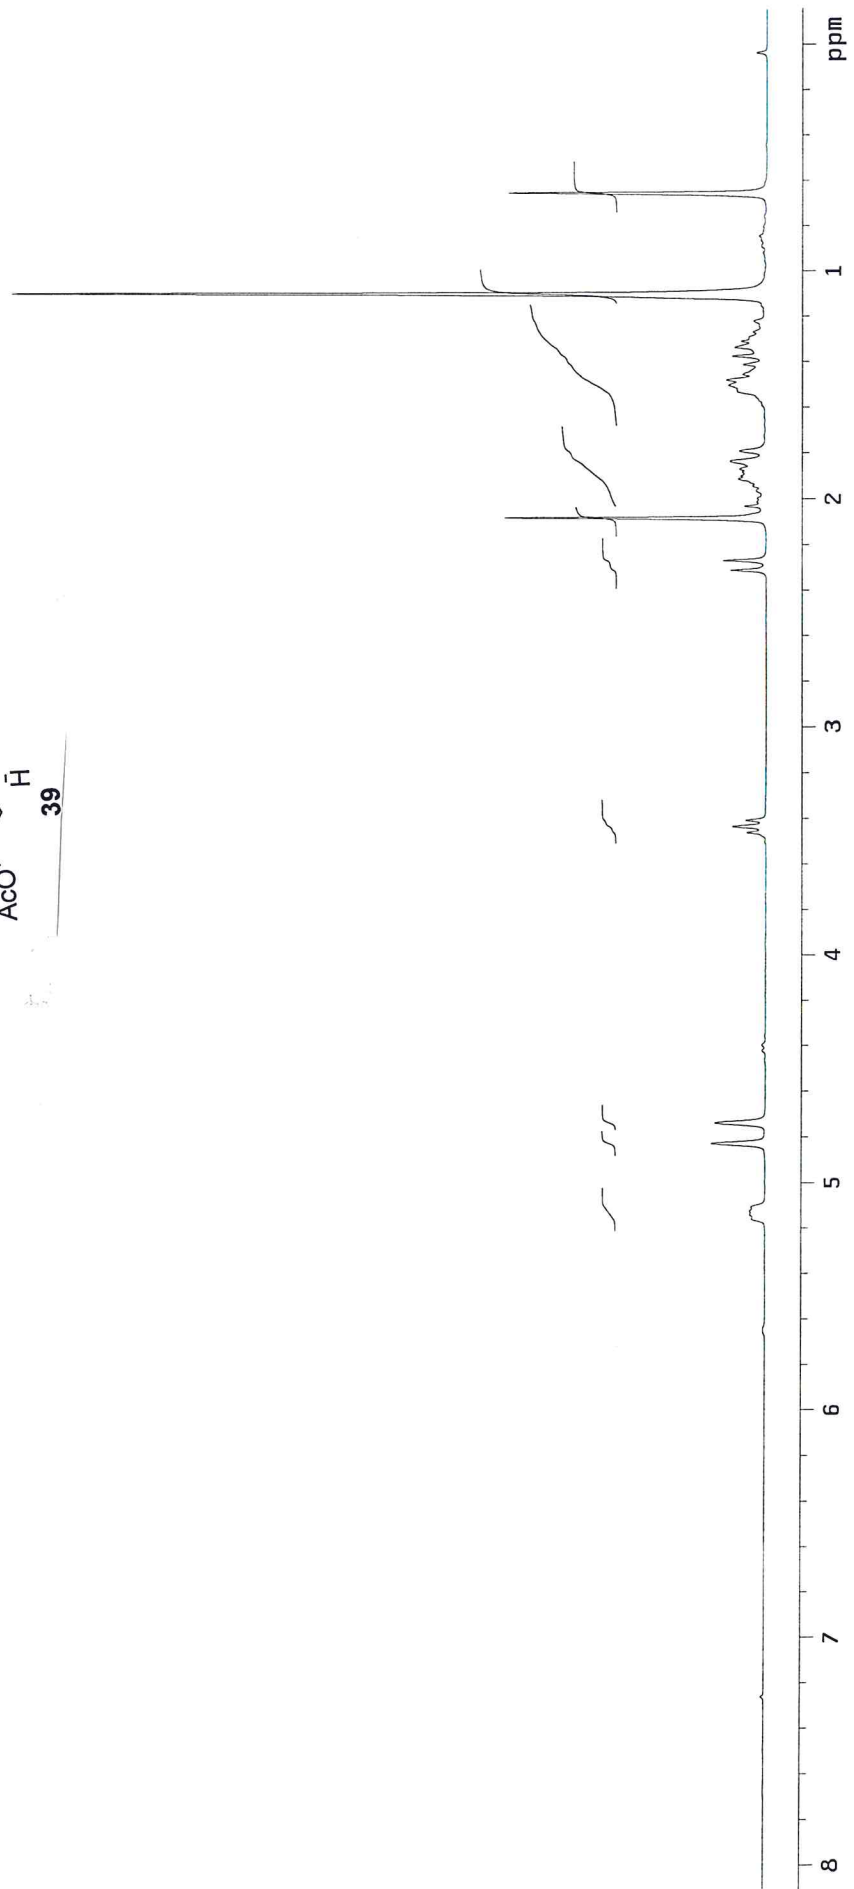

| INDEX | FREQUENCY | PPM     | HEIGHT |
|-------|-----------|---------|--------|
| 1     | 12827.173 | 170.016 | 4.2    |
| 2     | 10837.970 | 143.650 | 8.0    |
| 3     | 8142.181  | 107.919 | 13.1   |
| 4     | 5960.585  | 79.004  | 13.4   |
| 5     | 5841.485  | 77.425  | 5.4    |
| 6     | 5809.419  | 77.000  | 5.8    |
| 7     | 5777.354  | 76.575  | 5.9    |
| 8     | 5575.800  | 73.904  | 11.2   |
| 9     | 5449.828  | 72.234  | 8.3    |
| 10    | 3406.801  | 45.155  | 12.5   |
| 11    | 3302.588  | 43.774  | 6.9    |
| 12    | 3228.150  | 42.787  | 15.9   |
| 13    | 2417.352  | 32.040  | 15.3   |
| 14    | 2387.577  | 31.646  | 15.4   |
| 15    | 2161.974  | 28.656  | 4.2    |
| 16    | 2153.958  | 28.549  | 45.0   |
| 17    | 1871.094  | 24.800  | 15.7   |
| 18    | 1583.651  | 20.990  | 11.2   |
| 19    | 811.789   | 10.760  | 16.2   |

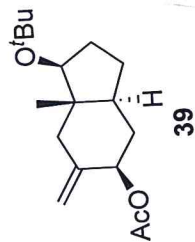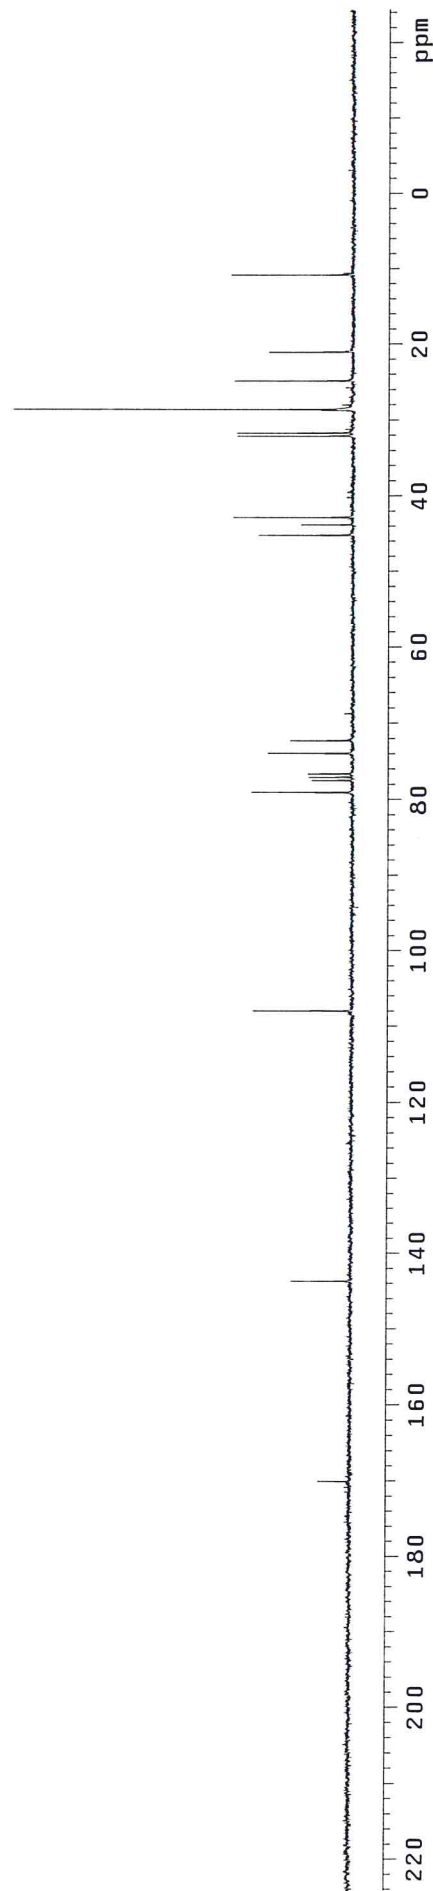

| INDEX | FREQUENCY | PPM   | HEIGHT | INDEX | FREQUENCY | PPM   | HEIGHT |
|-------|-----------|-------|--------|-------|-----------|-------|--------|
| 1     | 1525.102  | 5.083 | 2.0    | 40    | 462.279   | 1.541 | 1.4    |
| 2     | 1517.960  | 5.059 | 2.2    | 41    | 461.180   | 1.537 | 1.4    |
| 3     | 1513.565  | 5.044 | 2.2    | 42    | 454.862   | 1.516 | 1.0    |
| 4     | 1506.423  | 5.021 | 2.0    | 43    | 451.290   | 1.504 | 1.4    |
| 5     | 1076.238  | 3.587 | 2.2    | 44    | 449.642   | 1.499 | 1.1    |
| 6     | 1068.547  | 3.561 | 3.2    | 45    | 447.719   | 1.492 | 1.2    |
| 7     | 1060.031  | 3.533 | 2.0    | 46    | 443.599   | 1.478 | 1.2    |
| 8     | 716.653   | 2.388 | 4.3    | 47    | 441.951   | 1.473 | 1.0    |
| 9     | 703.467   | 2.345 | 5.9    | 48    | 440.028   | 1.467 | 1.2    |
| 10    | 640.286   | 2.134 | 3.8    | 49    | 437.830   | 1.459 | 1.1    |
| 11    | 630.946   | 2.103 | 1.8    | 50    | 434.534   | 1.448 | 1.0    |
| 12    | 627.375   | 2.091 | 4.3    | 51    | 430.138   | 1.434 | 1.0    |
| 13    | 623.804   | 2.079 | 2.3    | 52    | 427.391   | 1.424 | 1.0    |
| 14    | 618.859   | 2.063 | 4.3    | 53    | 421.073   | 1.403 | 1.1    |
| 15    | 615.288   | 2.051 | 42.7   | 54    | 415.304   | 1.384 | 0.9    |
| 16    | 611.991   | 2.040 | 3.4    | 55    | 409.536   | 1.365 | 1.9    |
| 17    | 608.420   | 2.028 | 2.9    | 56    | 403.492   | 1.345 | 1.5    |
| 18    | 604.025   | 2.013 | 1.6    | 57    | 397.723   | 1.326 | 1.4    |
| 19    | 599.904   | 1.999 | 1.4    | 58    | 391.955   | 1.306 | 1.3    |
| 20    | 598.531   | 1.995 | 1.5    | 59    | 346.629   | 1.155 | 1.1    |
| 21    | 594.136   | 1.980 | 1.9    | 60    | 308.445   | 1.028 | 100.0  |
| 22    | 591.114   | 1.970 | 1.7    | 61    | 187.851   | 0.626 | 25.0   |
| 23    | 588.916   | 1.963 | 1.5    |       |           |       |        |
| 24    | 584.796   | 1.949 | 2.2    |       |           |       |        |
| 25    | 580.950   | 1.936 | 3.2    |       |           |       |        |
| 26    | 576.005   | 1.920 | 1.9    |       |           |       |        |
| 27    | 572.709   | 1.909 | 1.3    |       |           |       |        |
| 28    | 570.786   | 1.902 | 1.3    |       |           |       |        |
| 29    | 567.215   | 1.890 | 0.9    |       |           |       |        |
| 30    | 563.369   | 1.878 | 1.0    |       |           |       |        |
| 31    | 560.073   | 1.867 | 0.9    |       |           |       |        |
| 32    | 515.846   | 1.719 | 1.8    |       |           |       |        |
| 33    | 503.759   | 1.679 | 3.5    |       |           |       |        |
| 34    | 491.397   | 1.638 | 3.2    |       |           |       |        |
| 35    | 485.628   | 1.619 | 0.9    |       |           |       |        |
| 36    | 479.310   | 1.597 | 2.0    |       |           |       |        |
| 37    | 472.992   | 1.576 | 1.3    |       |           |       |        |
| 38    | 470.520   | 1.568 | 1.3    |       |           |       |        |
| 39    | 468.597   | 1.562 | 1.1    |       |           |       |        |

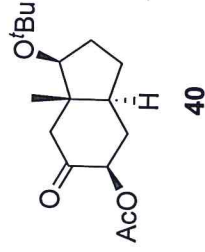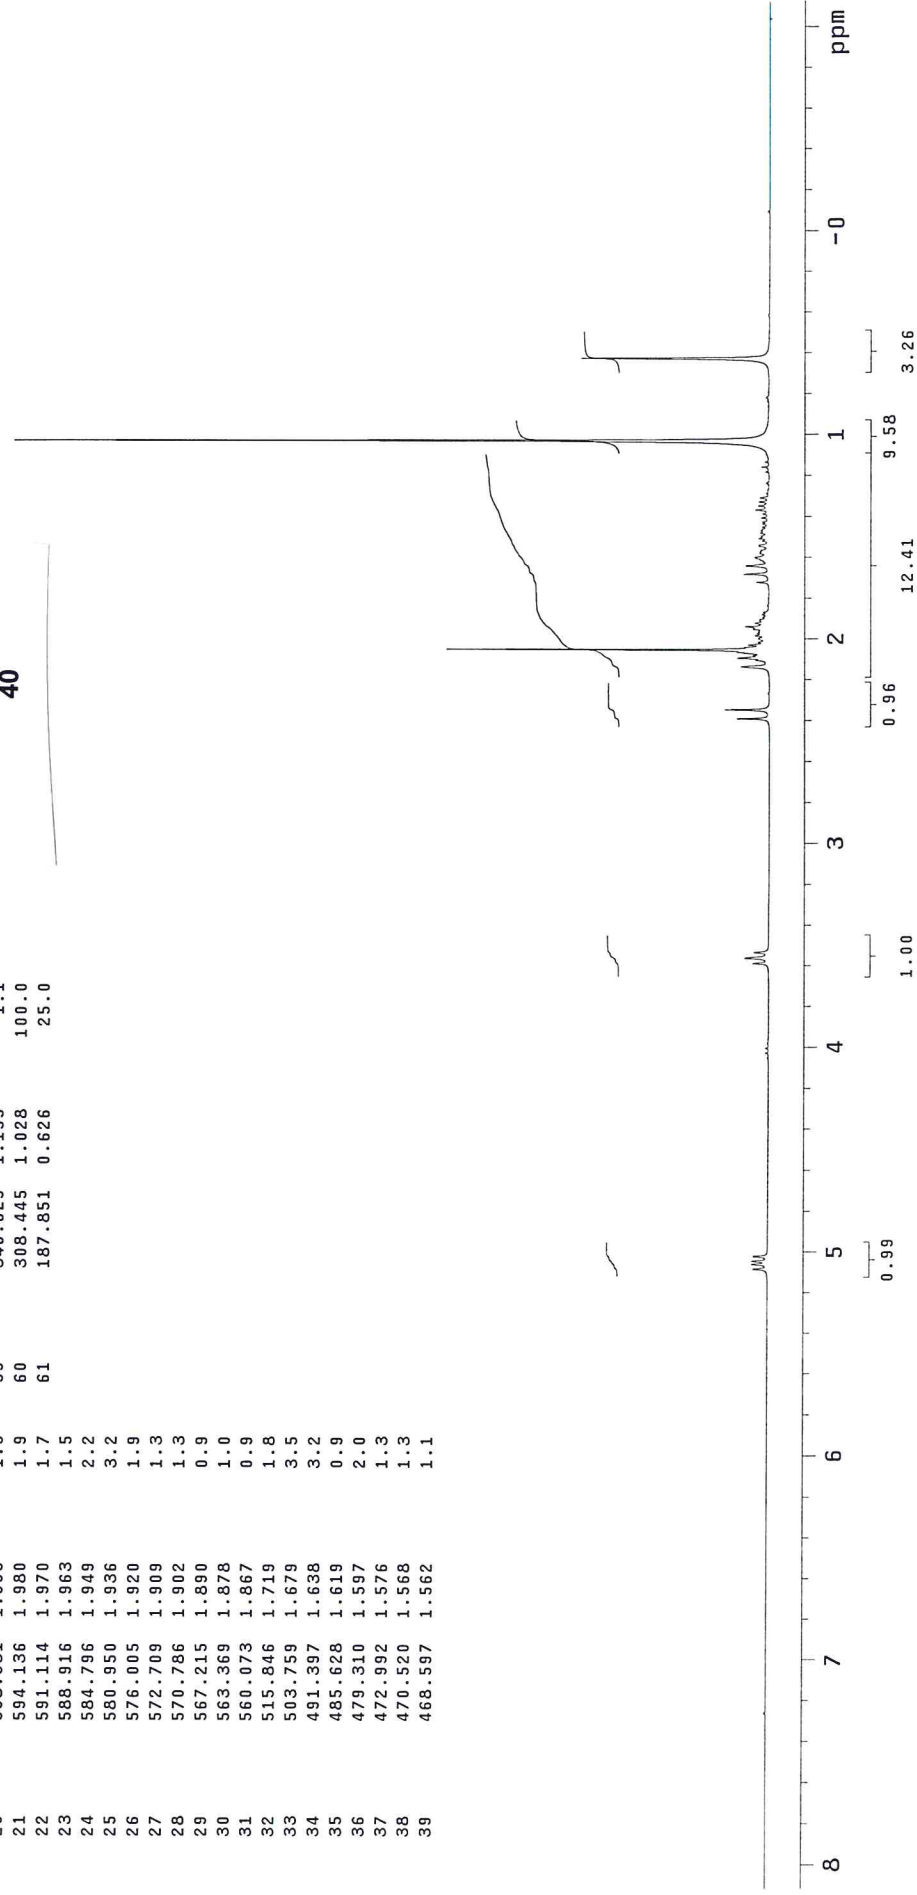



| INDEX | FREQUENCY | PPM     | HEIGHT |
|-------|-----------|---------|--------|
| 1     | 15394.874 | 204.049 | 3.6    |
| 2     | 12818.185 | 169.897 | 3.1    |
| 3     | 5937.855  | 78.702  | 8.8    |
| 4     | 5857.691  | 77.640  | 3.0    |
| 5     | 5825.626  | 77.215  | 3.4    |
| 6     | 5793.561  | 76.790  | 3.1    |
| 7     | 5717.978  | 75.788  | 9.4    |
| 8     | 5475.196  | 72.570  | 7.4    |
| 9     | 3869.633  | 51.289  | 11.0   |
| 10    | 3544.398  | 46.979  | 7.6    |
| 11    | 3149.306  | 41.742  | 10.7   |
| 12    | 2428.978  | 32.195  | 9.4    |
| 13    | 2325.911  | 30.828  | 10.6   |
| 14    | 2152.986  | 28.536  | 36.7   |
| 15    | 1849.510  | 24.514  | 8.8    |
| 16    | 1559.775  | 20.674  | 8.3    |
| 17    | 877.239   | 11.627  | 12.2   |

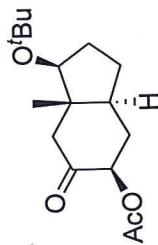

40

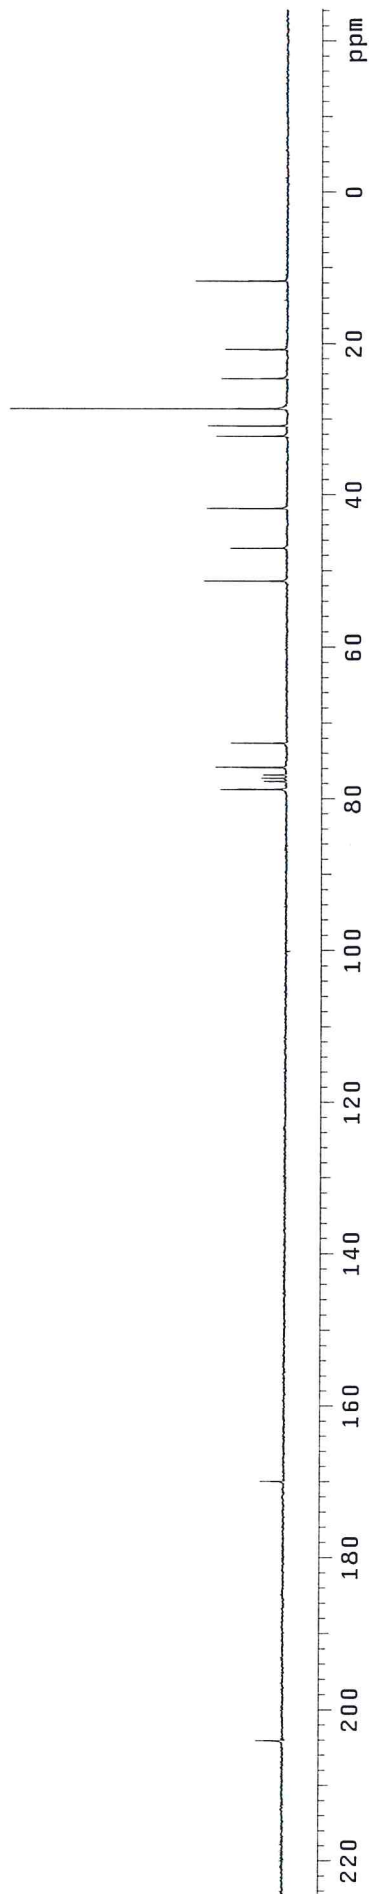

| INDEX | FREQUENCY | PPM   | HEIGHT | INDEX | FREQUENCY | PPM   | HEIGHT |
|-------|-----------|-------|--------|-------|-----------|-------|--------|
| 1     | 1047.530  | 3.491 | 3.1    | 40    | 423.131   | 1.410 | 3.0    |
| 2     | 1039.563  | 3.465 | 4.5    | 41    | 421.208   | 1.404 | 2.4    |
| 3     | 1031.047  | 3.436 | 2.9    | 42    | 416.813   | 1.389 | 2.0    |
| 4     | 675.857   | 2.253 | 3.0    | 43    | 415.439   | 1.385 | 1.8    |
| 5     | 674.209   | 2.247 | 3.9    | 44    | 413.242   | 1.377 | 2.0    |
| 6     | 666.243   | 2.220 | 2.2    | 45    | 411.319   | 1.371 | 1.7    |
| 7     | 662.397   | 2.208 | 4.8    | 46    | 373.135   | 1.244 | 2.3    |
| 8     | 660.474   | 2.201 | 4.8    | 47    | 367.092   | 1.223 | 2.0    |
| 9     | 657.727   | 2.192 | 2.7    | 48    | 361.598   | 1.205 | 1.8    |
| 10    | 656.079   | 2.187 | 3.0    | 49    | 355.554   | 1.185 | 1.8    |
| 11    | 654.156   | 2.180 | 2.1    | 50    | 289.076   | 0.963 | 125.0  |
| 12    | 652.507   | 2.175 | 2.3    | 51    | 161.065   | 0.537 | 30.2   |
| 13    | 650.859   | 2.169 | 2.7    |       |           |       |        |
| 14    | 631.081   | 2.103 | 1.7    |       |           |       |        |
| 15    | 625.861   | 2.086 | 2.1    |       |           |       |        |
| 16    | 618.719   | 2.062 | 2.1    |       |           |       |        |
| 17    | 583.557   | 1.945 | 4.7    |       |           |       |        |
| 18    | 573.393   | 1.911 | 2.6    |       |           |       |        |
| 19    | 569.822   | 1.899 | 4.5    |       |           |       |        |
| 20    | 563.229   | 1.877 | 2.6    |       |           |       |        |
| 21    | 560.482   | 1.868 | 2.0    |       |           |       |        |
| 22    | 554.439   | 1.848 | 2.0    |       |           |       |        |
| 23    | 522.848   | 1.743 | 2.3    |       |           |       |        |
| 24    | 521.200   | 1.737 | 1.9    |       |           |       |        |
| 25    | 519.552   | 1.732 | 1.9    |       |           |       |        |
| 26    | 515.706   | 1.719 | 3.2    |       |           |       |        |
| 27    | 513.508   | 1.711 | 3.5    |       |           |       |        |
| 28    | 511.310   | 1.704 | 3.4    |       |           |       |        |
| 29    | 506.091   | 1.687 | 4.0    |       |           |       |        |
| 30    | 502.245   | 1.674 | 2.7    |       |           |       |        |
| 31    | 458.293   | 1.527 | 2.2    |       |           |       |        |
| 32    | 454.996   | 1.516 | 2.4    |       |           |       |        |
| 33    | 451.151   | 1.504 | 2.1    |       |           |       |        |
| 34    | 448.129   | 1.494 | 2.4    |       |           |       |        |
| 35    | 445.657   | 1.485 | 2.0    |       |           |       |        |
| 36    | 440.162   | 1.467 | 2.9    |       |           |       |        |
| 37    | 436.042   | 1.453 | 3.1    |       |           |       |        |
| 38    | 428.350   | 1.428 | 3.1    |       |           |       |        |
| 39    | 424.779   | 1.416 | 2.8    |       |           |       |        |

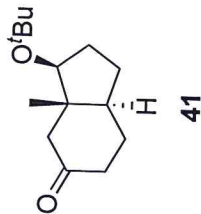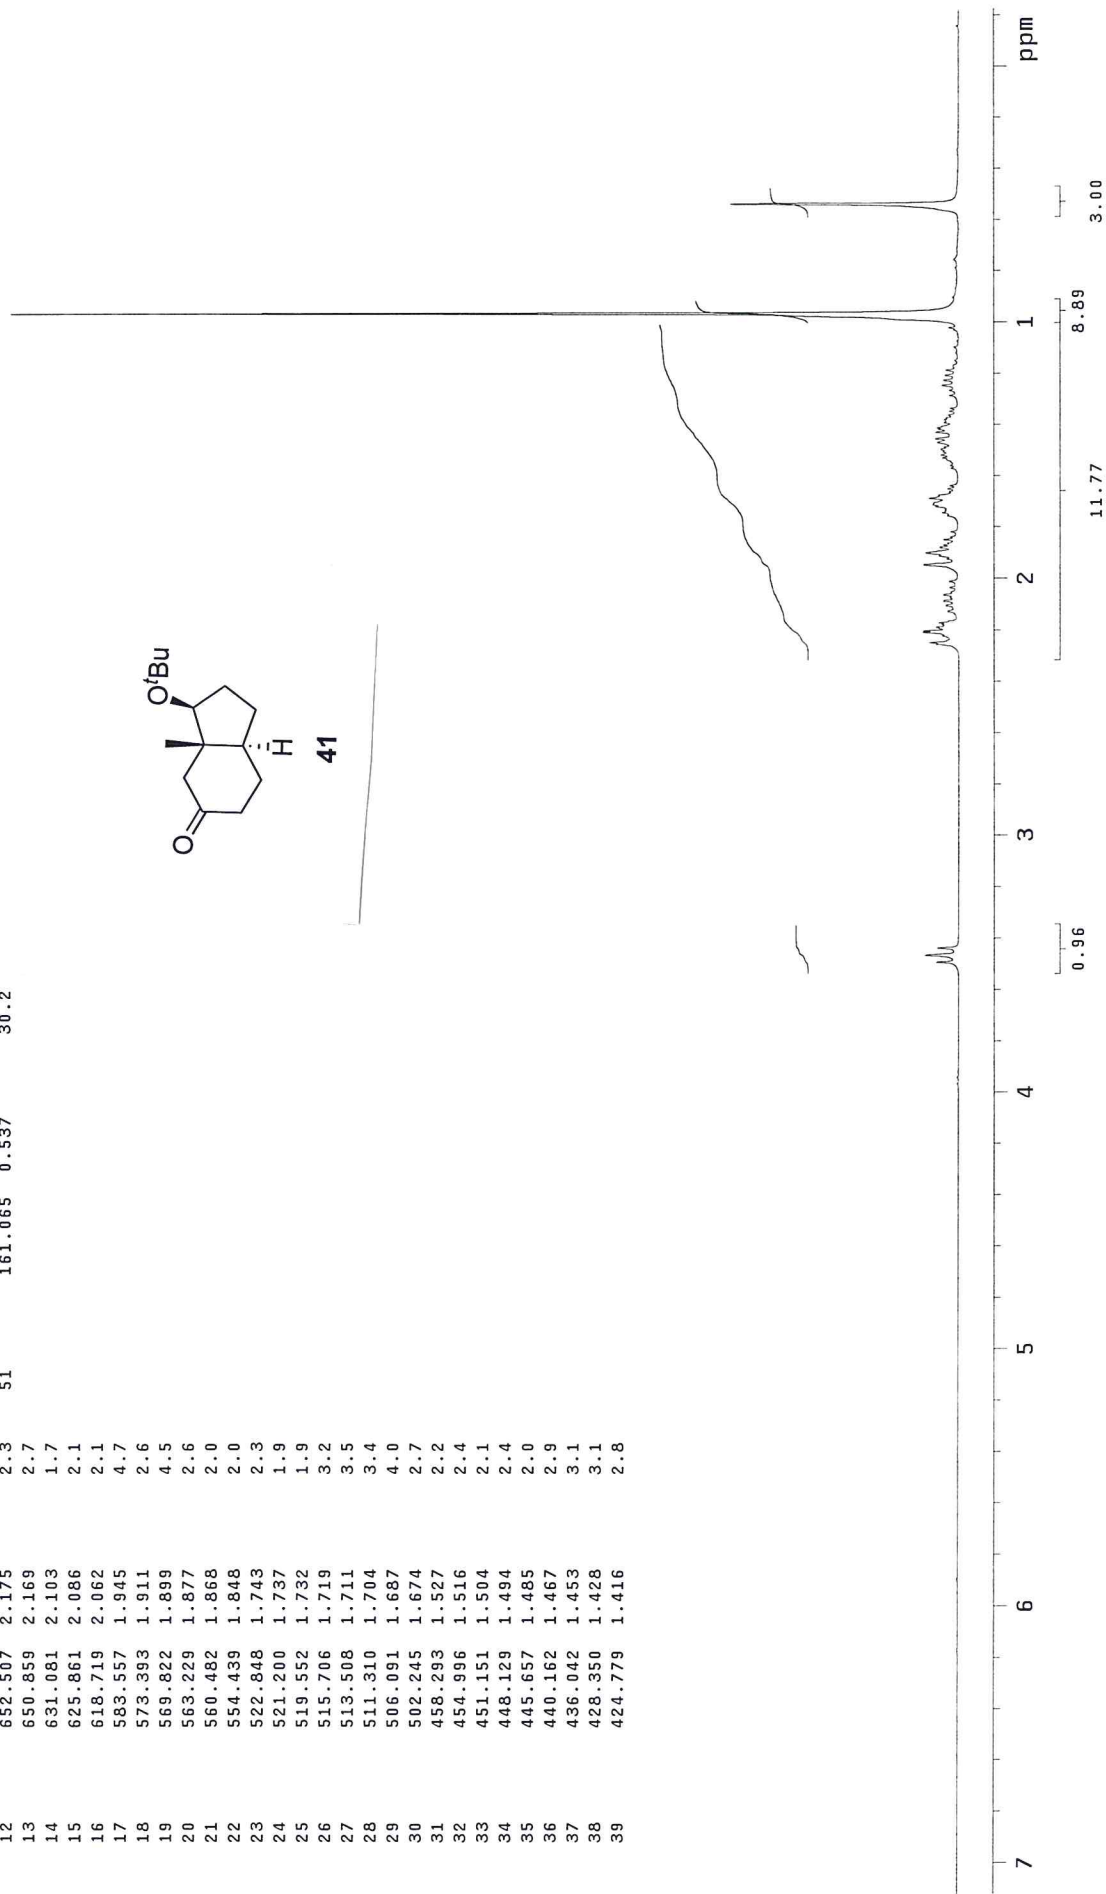

| INDEX | FREQUENCY | PPM     | HEIGHT |
|-------|-----------|---------|--------|
| 1     | 15994.956 | 212.003 | 5.2    |
| 2     | 5977.937  | 79.234  | 16.7   |
| 3     | 5857.691  | 77.640  | 4.9    |
| 4     | 5825.626  | 77.215  | 4.9    |
| 5     | 5793.560  | 76.790  | 5.0    |
| 6     | 5464.890  | 72.433  | 8.7    |
| 7     | 4055.155  | 53.748  | 22.3   |
| 8     | 3503.171  | 46.432  | 8.4    |
| 9     | 3261.535  | 43.229  | 17.5   |
| 10    | 3061.126  | 40.573  | 21.9   |
| 11    | 2424.397  | 32.134  | 20.2   |
| 12    | 2159.857  | 28.627  | 73.0   |
| 13    | 1891.882  | 25.076  | 23.0   |
| 14    | 1872.413  | 24.818  | 21.6   |
| 15    | 887.546   | 11.764  | 19.8   |

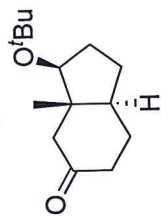

41

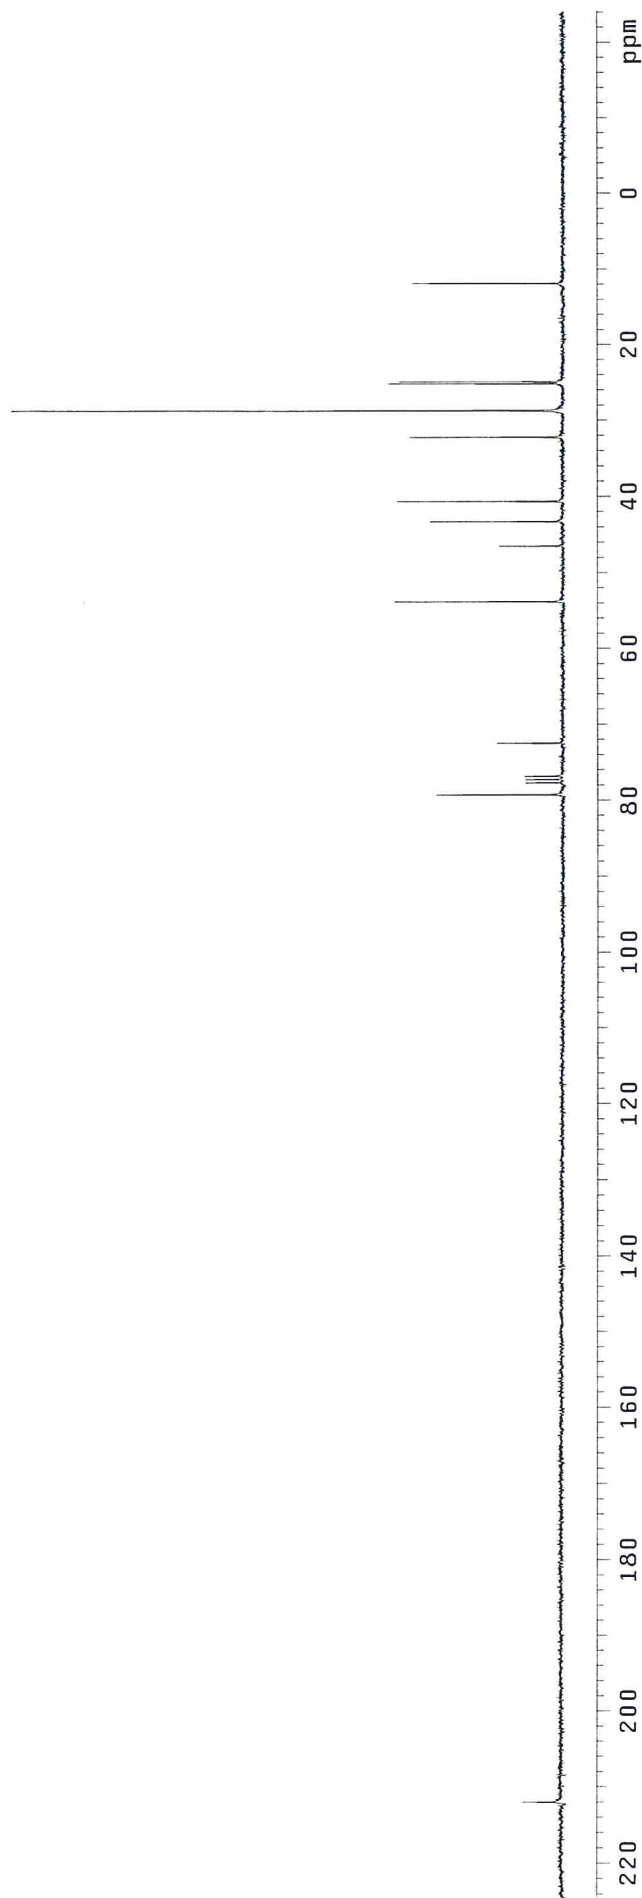

| INDEX | FREQUENCY | PPM    | HEIGHT |
|-------|-----------|--------|--------|
| 1     | 3652.808  | 12.174 | 9.6    |
| 2     | 1089.010  | 3.629  | 42.3   |
| 3     | 309.129   | 1.030  | 107.1  |
| 4     | 186.887   | 0.623  | 27.4   |

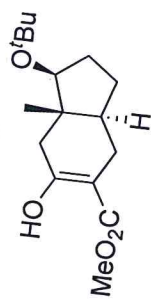

42

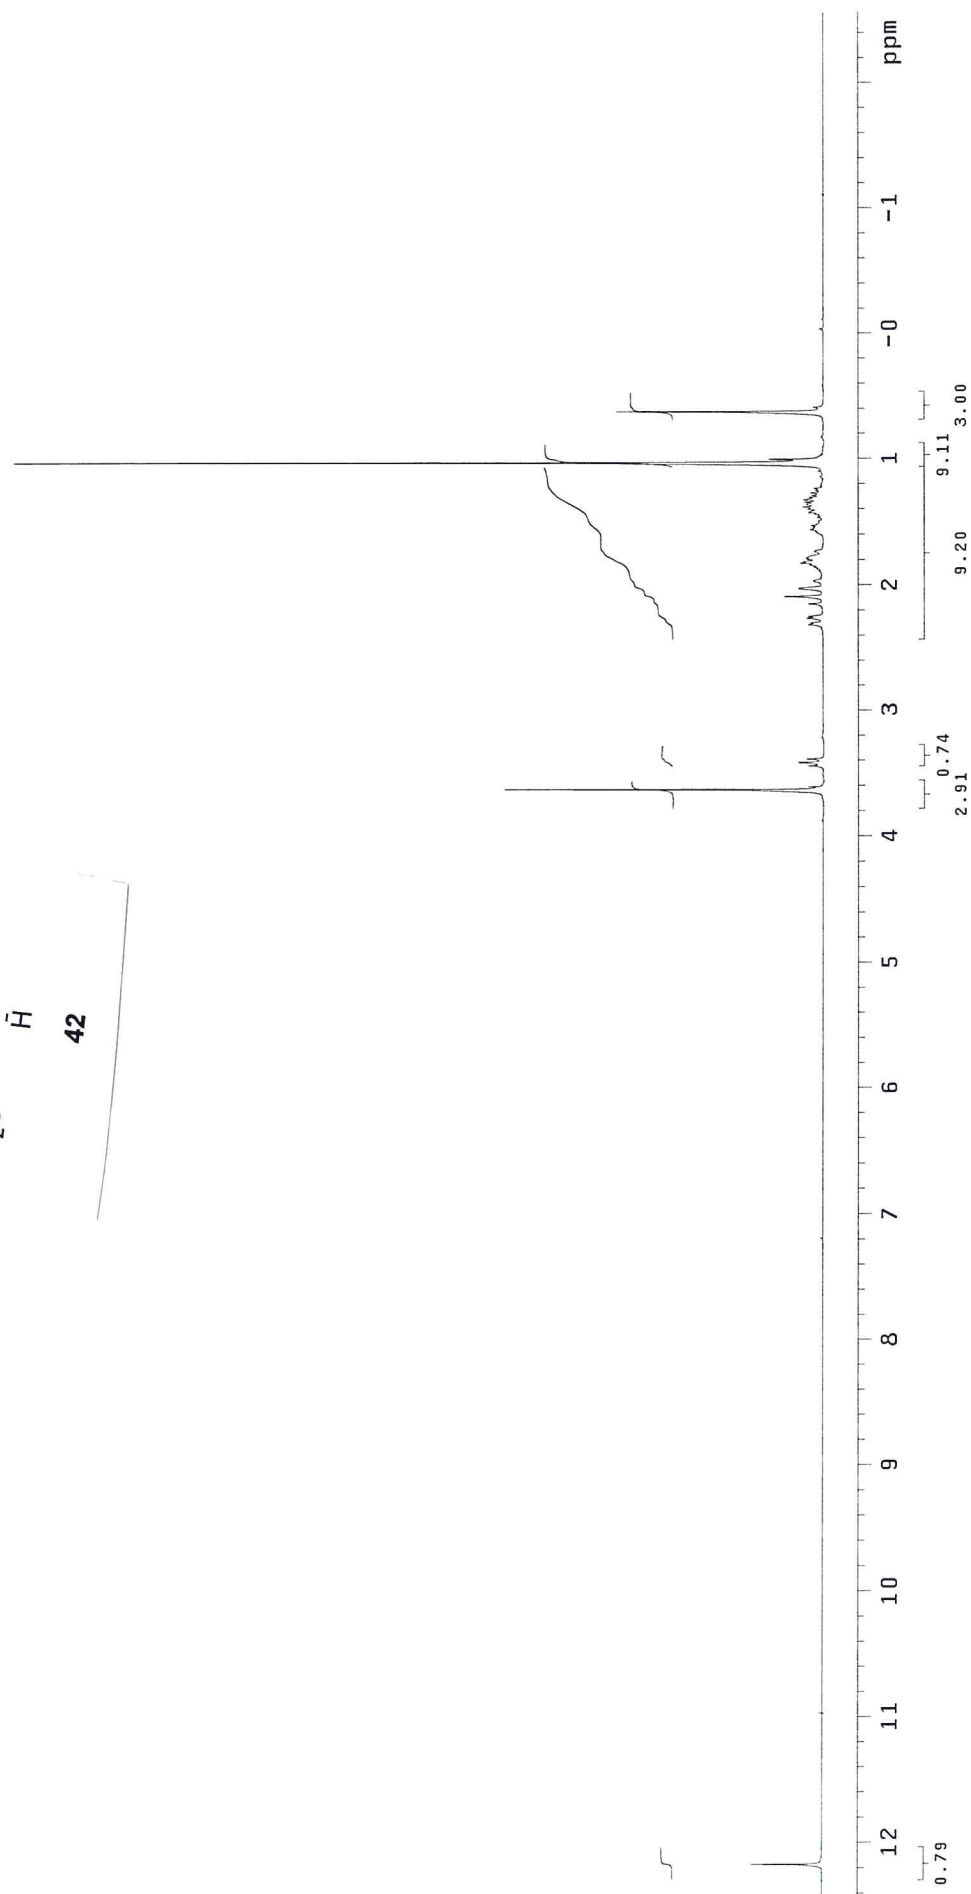

| INDEX | FREQUENCY | PPM     | HEIGHT |
|-------|-----------|---------|--------|
| 1     | 13065.547 | 173.175 | 4.6    |
| 2     | 13044.933 | 172.902 | 9.9    |
| 3     | 7301.782  | 96.780  | 5.7    |
| 4     | 6054.664  | 80.251  | 13.8   |
| 5     | 5858.836  | 77.655  | 3.5    |
| 6     | 5826.771  | 77.230  | 3.8    |
| 7     | 5794.705  | 76.805  | 3.4    |
| 8     | 5467.180  | 72.464  | 6.9    |
| 9     | 3877.649  | 51.396  | 8.6    |
| 10    | 3226.033  | 42.759  | 13.3   |
| 11    | 3161.902  | 41.909  | 8.5    |
| 12    | 3055.399  | 40.497  | 12.9   |
| 13    | 2382.025  | 31.572  | 14.8   |
| 14    | 2172.454  | 28.794  | 48.0   |
| 15    | 2164.438  | 28.688  | 3.2    |
| 16    | 1936.544  | 25.668  | 15.6   |
| 17    | 1872.413  | 24.818  | 13.6   |
| 18    | 841.738   | 11.157  | 14.6   |

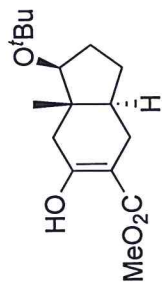

42

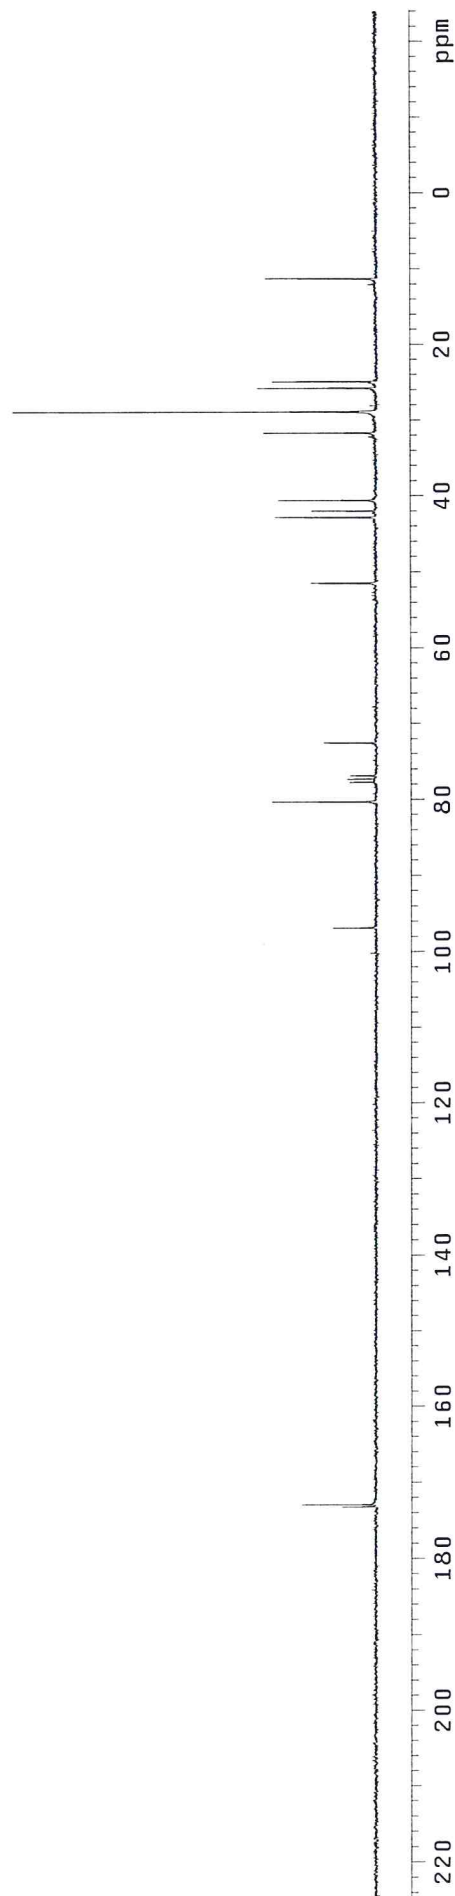

| INDEX | FREQUENCY | PPM   | HEIGHT | INDEX | FREQUENCY | PPM   | HEIGHT | INDEX | FREQUENCY | PPM    | HEIGHT | INDEX | FREQUENCY | PPM | HEIGHT |
|-------|-----------|-------|--------|-------|-----------|-------|--------|-------|-----------|--------|--------|-------|-----------|-----|--------|
| 1     | 2134.802  | 7.115 | 1.4    | 40    | 897.817   | 2.992 | 3.1    | 79    | 302.537   | 1.008  | 13.0   |       |           |     |        |
| 2     | 2127.110  | 7.089 | 3.2    | 41    | 884.082   | 2.946 | 2.3    | 80    | 212.709   | 0.709  | 15.9   |       |           |     |        |
| 3     | 2122.166  | 7.073 | 2.0    | 42    | 716.238   | 2.387 | 1.8    | 81    | 199.248   | 0.664  | 3.0    |       |           |     |        |
| 4     | 2120.243  | 7.066 | 2.1    | 43    | 701.954   | 2.339 | 3.9    | 82    | 197.326   | 0.658  | 3.0    |       |           |     |        |
| 5     | 2118.869  | 7.062 | 2.0    | 44    | 680.252   | 2.267 | 3.9    | 83    | 193.480   | 0.645  | 3.9    |       |           |     |        |
| 6     | 2114.749  | 7.048 | 1.1    | 45    | 665.968   | 2.220 | 2.1    | 84    | 192.106   | 0.640  | 3.4    |       |           |     |        |
| 7     | 2021.624  | 6.738 | 7.5    | 46    | 637.674   | 2.125 | 1.6    | 85    | 190.183   | 0.634  | 3.4    |       |           |     |        |
| 8     | 2020.251  | 6.733 | 6.8    | 47    | 624.213   | 2.080 | 2.8    | 86    | -0.460    | -0.002 | 1.2    |       |           |     |        |
| 9     | 2012.834  | 6.708 | 3.5    | 48    | 618.994   | 2.063 | 7.8    | 87    | -2.108    | -0.007 | 1.5    |       |           |     |        |
| 10    | 2010.636  | 6.701 | 3.4    | 49    | 611.302   | 2.037 | 10.6   |       |           |        |        |       |           |     |        |
| 11    | 2008.988  | 6.696 | 2.9    | 50    | 611.302   | 2.037 | 2.2    |       |           |        |        |       |           |     |        |
| 12    | 2001.571  | 6.671 | 2.6    | 51    | 587.403   | 1.958 | 1.2    |       |           |        |        |       |           |     |        |
| 13    | 1993.605  | 6.644 | 2.1    | 52    | 582.733   | 1.942 | 1.6    |       |           |        |        |       |           |     |        |
| 14    | 1986.737  | 6.621 | 1.9    | 53    | 580.810   | 1.936 | 1.6    |       |           |        |        |       |           |     |        |
| 15    | 1985.364  | 6.617 | 1.9    | 54    | 579.162   | 1.930 | 1.3    |       |           |        |        |       |           |     |        |
| 16    | 1977.397  | 6.590 | 1.7    | 55    | 573.118   | 1.910 | 1.4    |       |           |        |        |       |           |     |        |
| 17    | 1114.557  | 3.715 | 3.0    | 56    | 564.328   | 1.881 | 1.5    |       |           |        |        |       |           |     |        |
| 18    | 1112.909  | 3.709 | 4.3    | 57    | 559.933   | 1.866 | 1.5    |       |           |        |        |       |           |     |        |
| 19    | 1110.162  | 3.700 | 1.9    | 58    | 555.538   | 1.851 | 1.3    |       |           |        |        |       |           |     |        |
| 20    | 1101.921  | 3.672 | 35.1   | 59    | 548.121   | 1.827 | 1.3    |       |           |        |        |       |           |     |        |
| 21    | 1099.448  | 3.664 | 26.7   | 60    | 517.354   | 1.724 | 2.9    |       |           |        |        |       |           |     |        |
| 22    | 1090.658  | 3.635 | 2.2    | 61    | 503.619   | 1.678 | 2.3    |       |           |        |        |       |           |     |        |
| 23    | 1085.164  | 3.617 | 1.5    | 62    | 453.623   | 1.512 | 1.8    |       |           |        |        |       |           |     |        |
| 24    | 1083.516  | 3.611 | 1.5    | 63    | 446.481   | 1.488 | 2.4    |       |           |        |        |       |           |     |        |
| 25    | 1067.583  | 3.558 | 1.8    | 64    | 436.317   | 1.454 | 1.7    |       |           |        |        |       |           |     |        |
| 26    | 1064.012  | 3.546 | 2.9    | 65    | 395.661   | 1.319 | 1.2    |       |           |        |        |       |           |     |        |
| 27    | 1062.364  | 3.541 | 4.2    | 66    | 383.848   | 1.279 | 1.5    |       |           |        |        |       |           |     |        |
| 28    | 1060.166  | 3.533 | 3.2    | 67    | 378.629   | 1.262 | 1.6    |       |           |        |        |       |           |     |        |
| 29    | 1052.749  | 3.509 | 3.1    | 68    | 372.036   | 1.240 | 1.6    |       |           |        |        |       |           |     |        |
| 30    | 1051.101  | 3.503 | 3.9    | 69    | 366.817   | 1.223 | 1.4    |       |           |        |        |       |           |     |        |
| 31    | 1048.354  | 3.494 | 3.1    | 70    | 353.357   | 1.178 | 1.4    |       |           |        |        |       |           |     |        |
| 32    | 1046.431  | 3.488 | 3.6    | 71    | 348.137   | 1.160 | 1.8    |       |           |        |        |       |           |     |        |
| 33    | 1041.761  | 3.472 | 3.2    | 72    | 346.489   | 1.155 | 2.3    |       |           |        |        |       |           |     |        |
| 34    | 1040.113  | 3.466 | 5.0    | 73    | 344.566   | 1.148 | 1.7    |       |           |        |        |       |           |     |        |
| 35    | 1038.484  | 3.461 | 3.0    | 74    | 340.995   | 1.136 | 1.1    |       |           |        |        |       |           |     |        |
| 36    | 1031.047  | 3.436 | 1.6    | 75    | 339.347   | 1.131 | 1.1    |       |           |        |        |       |           |     |        |
| 37    | 1029.399  | 3.431 | 1.9    | 76    | 314.349   | 1.048 | 50.8   |       |           |        |        |       |           |     |        |
| 38    | 981.052   | 3.270 | 2.2    | 77    | 312.701   | 1.042 | 64.9   |       |           |        |        |       |           |     |        |
| 39    | 967.316   | 3.224 | 3.0    | 78    | 303.910   | 1.013 | 11.1   |       |           |        |        |       |           |     |        |

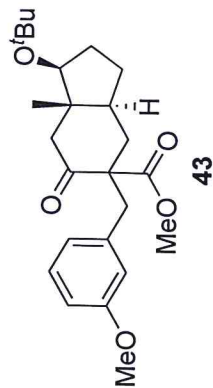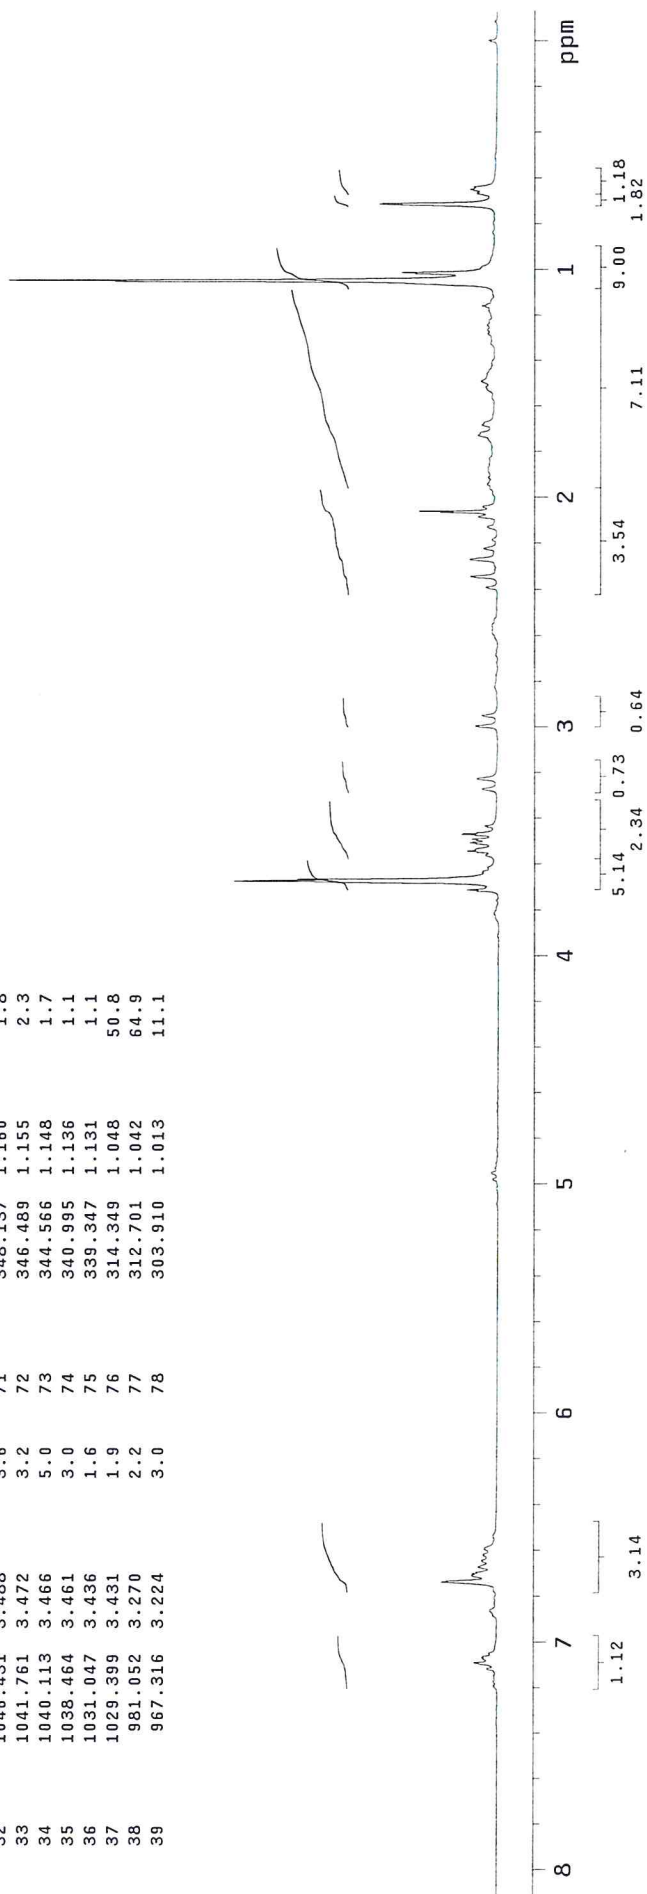

| INDEX | FREQUENCY | PPM     | HEIGHT |
|-------|-----------|---------|--------|
| 1     | 15786.530 | 209.240 | 7.5    |
| 2     | 13026.611 | 172.659 | 6.6    |
| 3     | 12039.453 | 159.575 | 9.2    |
| 4     | 10386.937 | 137.672 | 10.8   |
| 5     | 9758.225  | 129.339 | 6.6    |
| 6     | 9750.209  | 129.233 | 19.3   |
| 7     | 9271.517  | 122.888 | 17.0   |
| 8     | 9140.965  | 121.157 | 6.3    |
| 9     | 8777.938  | 116.346 | 17.5   |
| 10    | 8479.042  | 112.384 | 18.7   |
| 11    | 5982.518  | 79.294  | 17.2   |
| 12    | 5857.692  | 77.640  | 7.9    |
| 13    | 5825.626  | 77.215  | 8.3    |
| 14    | 5793.561  | 76.790  | 8.4    |
| 15    | 5477.487  | 72.600  | 10.1   |
| 16    | 4695.319  | 62.233  | 11.6   |
| 17    | 4160.513  | 55.145  | 19.9   |
| 18    | 3948.652  | 52.337  | 13.8   |
| 19    | 3890.247  | 51.563  | 17.1   |
| 20    | 3508.897  | 46.508  | 13.0   |
| 21    | 2919.122  | 38.691  | 21.7   |
| 22    | 2913.396  | 38.615  | 17.6   |
| 23    | 2403.784  | 31.861  | 17.5   |
| 24    | 2308.733  | 30.601  | 16.3   |
| 25    | 2175.890  | 28.840  | 18.5   |
| 26    | 2162.148  | 28.658  | 59.8   |
| 27    | 1889.592  | 25.045  | 16.6   |
| 28    | 911.595   | 12.083  | 18.8   |

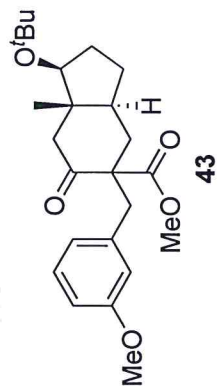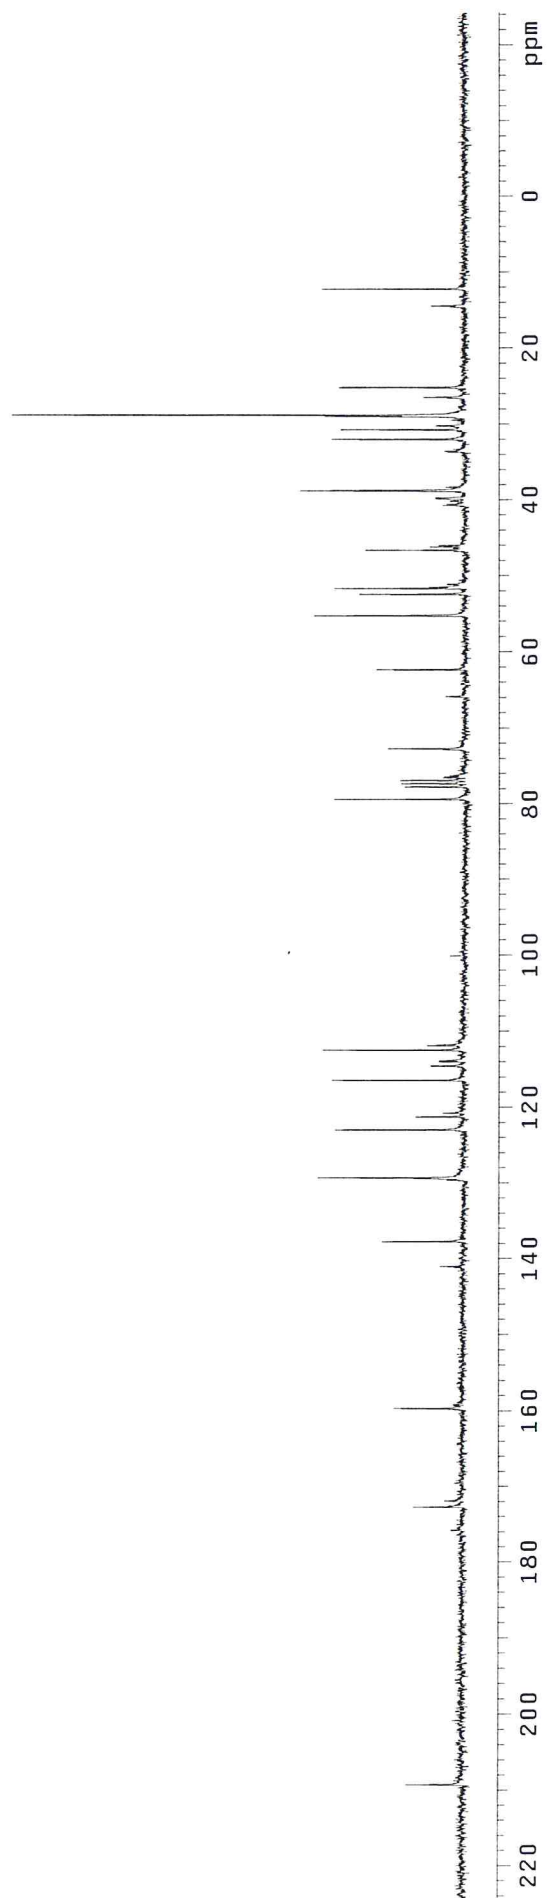



| INDEX | FREQUENCY | PPM   | HEIGHT | INDEX | FREQUENCY | PPM   | HEIGHT |
|-------|-----------|-------|--------|-------|-----------|-------|--------|
| 1     | 2133.339  | 7.110 | 1.5    | 40    | 338.159   | 1.127 | 2.0    |
| 2     | 2125.647  | 7.084 | 2.8    | 41    | 328.544   | 1.095 | 1.0    |
| 3     | 2118.231  | 7.060 | 1.8    | 42    | 308.216   | 1.027 | 50.0   |
| 4     | 1994.889  | 6.649 | 5.2    | 43    | 188.995   | 0.630 | 0.8    |
| 5     | 1986.373  | 6.620 | 7.4    | 44    | 169.766   | 0.566 | 15.6   |
| 6     | 1103.754  | 3.679 | 19.0   | 45    | 0.000     | 0.000 | 2.2    |
| 7     | 1092.492  | 3.641 | 0.8    |       |           |       |        |
| 8     | 1058.428  | 3.528 | 1.4    |       |           |       |        |
| 9     | 1050.462  | 3.501 | 2.5    |       |           |       |        |
| 10    | 1042.221  | 3.474 | 1.4    |       |           |       |        |
| 11    | 959.536   | 3.198 | 1.8    |       |           |       |        |
| 12    | 949.921   | 3.166 | 1.8    |       |           |       |        |
| 13    | 713.402   | 2.378 | 2.5    |       |           |       |        |
| 14    | 700.217   | 2.334 | 4.1    |       |           |       |        |
| 15    | 692.250   | 2.307 | 3.4    |       |           |       |        |
| 16    | 681.262   | 2.271 | 2.8    |       |           |       |        |
| 17    | 672.197   | 2.240 | 0.8    |       |           |       |        |
| 18    | 614.509   | 2.048 | 2.6    |       |           |       |        |
| 19    | 601.598   | 2.005 | 2.1    |       |           |       |        |
| 20    | 581.545   | 1.938 | 1.7    |       |           |       |        |
| 21    | 573.304   | 1.911 | 1.3    |       |           |       |        |
| 22    | 569.183   | 1.897 | 1.3    |       |           |       |        |
| 23    | 564.239   | 1.880 | 1.2    |       |           |       |        |
| 24    | 559.844   | 1.866 | 1.0    |       |           |       |        |
| 25    | 524.956   | 1.750 | 1.9    |       |           |       |        |
| 26    | 519.462   | 1.731 | 2.1    |       |           |       |        |
| 27    | 514.792   | 1.716 | 2.6    |       |           |       |        |
| 28    | 509.573   | 1.698 | 2.7    |       |           |       |        |
| 29    | 497.761   | 1.659 | 0.8    |       |           |       |        |
| 30    | 441.722   | 1.472 | 1.9    |       |           |       |        |
| 31    | 438.425   | 1.461 | 1.8    |       |           |       |        |
| 32    | 432.107   | 1.440 | 2.7    |       |           |       |        |
| 33    | 424.690   | 1.415 | 1.8    |       |           |       |        |
| 34    | 383.485   | 1.278 | 0.8    |       |           |       |        |
| 35    | 371.398   | 1.238 | 1.8    |       |           |       |        |
| 36    | 366.453   | 1.221 | 2.0    |       |           |       |        |
| 37    | 353.817   | 1.179 | 3.1    |       |           |       |        |
| 38    | 347.499   | 1.158 | 1.8    |       |           |       |        |
| 39    | 342.005   | 1.140 | 2.1    |       |           |       |        |

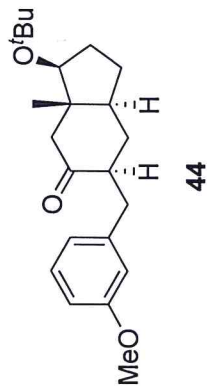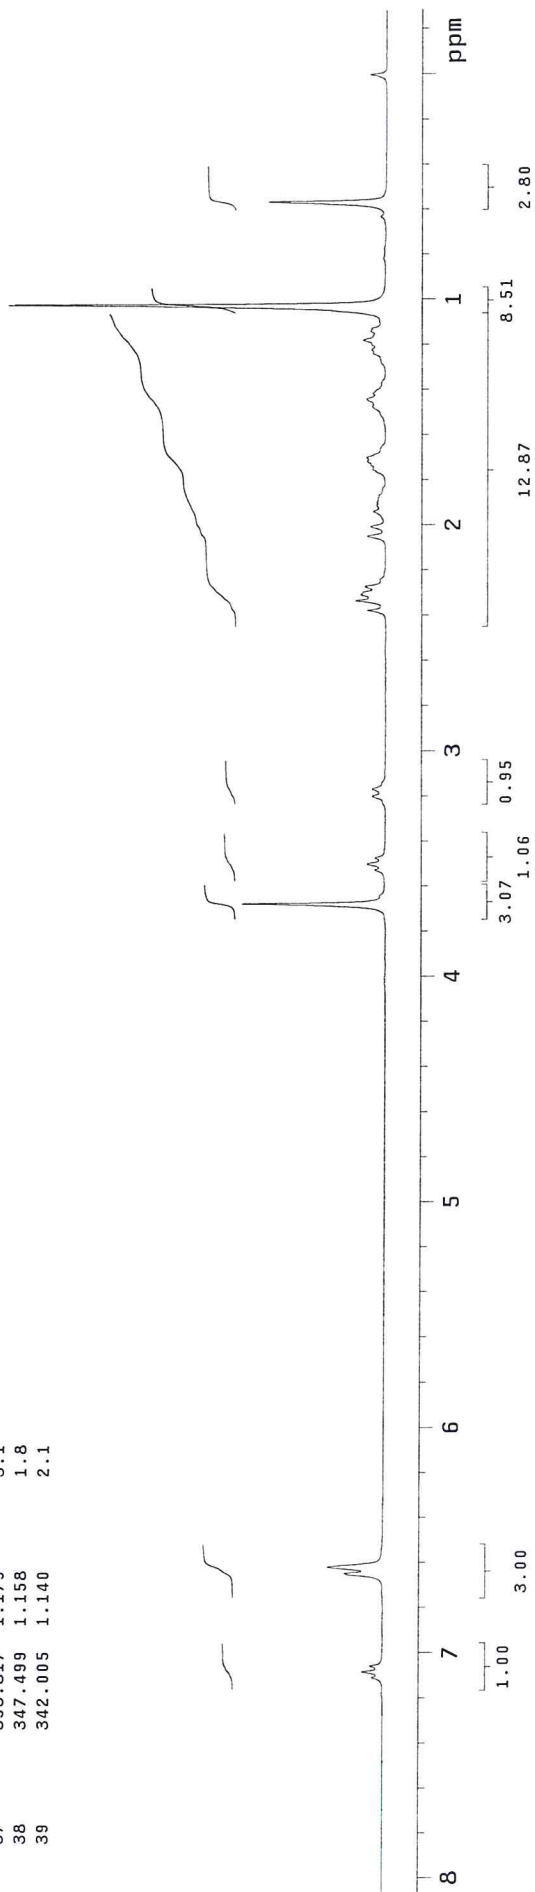



| INDEX | FREQUENCY | PPM   | HEIGHT | INDEX | FREQUENCY | PPM    | HEIGHT |
|-------|-----------|-------|--------|-------|-----------|--------|--------|
| 1     | 2195.971  | 7.319 | 0.9    | 40    | 676.317   | 2.254  | 4.6    |
| 2     | 2195.147  | 7.316 | 0.9    | 41    | 663.956   | 2.213  | 5.4    |
| 3     | 2193.499  | 7.311 | 0.8    | 42    | 620.278   | 2.067  | 5.8    |
| 4     | 2178.116  | 7.259 | 1.2    | 43    | 619.179   | 2.064  | 6.3    |
| 5     | 2171.248  | 7.236 | 12.1   | 44    | 551.877   | 1.839  | 1.3    |
| 6     | 2170.424  | 7.234 | 12.1   | 45    | 543.087   | 1.810  | 2.1    |
| 7     | 2165.754  | 7.218 | 4.6    | 46    | 539.241   | 1.797  | 2.1    |
| 8     | 2164.930  | 7.215 | 4.2    | 47    | 529.626   | 1.765  | 6.3    |
| 9     | 2143.503  | 7.144 | 1.2    | 48    | 526.605   | 1.755  | 3.7    |
| 10    | 2142.404  | 7.140 | 1.3    | 49    | 518.913   | 1.729  | 3.8    |
| 11    | 2138.284  | 7.126 | 2.1    | 50    | 488.421   | 1.628  | 1.7    |
| 12    | 2137.460  | 7.124 | 2.1    | 51    | 459.577   | 1.532  | 2.5    |
| 13    | 2129.768  | 7.098 | 4.1    | 52    | 458.478   | 1.528  | 2.6    |
| 14    | 2128.944  | 7.095 | 3.5    | 53    | 456.006   | 1.520  | 2.4    |
| 15    | 2122.626  | 7.074 | 2.5    | 54    | 454.907   | 1.516  | 2.4    |
| 16    | 2121.252  | 7.070 | 2.3    | 55    | 420.844   | 1.403  | 3.5    |
| 17    | 2004.229  | 6.680 | 4.6    | 56    | 417.273   | 1.391  | 4.0    |
| 18    | 1996.537  | 6.654 | 8.1    | 57    | 413.427   | 1.378  | 4.7    |
| 19    | 1989.395  | 6.630 | 11.9   | 58    | 409.307   | 1.364  | 5.0    |
| 20    | 1422.959  | 4.742 | 6.2    | 59    | 402.714   | 1.342  | 6.3    |
| 21    | 1409.498  | 4.698 | 6.1    | 60    | 396.670   | 1.322  | 5.7    |
| 22    | 1108.699  | 3.695 | 38.3   | 61    | 387.605   | 1.292  | 5.1    |
| 23    | 1107.875  | 3.692 | 38.1   | 62    | 375.244   | 1.251  | 4.4    |
| 24    | 1102.930  | 3.676 | 1.6    | 63    | 371.947   | 1.240  | 4.7    |
| 25    | 1102.106  | 3.673 | 1.6    | 64    | 352.993   | 1.176  | 33.7   |
| 26    | 1096.337  | 3.654 | 1.9    | 65    | 330.467   | 1.101  | 4.3    |
| 27    | 1095.239  | 3.650 | 1.9    | 66    | 316.732   | 1.056  | 100.0  |
| 28    | 1089.745  | 3.632 | 0.8    | 67    | 315.908   | 1.053  | 99.2   |
| 29    | 1016.399  | 3.387 | 2.3    | 68    | 295.855   | 0.986  | 2.2    |
| 30    | 1008.158  | 3.360 | 3.9    | 69    | 264.538   | 0.882  | 2.8    |
| 31    | 1000.192  | 3.333 | 2.4    | 70    | 253.001   | 0.843  | 5.4    |
| 32    | 925.198   | 3.084 | 2.3    | 71    | 239.815   | 0.799  | 11.5   |
| 33    | 921.077   | 3.070 | 2.3    | 72    | 232.124   | 0.774  | 11.0   |
| 34    | 912.012   | 3.040 | 2.7    | 73    | 225.805   | 0.753  | 6.0    |
| 35    | 907.892   | 3.026 | 2.5    | 74    | 166.195   | 0.554  | 32.6   |
| 36    | 711.205   | 2.370 | 2.3    | 75    | 0.000     | 0.000  | 2.7    |
| 37    | 701.041   | 2.336 | 3.3    | 76    | -23.899   | -0.080 | 1.2    |
| 38    | 698.019   | 2.326 | 2.3    | 77    | -24.998   | -0.083 | 1.2    |
| 39    | 687.855   | 2.292 | 2.8    |       |           |        |        |

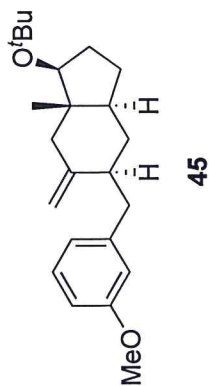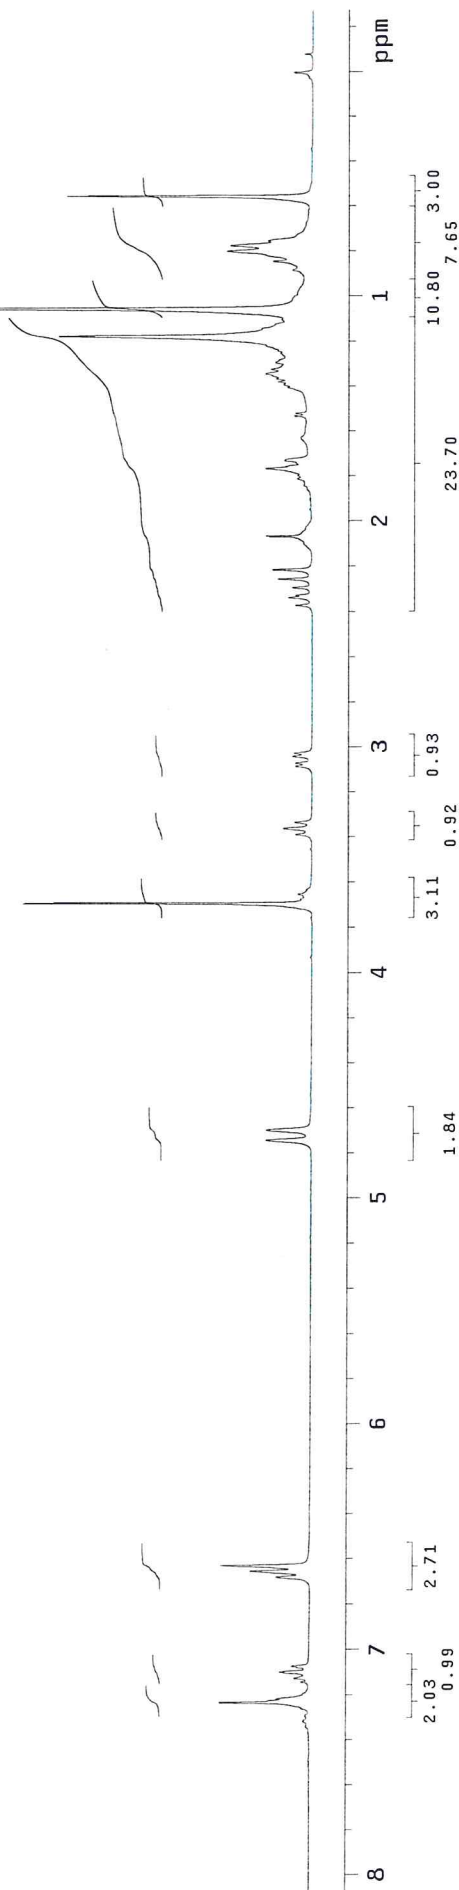

| INDEX | FREQUENCY | PPM     | HEIGHT |
|-------|-----------|---------|--------|
| 1     | 12049.986 | 159.715 | 5.7    |
| 2     | 11346.837 | 150.395 | 8.9    |
| 3     | 10806.305 | 143.230 | 9.0    |
| 4     | 9751.580  | 129.251 | 16.0   |
| 5     | 9721.805  | 128.856 | 5.4    |
| 6     | 9702.337  | 128.598 | 6.0    |
| 7     | 9184.709  | 121.737 | 14.2   |
| 8     | 8683.114  | 115.089 | 14.0   |
| 9     | 8377.347  | 111.036 | 15.6   |
| 10    | 8184.954  | 108.486 | 11.0   |
| 11    | 6033.133  | 79.965  | 13.2   |
| 12    | 5857.918  | 77.643  | 7.9    |
| 13    | 5825.853  | 77.218  | 8.2    |
| 14    | 5794.932  | 76.808  | 7.3    |
| 15    | 5460.536  | 72.376  | 9.0    |
| 16    | 4166.465  | 55.224  | 14.2   |
| 17    | 3675.177  | 48.712  | 13.8   |
| 18    | 3404.911  | 45.130  | 15.0   |
| 19    | 3365.974  | 44.614  | 10.6   |
| 20    | 3327.038  | 44.098  | 19.6   |
| 21    | 2946.833  | 39.058  | 17.4   |
| 22    | 2417.753  | 32.046  | 15.3   |
| 23    | 2400.575  | 31.818  | 15.0   |
| 24    | 2255.135  | 29.890  | 13.2   |
| 25    | 2181.843  | 28.919  | 51.1   |
| 26    | 1931.045  | 25.595  | 15.4   |
| 27    | 841.965   | 11.160  | 15.8   |

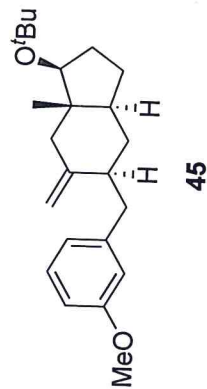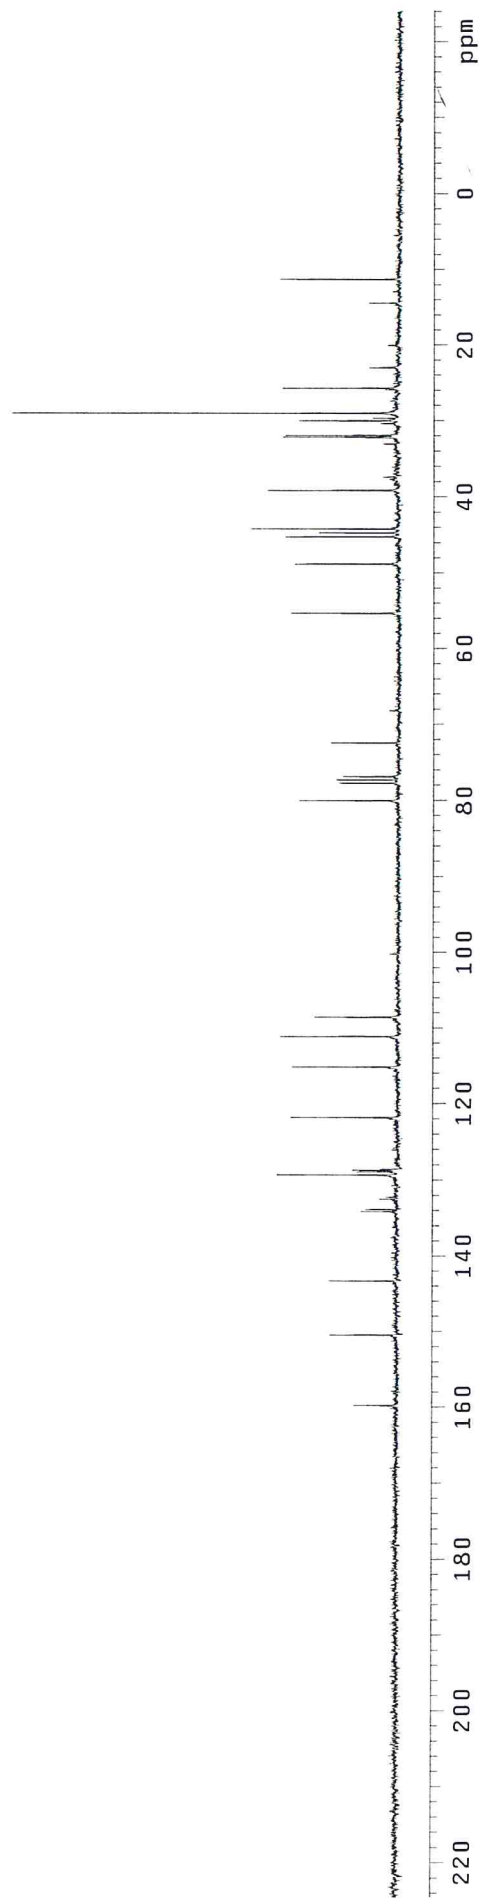

| INDEX | FREQUENCY | PPM   | HEIGHT | INDEX | FREQUENCY | PPM   | HEIGHT |
|-------|-----------|-------|--------|-------|-----------|-------|--------|
| 1     | 2140.845  | 7.135 | 2.6    | 40    | 507.190   | 1.690 | 2.4    |
| 2     | 2133.154  | 7.109 | 3.7    | 41    | 398.682   | 1.329 | 5.6    |
| 3     | 2132.055  | 7.106 | 3.7    | 42    | 393.463   | 1.311 | 5.7    |
| 4     | 2129.033  | 7.096 | 1.9    | 43    | 383.848   | 1.279 | 6.3    |
| 5     | 2124.638  | 7.081 | 3.2    | 44    | 380.552   | 1.268 | 6.5    |
| 6     | 2010.087  | 6.699 | 4.6    | 45    | 373.410   | 1.245 | 5.9    |
| 7     | 2001.571  | 6.671 | 6.3    | 46    | 369.839   | 1.233 | 6.0    |
| 8     | 1998.000  | 6.659 | 9.4    | 47    | 360.499   | 1.201 | 8.0    |
| 9     | 1996.077  | 6.653 | 7.8    | 48    | 356.104   | 1.187 | 7.2    |
| 10    | 1992.781  | 6.642 | 6.2    | 49    | 353.357   | 1.178 | 9.9    |
| 11    | 1215.922  | 4.052 | 2.0    | 50    | 349.511   | 1.165 | 6.1    |
| 12    | 1208.780  | 4.029 | 2.0    | 51    | 346.214   | 1.154 | 7.8    |
| 13    | 1145.873  | 3.819 | 2.2    | 52    | 343.193   | 1.144 | 7.3    |
| 14    | 1138.731  | 3.795 | 2.7    | 53    | 337.424   | 1.125 | 7.6    |
| 15    | 1135.160  | 3.783 | 3.4    | 54    | 329.457   | 1.098 | 9.1    |
| 16    | 1128.292  | 3.760 | 3.6    | 55    | 323.414   | 1.078 | 14.1   |
| 17    | 1112.085  | 3.706 | 39.5   | 56    | 316.272   | 1.054 | 33.4   |
| 18    | 1081.318  | 3.604 | 3.4    | 57    | 313.799   | 1.046 | 100.0  |
| 19    | 1074.450  | 3.581 | 3.7    | 58    | 299.240   | 0.997 | 6.2    |
| 20    | 1070.605  | 3.568 | 3.3    | 59    | 265.177   | 0.884 | 2.8    |
| 21    | 1063.737  | 3.545 | 2.8    | 60    | 258.035   | 0.860 | 2.9    |
| 22    | 985.447   | 3.284 | 2.3    | 61    | 250.343   | 0.834 | 3.1    |
| 23    | 978.579   | 3.261 | 3.1    | 62    | 243.476   | 0.811 | 2.7    |
| 24    | 976.931   | 3.256 | 3.2    | 63    | 236.059   | 0.787 | 2.4    |
| 25    | 969.514   | 3.231 | 2.4    | 64    | 210.511   | 0.702 | 2.8    |
| 26    | 828.592   | 2.762 | 1.9    | 65    | 194.304   | 0.648 | 28.6   |
| 27    | 823.098   | 2.743 | 2.1    | 66    | 186.887   | 0.623 | 5.4    |
| 28    | 815.131   | 2.717 | 2.5    |       |           |       |        |
| 29    | 809.637   | 2.698 | 2.4    |       |           |       |        |
| 30    | 718.436   | 2.394 | 2.2    |       |           |       |        |
| 31    | 708.821   | 2.362 | 2.7    |       |           |       |        |
| 32    | 705.250   | 2.350 | 2.2    |       |           |       |        |
| 33    | 695.086   | 2.317 | 2.0    |       |           |       |        |
| 34    | 599.215   | 1.997 | 3.9    |       |           |       |        |
| 35    | 588.777   | 1.962 | 12.7   |       |           |       |        |
| 36    | 586.304   | 1.954 | 7.5    |       |           |       |        |
| 37    | 528.617   | 1.762 | 5.3    |       |           |       |        |
| 38    | 525.046   | 1.750 | 5.1    |       |           |       |        |
| 39    | 515.706   | 1.719 | 3.8    |       |           |       |        |

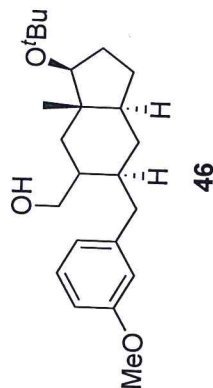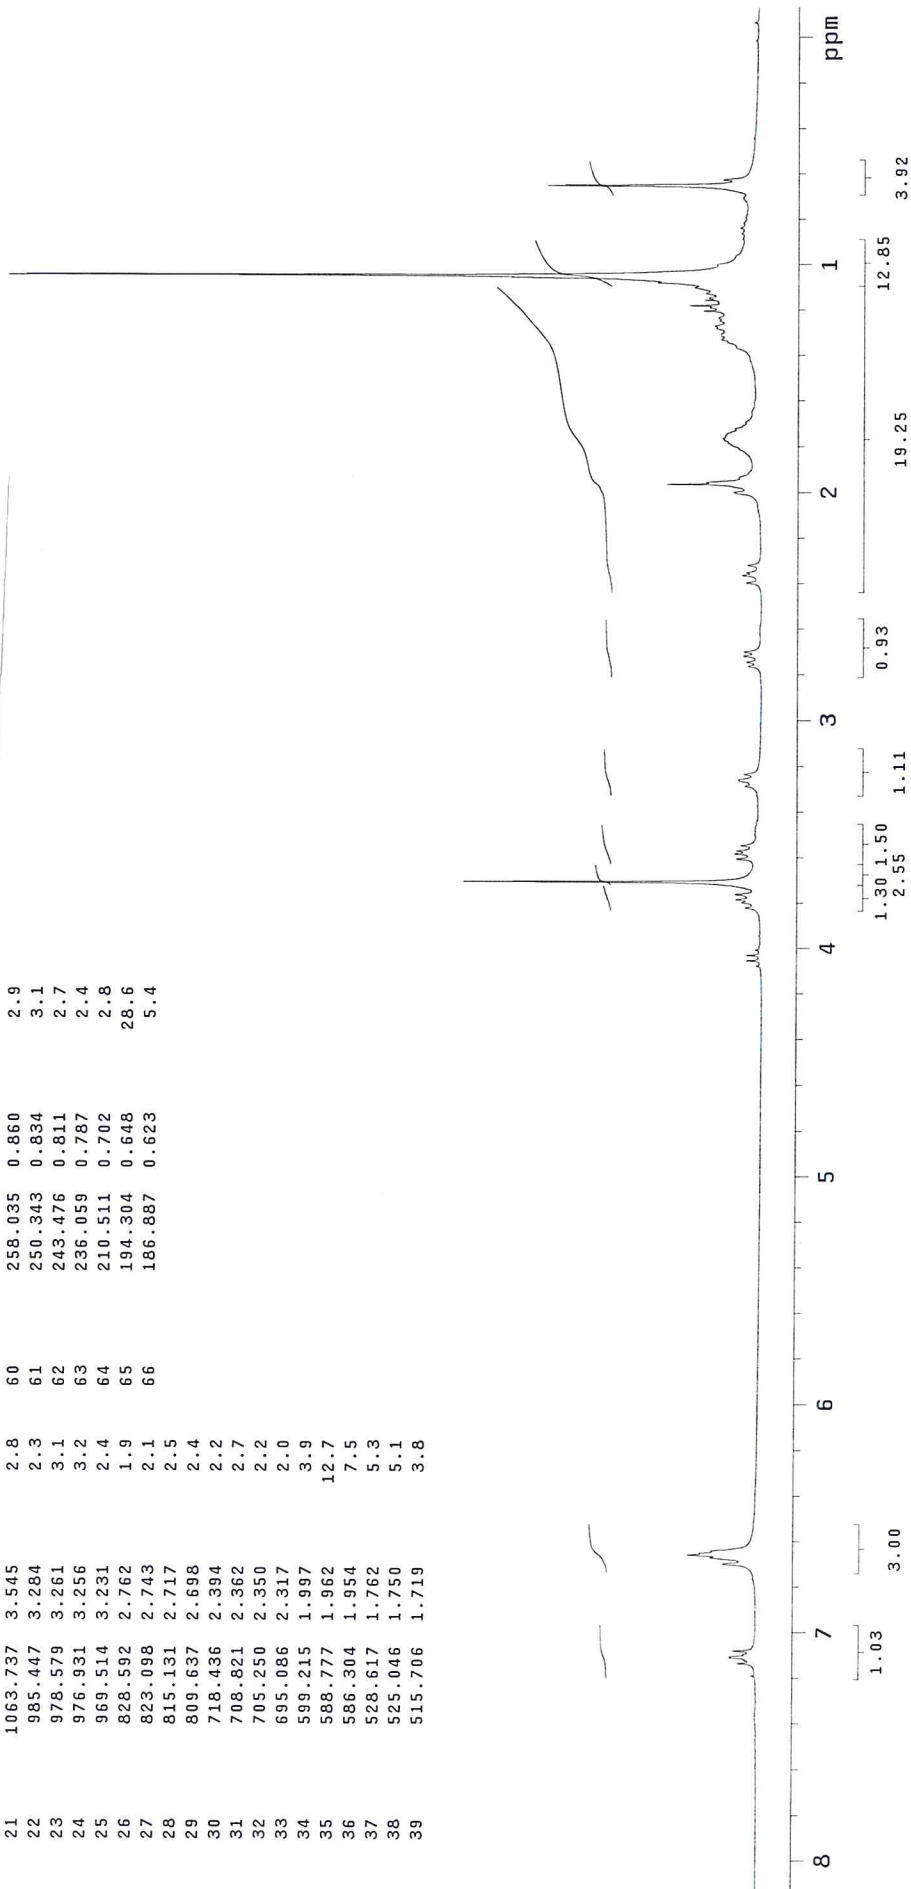

| INDEX | FREQUENCY | PPM     | HEIGHT |
|-------|-----------|---------|--------|
| 1     | 12042.888 | 159.621 | 6.8    |
| 2     | 10814.094 | 143.334 | 8.9    |
| 3     | 9747.918  | 129.202 | 14.6   |
| 4     | 9173.030  | 121.582 | 13.1   |
| 5     | 8671.435  | 114.934 | 15.1   |
| 6     | 8372.539  | 110.972 | 12.8   |
| 7     | 6160.023  | 81.647  | 13.5   |
| 8     | 5857.691  | 77.640  | 5.8    |
| 9     | 5825.626  | 77.215  | 6.0    |
| 10    | 5794.706  | 76.805  | 5.4    |
| 11    | 5451.147  | 72.251  | 10.0   |
| 12    | 4830.452  | 64.024  | 12.3   |
| 13    | 4162.803  | 55.175  | 14.0   |
| 14    | 3489.429  | 46.250  | 16.0   |
| 15    | 3281.003  | 43.488  | 15.8   |
| 16    | 3187.097  | 42.243  | 9.5    |
| 17    | 3118.385  | 41.332  | 13.2   |
| 18    | 3029.060  | 40.148  | 27.7   |
| 19    | 2354.540  | 31.208  | 13.4   |
| 20    | 2175.890  | 28.840  | 50.6   |
| 21    | 2094.581  | 27.762  | 13.3   |
| 22    | 1953.722  | 25.895  | 15.4   |
| 23    | 1005.501  | 13.327  | 16.1   |

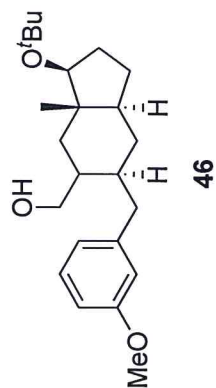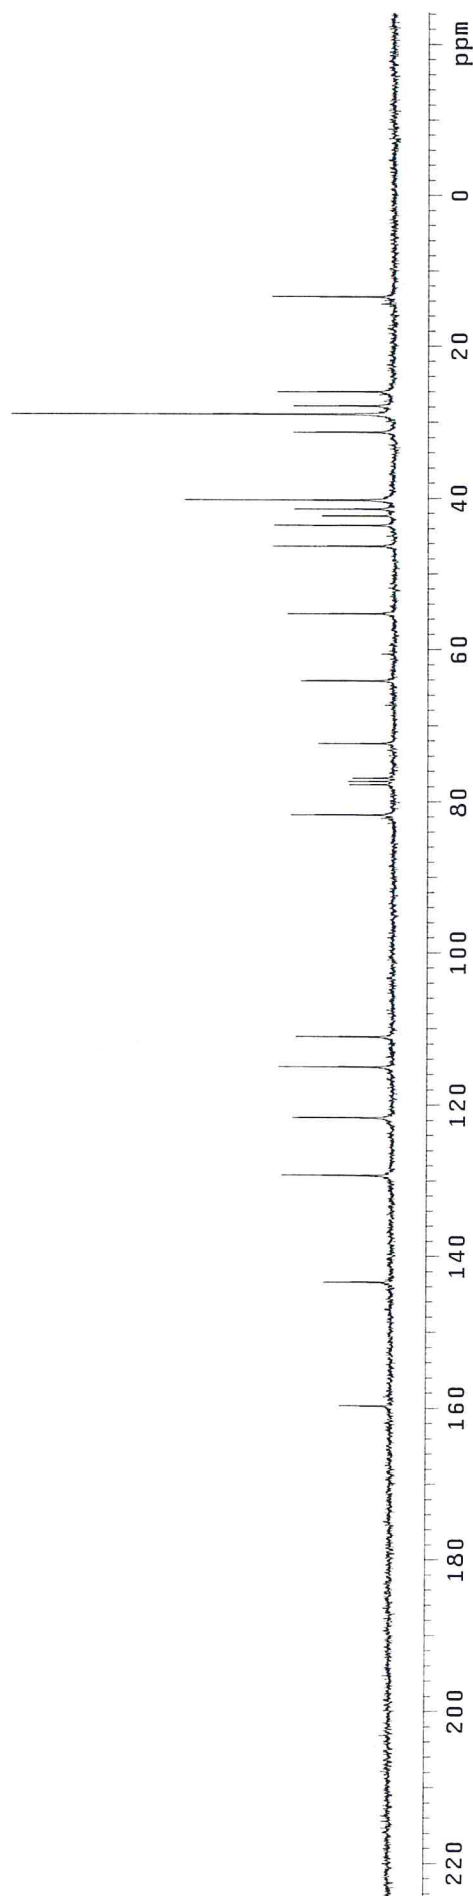

| INDEX | FREQUENCY | PPM   | HEIGHT | INDEX | FREQUENCY | PPM   | HEIGHT |
|-------|-----------|-------|--------|-------|-----------|-------|--------|
| 1     | 2941.878  | 9.805 | 8.5    | 40    | 401.155   | 1.337 | 2.4    |
| 2     | 2136.725  | 7.121 | 3.0    | 41    | 394.562   | 1.315 | 2.0    |
| 3     | 2129.308  | 7.097 | 5.1    | 42    | 385.222   | 1.284 | 4.4    |
| 4     | 2121.067  | 7.069 | 3.2    | 43    | 377.530   | 1.258 | 4.1    |
| 5     | 1999.374  | 6.664 | 8.8    | 44    | 373.959   | 1.246 | 4.3    |
| 6     | 1997.451  | 6.657 | 8.2    | 45    | 371.212   | 1.237 | 4.5    |
| 7     | 1991.132  | 6.636 | 8.4    | 46    | 364.345   | 1.214 | 7.0    |
| 8     | 1989.484  | 6.631 | 8.7    | 47    | 359.949   | 1.200 | 5.5    |
| 9     | 1985.364  | 6.617 | 7.2    | 48    | 353.631   | 1.179 | 3.7    |
| 10    | 1108.514  | 3.694 | 39.2   | 49    | 352.807   | 1.176 | 3.8    |
| 11    | 999.182   | 3.330 | 2.5    | 50    | 347.313   | 1.158 | 1.5    |
| 12    | 992.314   | 3.307 | 3.8    | 51    | 345.665   | 1.152 | 1.6    |
| 13    | 983.524   | 3.278 | 2.2    | 52    | 330.282   | 1.101 | 4.8    |
| 14    | 893.971   | 2.979 | 1.7    | 53    | 323.414   | 1.078 | 4.3    |
| 15    | 885.730   | 2.952 | 2.1    | 54    | 311.876   | 1.039 | 100.0  |
| 16    | 880.511   | 2.935 | 3.2    | 55    | 157.768   | 0.526 | 29.5   |
| 17    | 872.544   | 2.908 | 3.2    |       |           |       |        |
| 18    | 850.843   | 2.836 | 3.1    |       |           |       |        |
| 19    | 843.151   | 2.810 | 3.3    |       |           |       |        |
| 20    | 837.382   | 2.791 | 1.8    |       |           |       |        |
| 21    | 829.691   | 2.765 | 1.8    |       |           |       |        |
| 22    | 682.450   | 2.274 | 3.6    |       |           |       |        |
| 23    | 664.320   | 2.214 | 3.9    |       |           |       |        |
| 24    | 650.859   | 2.169 | 4.3    |       |           |       |        |
| 25    | 589.326   | 1.964 | 1.9    |       |           |       |        |
| 26    | 587.952   | 1.960 | 2.8    |       |           |       |        |
| 27    | 548.395   | 1.828 | 1.6    |       |           |       |        |
| 28    | 544.824   | 1.816 | 2.0    |       |           |       |        |
| 29    | 538.781   | 1.796 | 2.0    |       |           |       |        |
| 30    | 534.660   | 1.782 | 2.4    |       |           |       |        |
| 31    | 530.540   | 1.768 | 2.4    |       |           |       |        |
| 32    | 522.573   | 1.742 | 2.5    |       |           |       |        |
| 33    | 511.585   | 1.705 | 1.9    |       |           |       |        |
| 34    | 440.437   | 1.468 | 5.4    |       |           |       |        |
| 35    | 435.767   | 1.452 | 6.1    |       |           |       |        |
| 36    | 431.921   | 1.440 | 6.1    |       |           |       |        |
| 37    | 419.835   | 1.399 | 4.5    |       |           |       |        |
| 38    | 411.319   | 1.371 | 3.0    |       |           |       |        |
| 39    | 408.022   | 1.360 | 3.0    |       |           |       |        |

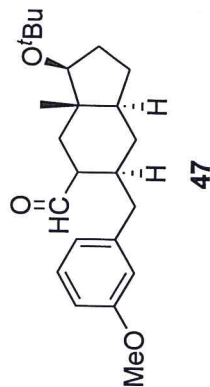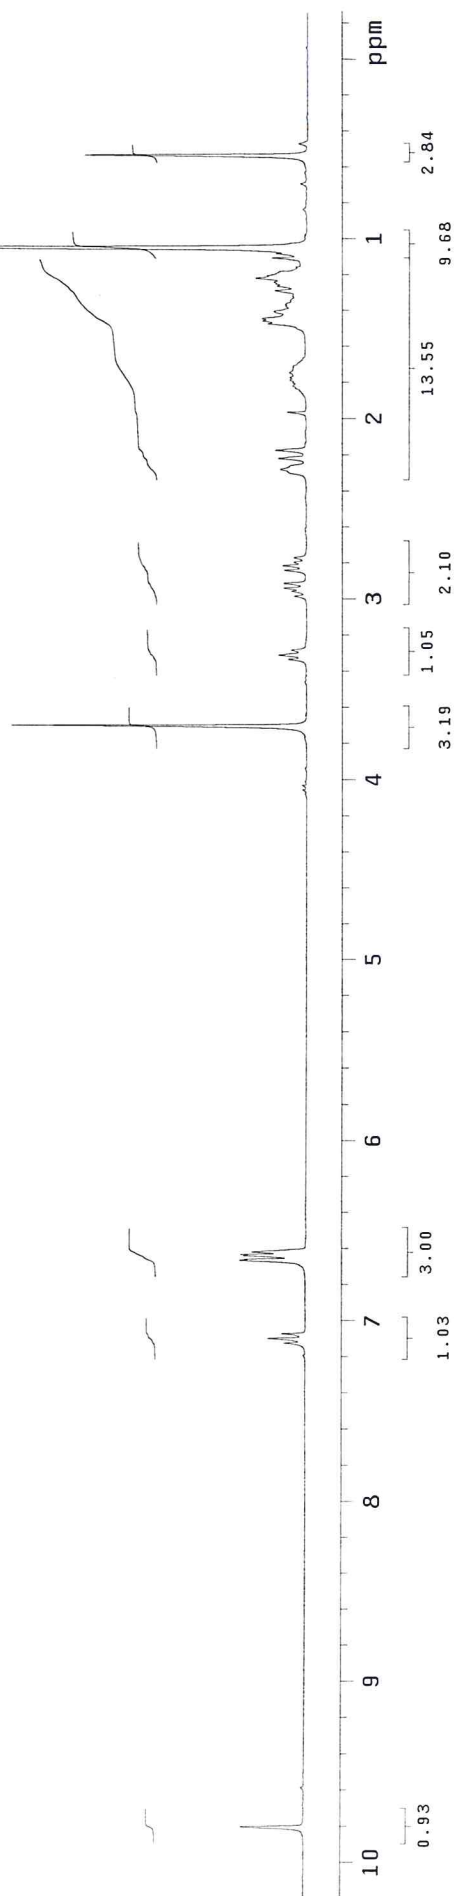



| INDEX | FREQUENCY | PPM     | HEIGHT |
|-------|-----------|---------|--------|
| 1     | 15492.215 | 205.339 | 8.4    |
| 2     | 12050.905 | 159.727 | 4.9    |
| 3     | 10774.012 | 142.802 | 7.8    |
| 4     | 9760.515  | 129.369 | 13.8   |
| 5     | 9161.578  | 121.431 | 14.7   |
| 6     | 8658.838  | 114.767 | 11.4   |
| 7     | 8395.443  | 111.276 | 13.5   |
| 8     | 6095.892  | 80.797  | 13.8   |
| 9     | 5858.836  | 77.655  | 3.1    |
| 10    | 5826.771  | 77.230  | 3.6    |
| 11    | 5794.706  | 76.805  | 3.6    |
| 12    | 5460.309  | 72.373  | 8.4    |
| 13    | 4162.803  | 55.175  | 12.6   |
| 14    | 3720.758  | 49.316  | 14.1   |
| 15    | 3452.782  | 45.764  | 14.2   |
| 16    | 3234.050  | 42.865  | 10.2   |
| 17    | 3222.598  | 42.713  | 15.2   |
| 18    | 2987.833  | 39.602  | 13.6   |
| 19    | 2976.381  | 39.450  | 13.0   |
| 20    | 2355.686  | 31.223  | 13.5   |
| 21    | 2198.794  | 29.144  | 13.4   |
| 22    | 2171.309  | 28.779  | 50.0   |
| 23    | 1951.432  | 25.865  | 13.0   |
| 24    | 990.613   | 13.130  | 16.7   |

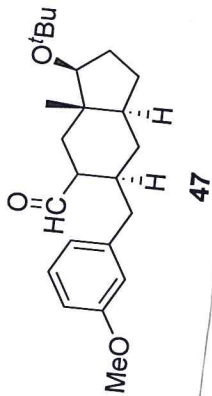

47

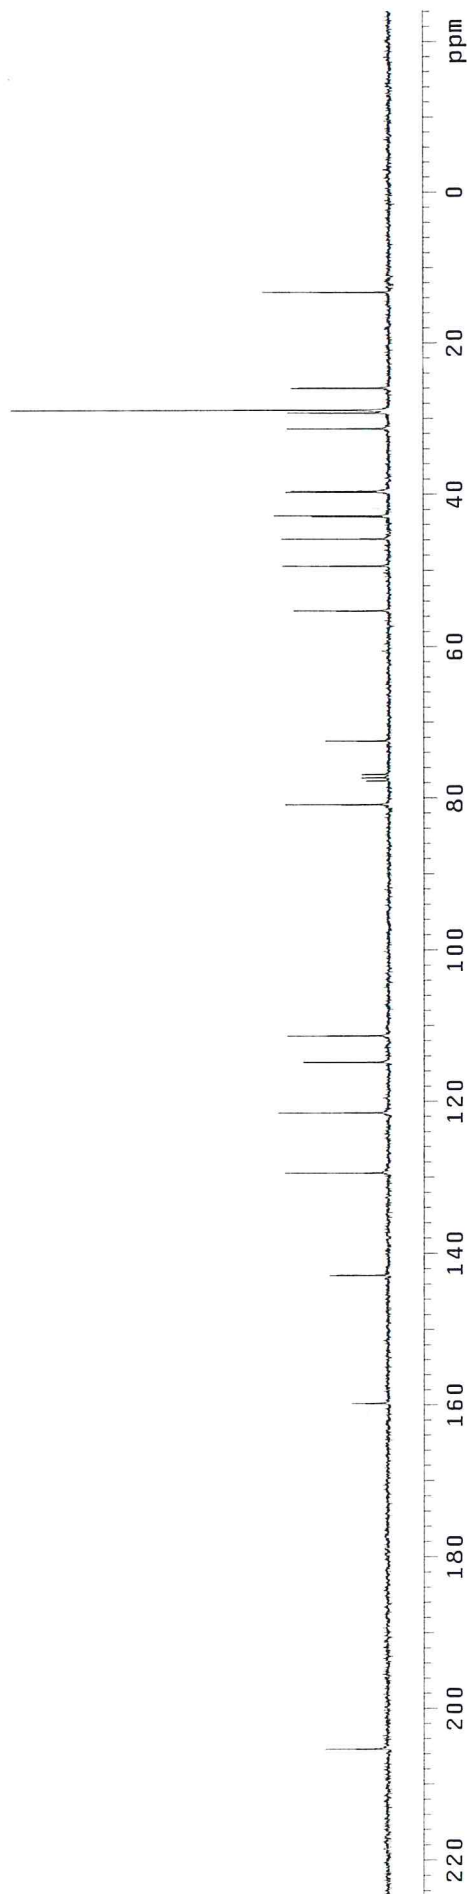

| INDEX | FREQUENCY | PPM   | HEIGHT | INDEX | FREQUENCY | PPM   | HEIGHT |
|-------|-----------|-------|--------|-------|-----------|-------|--------|
| 1     | 2171.248  | 7.236 | 2.0    | 40    | 439.799   | 1.466 | 5.2    |
| 2     | 2066.037  | 6.886 | 7.7    | 41    | 436.502   | 1.455 | 4.6    |
| 3     | 2061.092  | 6.869 | 3.9    | 42    | 434.305   | 1.447 | 4.2    |
| 4     | 2056.972  | 6.855 | 9.5    | 43    | 431.283   | 1.437 | 4.3    |
| 5     | 1995.988  | 6.652 | 11.4   | 44    | 424.141   | 1.414 | 2.8    |
| 6     | 1990.769  | 6.635 | 12.8   | 45    | 416.998   | 1.390 | 3.2    |
| 7     | 1839.133  | 6.129 | 10.0   | 46    | 410.680   | 1.369 | 3.7    |
| 8     | 1135.345  | 3.784 | 5.4    | 47    | 406.285   | 1.354 | 3.9    |
| 9     | 1129.851  | 3.766 | 75.9   | 48    | 400.516   | 1.335 | 3.7    |
| 10    | 1049.913  | 3.499 | 4.4    | 49    | 394.747   | 1.316 | 3.6    |
| 11    | 1041.946  | 3.473 | 7.2    | 50    | 389.528   | 1.298 | 3.6    |
| 12    | 1033.431  | 3.444 | 4.3    | 51    | 382.935   | 1.276 | 2.7    |
| 13    | 851.852   | 2.839 | 3.3    | 52    | 375.793   | 1.252 | 6.1    |
| 14    | 844.985   | 2.816 | 3.9    | 53    | 369.200   | 1.230 | 4.7    |
| 15    | 836.469   | 2.788 | 5.6    | 54    | 348.872   | 1.163 | 200.0  |
| 16    | 829.601   | 2.765 | 5.8    | 55    | 340.906   | 1.136 | 9.0    |
| 17    | 797.461   | 2.658 | 3.9    | 56    | 333.763   | 1.112 | 2.0    |
| 18    | 782.627   | 2.608 | 6.6    | 57    | 215.916   | 0.720 | 55.2   |
| 19    | 767.519   | 2.558 | 3.6    |       |           |       |        |
| 20    | 734.554   | 2.448 | 7.6    |       |           |       |        |
| 21    | 720.544   | 2.401 | 10.6   |       |           |       |        |
| 22    | 712.578   | 2.375 | 2.6    |       |           |       |        |
| 23    | 588.687   | 1.962 | 2.7    |       |           |       |        |
| 24    | 583.468   | 1.945 | 3.7    |       |           |       |        |
| 25    | 575.502   | 1.918 | 10.1   |       |           |       |        |
| 26    | 561.766   | 1.872 | 8.2    |       |           |       |        |
| 27    | 553.800   | 1.846 | 3.1    |       |           |       |        |
| 28    | 496.387   | 1.654 | 2.6    |       |           |       |        |
| 29    | 486.773   | 1.622 | 2.1    |       |           |       |        |
| 30    | 483.202   | 1.610 | 2.3    |       |           |       |        |
| 31    | 479.905   | 1.599 | 3.7    |       |           |       |        |
| 32    | 473.587   | 1.578 | 3.2    |       |           |       |        |
| 33    | 470.016   | 1.566 | 3.7    |       |           |       |        |
| 34    | 462.050   | 1.540 | 4.1    |       |           |       |        |
| 35    | 456.006   | 1.520 | 3.9    |       |           |       |        |
| 36    | 452.984   | 1.510 | 4.4    |       |           |       |        |
| 37    | 449.413   | 1.498 | 3.8    |       |           |       |        |
| 38    | 445.018   | 1.483 | 5.7    |       |           |       |        |
| 39    | 442.820   | 1.476 | 5.6    |       |           |       |        |

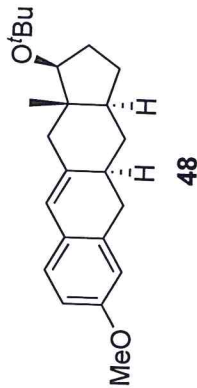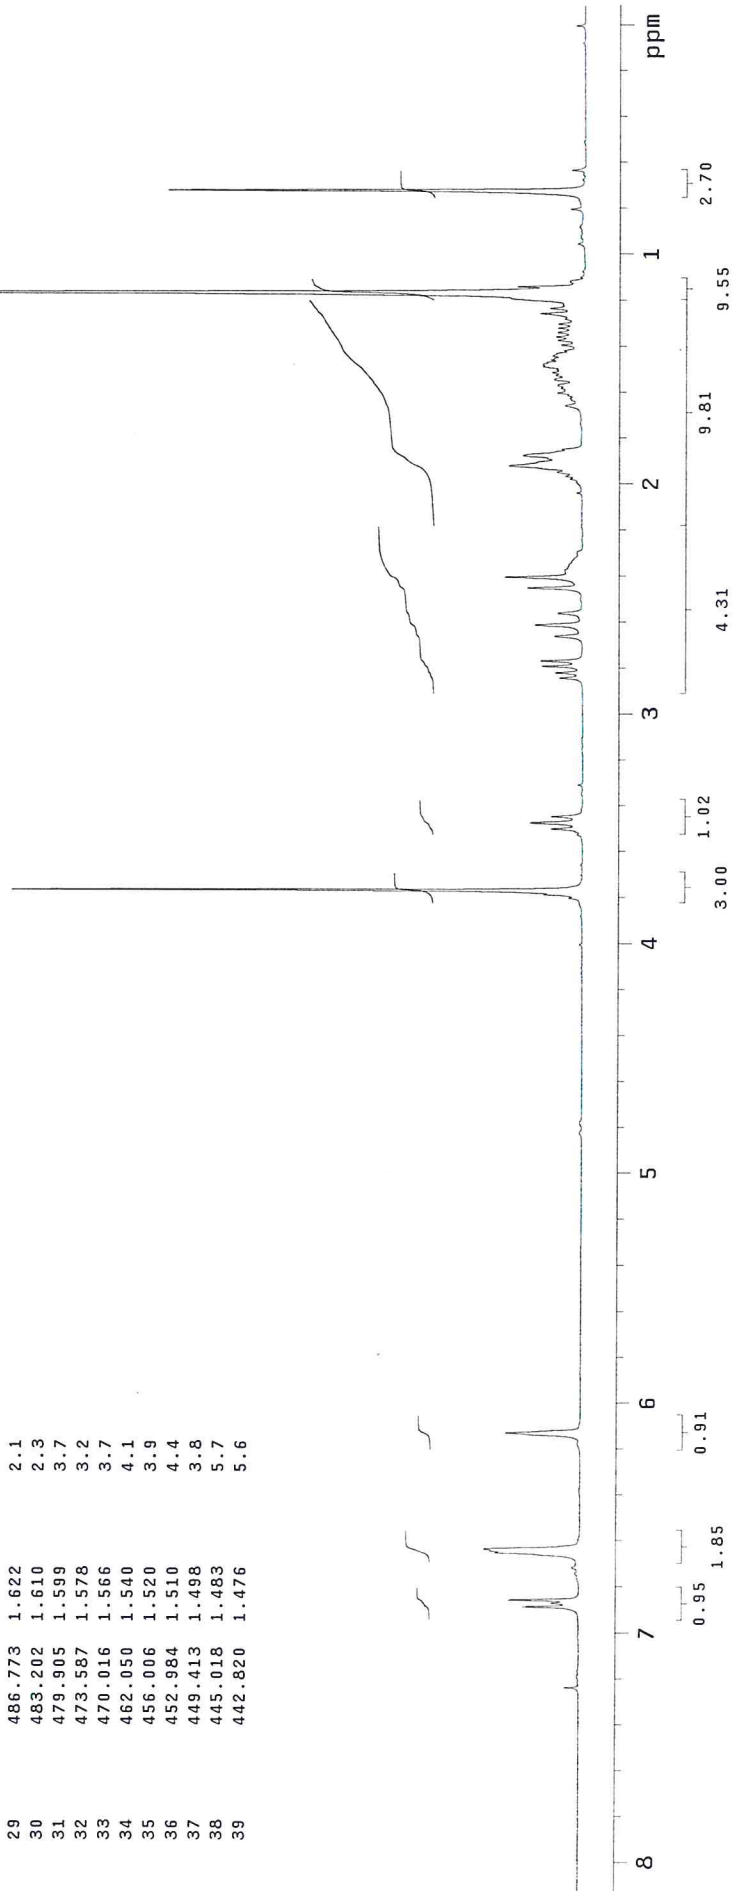

| INDEX | FREQUENCY | PPM     | HEIGHT |
|-------|-----------|---------|--------|
| 1     | 11936.385 | 158.209 | 6.6    |
| 2     | 10534.666 | 139.630 | 9.7    |
| 3     | 10280.433 | 136.260 | 9.4    |
| 4     | 9676.915  | 128.261 | 8.6    |
| 5     | 9509.717  | 126.045 | 19.1   |
| 6     | 9320.760  | 123.541 | 18.1   |
| 7     | 8555.770  | 113.401 | 18.3   |
| 8     | 8386.281  | 111.155 | 15.1   |
| 9     | 6038.632  | 80.038  | 17.9   |
| 10    | 5857.691  | 77.640  | 11.0   |
| 11    | 5825.625  | 77.215  | 11.1   |
| 12    | 5793.560  | 76.790  | 10.0   |
| 13    | 5466.034  | 72.449  | 9.3    |
| 14    | 4181.126  | 55.418  | 17.7   |
| 15    | 3499.735  | 46.387  | 14.7   |
| 16    | 3307.342  | 43.837  | 18.5   |
| 17    | 3287.874  | 43.579  | 11.2   |
| 18    | 2796.585  | 37.067  | 16.4   |
| 19    | 2725.583  | 36.126  | 18.1   |
| 20    | 2601.902  | 34.486  | 17.1   |
| 21    | 2377.444  | 31.511  | 16.1   |
| 22    | 2183.906  | 28.946  | 51.5   |
| 23    | 1943.415  | 25.759  | 19.6   |
| 24    | 869.222   | 11.521  | 19.9   |

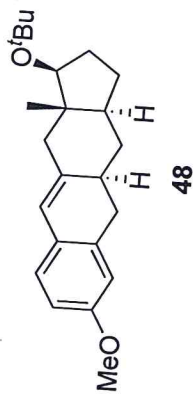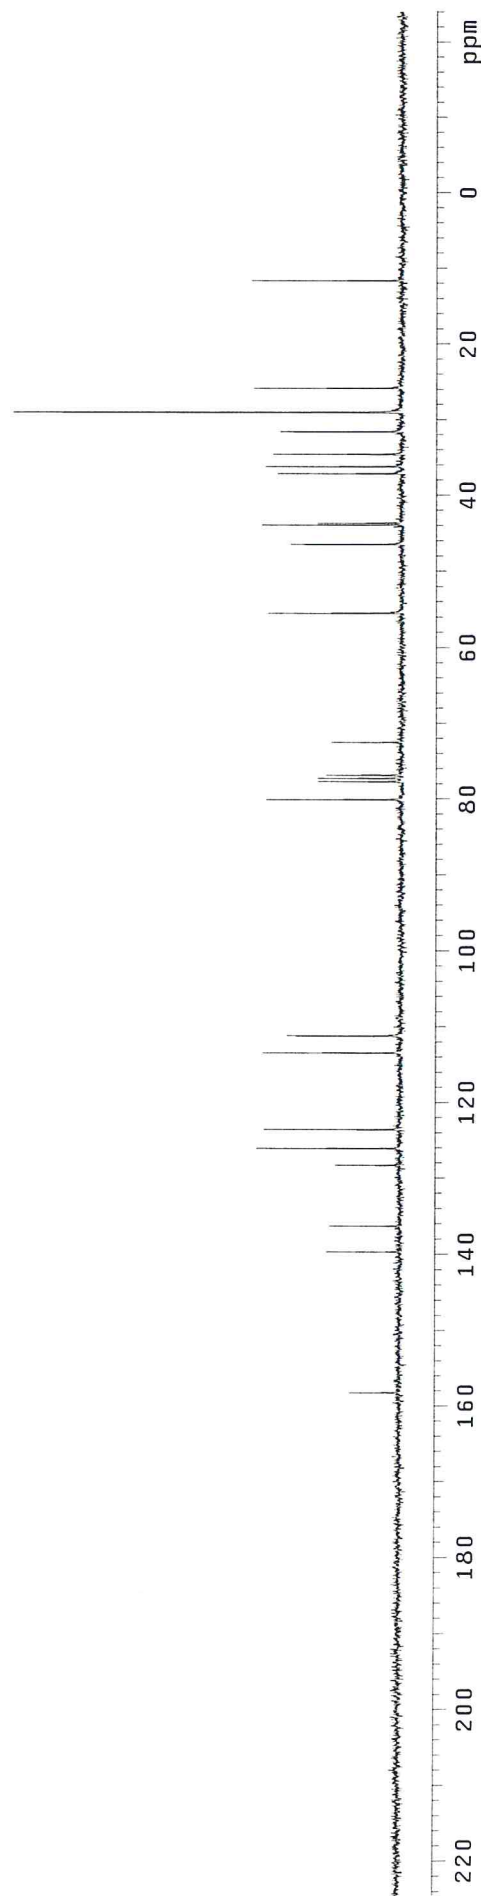

B-4

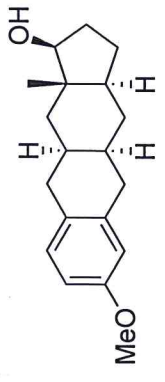

49

| INDEX | FREQUENCY | PPM   | HEIGHT | INDEX | FREQUENCY | PPM   | HEIGHT |
|-------|-----------|-------|--------|-------|-----------|-------|--------|
| 1     | 2075.191  | 6.916 | 4.7    | 40    | 412.418   | 1.375 | 2.2    |
| 2     | 2067.225  | 6.890 | 5.7    | 41    | 404.726   | 1.349 | 3.6    |
| 3     | 1992.231  | 6.640 | 3.2    | 42    | 401.429   | 1.338 | 3.7    |
| 4     | 1989.759  | 6.631 | 4.6    | 43    | 394.287   | 1.314 | 4.3    |
| 5     | 1979.595  | 6.598 | 8.1    | 44    | 390.441   | 1.301 | 5.0    |
| 6     | 1115.930  | 3.719 | 50.0   | 45    | 384.947   | 1.283 | 2.4    |
| 7     | 1088.735  | 3.629 | 2.8    | 46    | 376.706   | 1.255 | 4.2    |
| 8     | 1079.944  | 3.599 | 3.7    | 47    | 372.586   | 1.242 | 3.7    |
| 9     | 1072.253  | 3.574 | 2.8    | 48    | 371.762   | 1.239 | 3.6    |
| 10    | 895.619   | 2.985 | 1.9    | 49    | 365.443   | 1.218 | 3.7    |
| 11    | 889.026   | 2.963 | 2.0    | 50    | 358.301   | 1.194 | 2.1    |
| 12    | 879.412   | 2.931 | 2.4    | 51    | 357.477   | 1.191 | 2.0    |
| 13    | 872.819   | 2.909 | 2.4    | 52    | 354.730   | 1.182 | 2.1    |
| 14    | 818.428   | 2.728 | 3.0    | 53    | 343.193   | 1.144 | 2.9    |
| 15    | 808.264   | 2.694 | 3.6    | 54    | 331.380   | 1.104 | 2.5    |
| 16    | 792.606   | 2.642 | 3.3    | 55    | 227.818   | 0.759 | 36.9   |
| 17    | 785.189   | 2.617 | 3.7    |       |           |       |        |
| 18    | 745.357   | 2.484 | 3.1    |       |           |       |        |
| 19    | 742.335   | 2.474 | 3.2    |       |           |       |        |
| 20    | 729.149   | 2.430 | 2.5    |       |           |       |        |
| 21    | 726.128   | 2.420 | 2.5    |       |           |       |        |
| 22    | 643.717   | 2.145 | 5.0    |       |           |       |        |
| 23    | 635.476   | 2.118 | 2.4    |       |           |       |        |
| 24    | 625.037   | 2.083 | 1.7    |       |           |       |        |
| 25    | 600.863   | 2.003 | 4.8    |       |           |       |        |
| 26    | 595.919   | 1.986 | 2.0    |       |           |       |        |
| 27    | 592.897   | 1.976 | 1.9    |       |           |       |        |
| 28    | 587.128   | 1.957 | 2.2    |       |           |       |        |
| 29    | 584.107   | 1.947 | 1.9    |       |           |       |        |
| 30    | 582.184   | 1.940 | 1.9    |       |           |       |        |
| 31    | 581.360   | 1.938 | 2.0    |       |           |       |        |
| 32    | 573.668   | 1.912 | 5.1    |       |           |       |        |
| 33    | 566.526   | 1.888 | 2.2    |       |           |       |        |
| 34    | 561.032   | 1.870 | 5.0    |       |           |       |        |
| 35    | 438.789   | 1.462 | 4.2    |       |           |       |        |
| 36    | 432.196   | 1.440 | 4.1    |       |           |       |        |
| 37    | 425.329   | 1.418 | 4.4    |       |           |       |        |
| 38    | 418.736   | 1.396 | 3.3    |       |           |       |        |
| 39    | 415.165   | 1.384 | 2.3    |       |           |       |        |

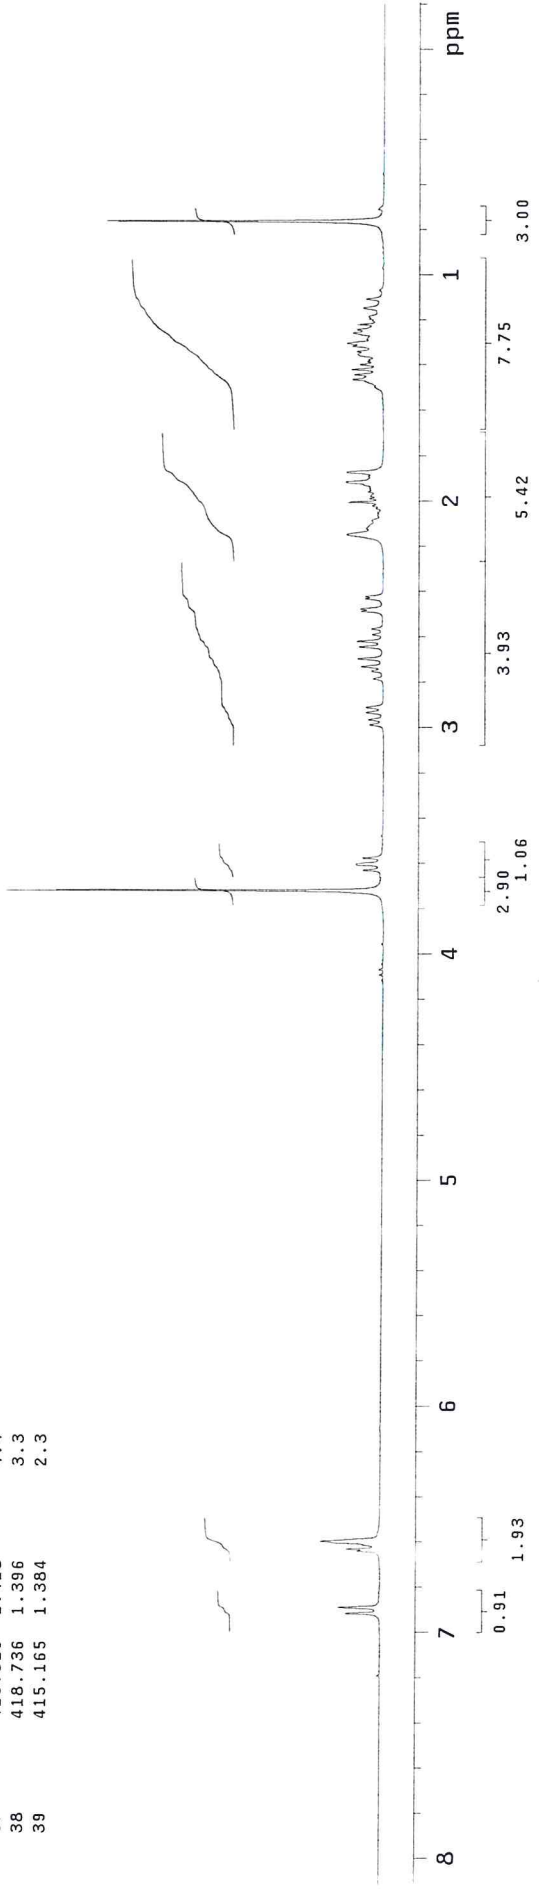

| INDEX | FREQUENCY | PPM     | HEIGHT |
|-------|-----------|---------|--------|
| 1     | 11887.142 | 157.556 | 10.8   |
| 2     | 10385.792 | 137.657 | 18.8   |
| 3     | 9844.115  | 130.477 | 15.1   |
| 4     | 9710.127  | 128.701 | 31.1   |
| 5     | 8577.529  | 113.689 | 28.8   |
| 6     | 8395.443  | 111.276 | 30.3   |
| 7     | 6265.381  | 83.043  | 35.4   |
| 8     | 5858.837  | 77.855  | 5.9    |
| 9     | 5826.772  | 77.230  | 6.8    |
| 10    | 5794.706  | 76.805  | 6.8    |
| 11    | 4167.384  | 55.236  | 27.0   |
| 12    | 3455.073  | 45.795  | 32.4   |
| 13    | 3237.486  | 42.911  | 34.0   |
| 14    | 3208.856  | 42.531  | 25.3   |
| 15    | 2754.214  | 36.505  | 32.8   |
| 16    | 2704.971  | 35.853  | 36.2   |
| 17    | 2507.997  | 33.242  | 29.5   |
| 18    | 2482.803  | 32.908  | 28.6   |
| 19    | 2282.394  | 30.252  | 30.0   |
| 20    | 2254.909  | 29.887  | 34.0   |
| 21    | 1930.819  | 25.592  | 36.7   |
| 22    | 1039.857  | 13.783  | 28.0   |

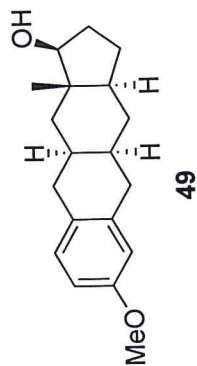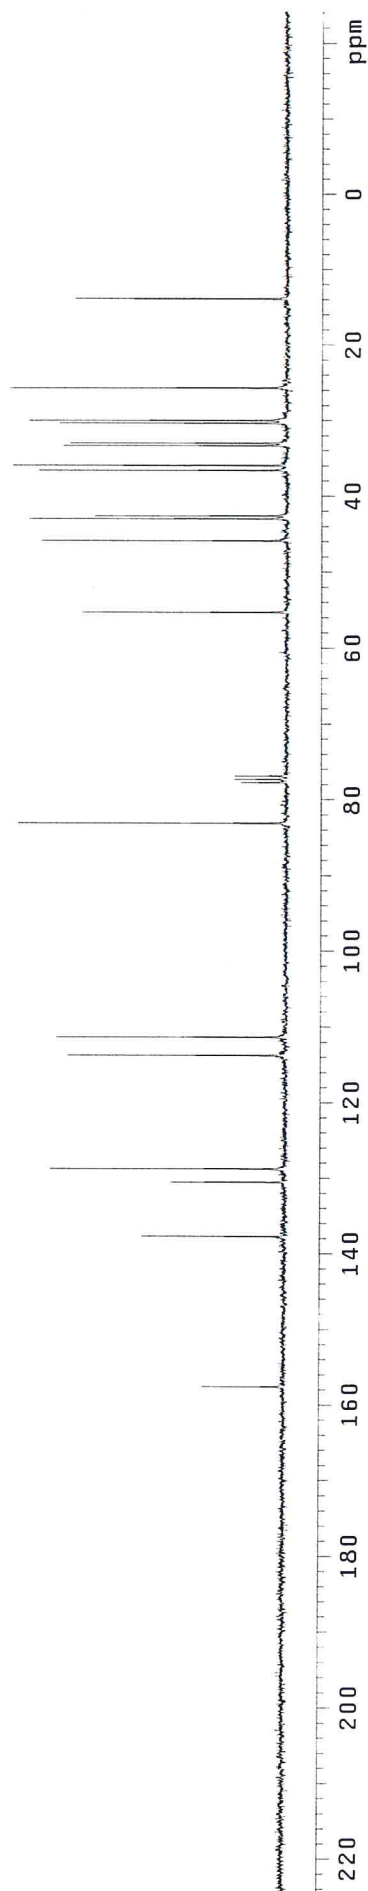

| INDEX | FREQUENCY | PPM   | HEIGHT |
|-------|-----------|-------|--------|
| 1     | 1739.074  | 5.796 | 18.5   |
| 2     | 1097.644  | 3.658 | 11.0   |
| 3     | 991.334   | 3.304 | 13.5   |
| 4     | 761.957   | 2.539 | 8.7    |
| 5     | 726.521   | 2.421 | 8.2    |
| 6     | 710.588   | 2.368 | 19.0   |
| 7     | 693.557   | 2.311 | 30.7   |
| 8     | 691.359   | 2.304 | 32.5   |
| 9     | 619.112   | 2.063 | 23.6   |
| 10    | 614.717   | 2.049 | 25.2   |
| 11    | 607.300   | 2.024 | 25.7   |
| 12    | 602.905   | 2.009 | 23.1   |
| 13    | 481.212   | 1.604 | 19.3   |
| 14    | 471.872   | 1.573 | 19.6   |
| 15    | 466.927   | 1.556 | 19.5   |
| 16    | 454.565   | 1.515 | 15.3   |
| 17    | 439.182   | 1.464 | 13.7   |
| 18    | 432.864   | 1.443 | 13.6   |
| 19    | 422.425   | 1.408 | 15.4   |
| 20    | 366.935   | 1.223 | 3.4    |
| 21    | 343.311   | 1.144 | 3.0    |
| 22    | 292.216   | 0.974 | 11.6   |
| 23    | 280.129   | 0.934 | 17.2   |
| 24    | 261.450   | 0.871 | 70.7   |
| 25    | 203.762   | 0.679 | 4.3    |

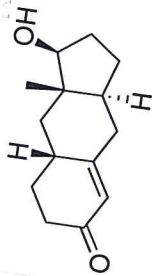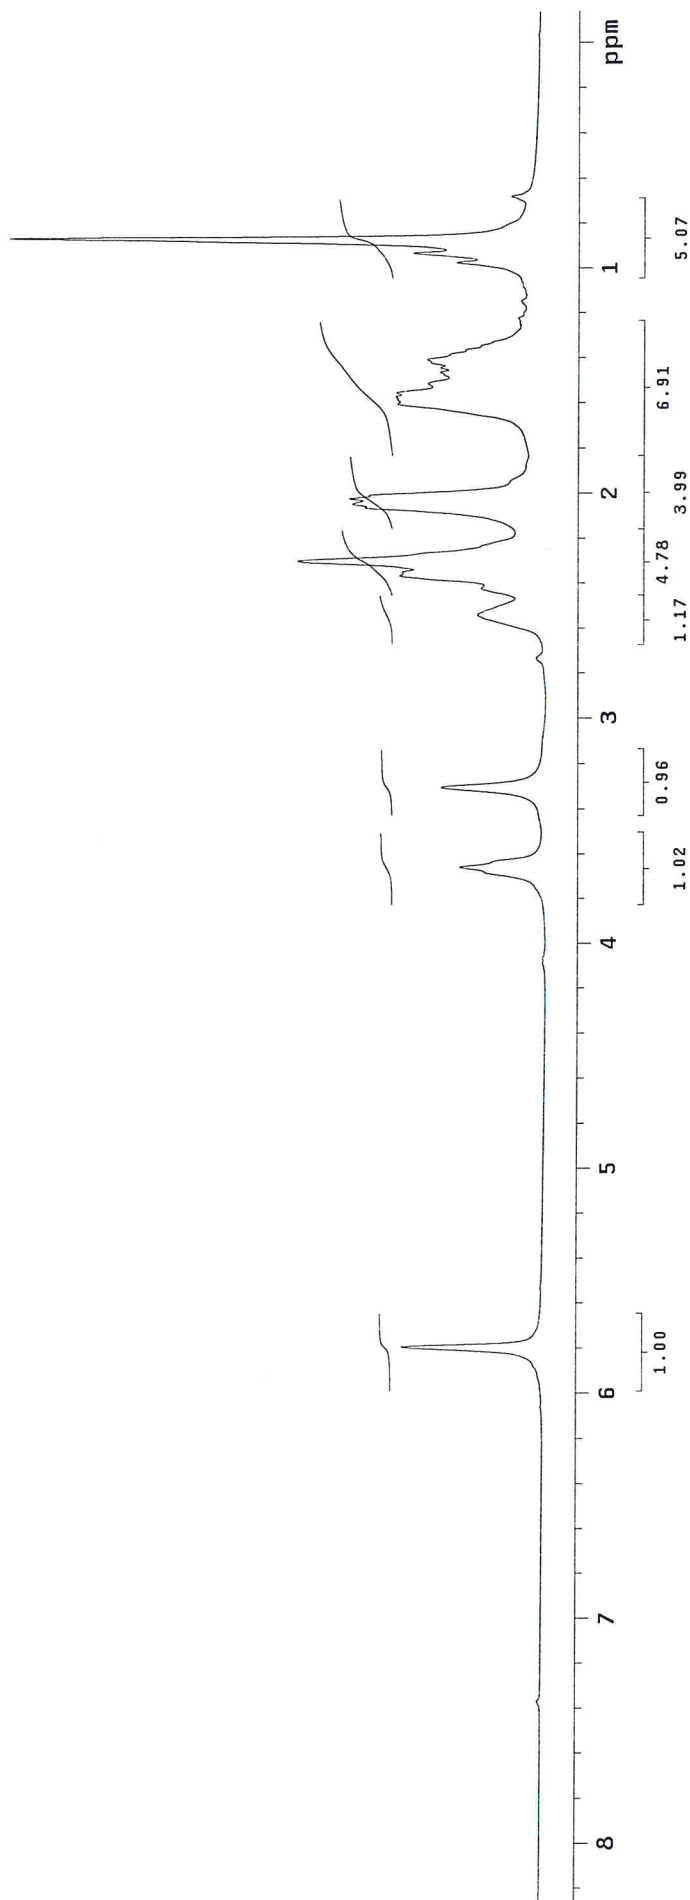

MO 637-2

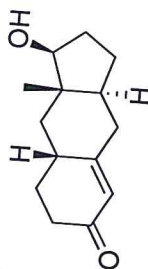

50

| INDEX | FREQUENCY | PPM     | HEIGHT |
|-------|-----------|---------|--------|
| 1     | 15108.576 | 200.254 | 3.3    |
| 2     | 12588.002 | 166.846 | 4.3    |
| 3     | 9462.765  | 125.423 | 20.0   |
| 4     | 6060.392  | 80.326  | 18.4   |
| 5     | 5858.837  | 77.655  | 2.4    |
| 6     | 5825.627  | 77.215  | 2.5    |
| 7     | 5793.561  | 76.790  | 2.7    |
| 8     | 3343.990  | 44.322  | 18.0   |
| 9     | 3331.393  | 44.155  | 18.3   |
| 10    | 3256.955  | 43.169  | 11.3   |
| 11    | 2804.603  | 37.173  | 20.4   |
| 12    | 2691.229  | 35.670  | 21.2   |
| 13    | 2576.709  | 34.153  | 22.4   |
| 14    | 2275.523  | 30.161  | 21.6   |
| 15    | 2269.797  | 30.085  | 24.7   |
| 16    | 1890.737  | 25.060  | 20.4   |
| 17    | 781.044   | 10.352  | 17.8   |

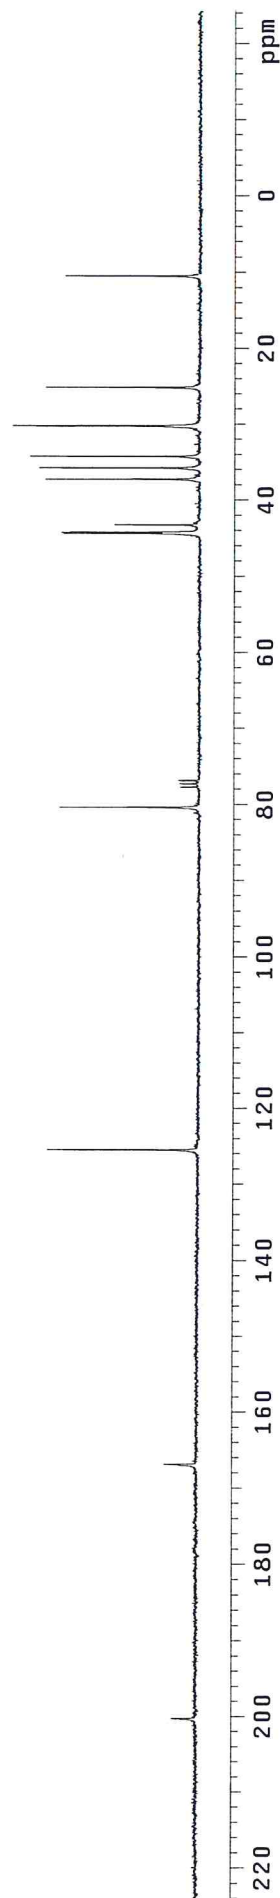



1039

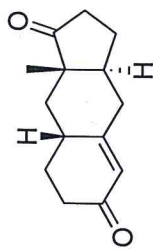

51

| INDEX | FREQUENCY | PPM   | HEIGHT | INDEX | FREQUENCY | PPM   | HEIGHT |
|-------|-----------|-------|--------|-------|-----------|-------|--------|
| 1     | 1737.701  | 5.791 | 15.6   | 40    | 511.704   | 1.705 | 7.4    |
| 2     | 760.035   | 2.533 | 5.1    | 41    | 509.231   | 1.697 | 5.9    |
| 3     | 755.365   | 2.517 | 4.8    | 42    | 500.716   | 1.669 | 9.2    |
| 4     | 744.377   | 2.481 | 9.2    | 43    | 498.793   | 1.662 | 8.3    |
| 5     | 740.256   | 2.467 | 6.3    | 44    | 494.123   | 1.647 | 5.4    |
| 6     | 735.312   | 2.451 | 10.0   | 45    | 492.200   | 1.640 | 6.3    |
| 7     | 729.817   | 2.432 | 16.5   | 46    | 489.178   | 1.630 | 10.0   |
| 8     | 725.148   | 2.417 | 28.3   | 47    | 485.332   | 1.618 | 7.8    |
| 9     | 716.357   | 2.387 | 18.5   | 48    | 480.388   | 1.601 | 8.9    |
| 10    | 708.665   | 2.362 | 9.1    | 49    | 477.366   | 1.591 | 5.1    |
| 11    | 704.820   | 2.349 | 11.4   | 50    | 474.619   | 1.582 | 5.7    |
| 12    | 700.699   | 2.335 | 9.3    | 51    | 469.949   | 1.566 | 5.6    |
| 13    | 694.381   | 2.314 | 7.7    | 52    | 337.542   | 1.125 | 8.3    |
| 14    | 689.436   | 2.298 | 8.1    | 53    | 324.906   | 1.083 | 13.0   |
| 15    | 680.371   | 2.268 | 7.9    | 54    | 312.270   | 1.041 | 7.7    |
| 16    | 677.899   | 2.259 | 4.5    | 55    | 286.173   | 0.954 | 100.0  |
| 17    | 675.426   | 2.251 | 8.4    |       |           |       |        |
| 18    | 673.229   | 2.244 | 4.1    |       |           |       |        |
| 19    | 663.889   | 2.213 | 3.9    |       |           |       |        |
| 20    | 658.944   | 2.196 | 4.5    |       |           |       |        |
| 21    | 648.506   | 2.161 | 5.7    |       |           |       |        |
| 22    | 639.440   | 2.131 | 12.1   |       |           |       |        |
| 23    | 630.650   | 2.102 | 8.3    |       |           |       |        |
| 24    | 622.684   | 2.075 | 5.3    |       |           |       |        |
| 25    | 619.936   | 2.066 | 10.9   |       |           |       |        |
| 26    | 614.992   | 2.050 | 7.5    |       |           |       |        |
| 27    | 610.871   | 2.036 | 7.9    |       |           |       |        |
| 28    | 605.103   | 2.017 | 8.6    |       |           |       |        |
| 29    | 599.334   | 1.997 | 11.6   |       |           |       |        |
| 30    | 592.741   | 1.975 | 10.7   |       |           |       |        |
| 31    | 586.148   | 1.954 | 14.3   |       |           |       |        |
| 32    | 580.105   | 1.933 | 14.1   |       |           |       |        |
| 33    | 571.864   | 1.906 | 4.4    |       |           |       |        |
| 34    | 566.095   | 1.887 | 4.0    |       |           |       |        |
| 35    | 535.878   | 1.786 | 3.9    |       |           |       |        |
| 36    | 529.010   | 1.763 | 5.7    |       |           |       |        |
| 37    | 523.516   | 1.745 | 8.1    |       |           |       |        |
| 38    | 518.297   | 1.727 | 5.1    |       |           |       |        |
| 39    | 516.923   | 1.723 | 5.2    |       |           |       |        |

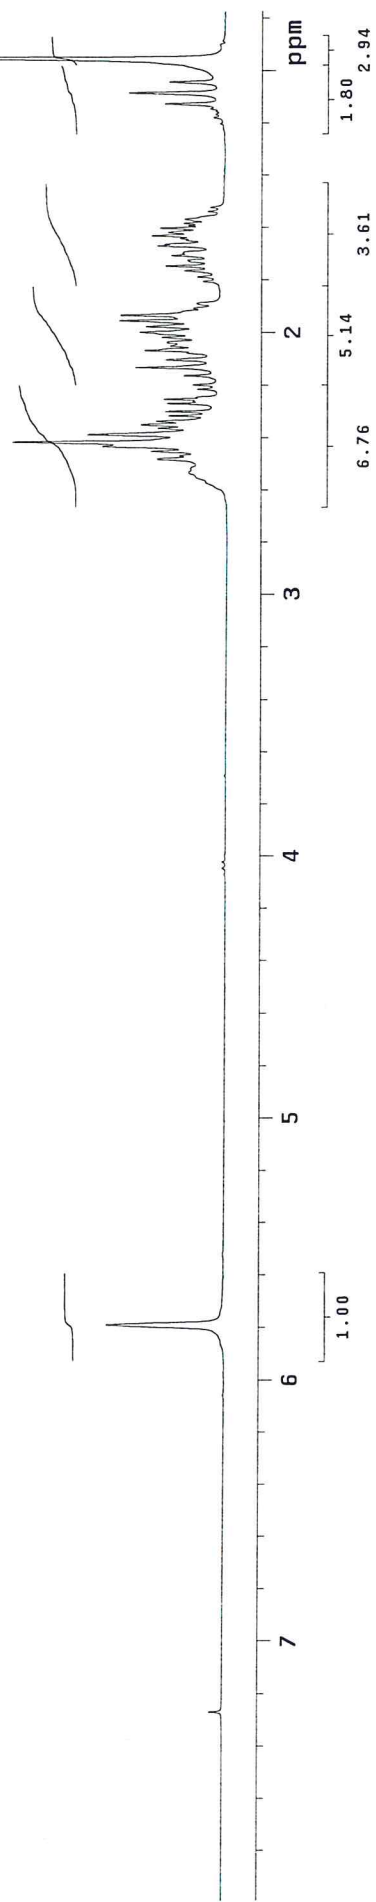

1039

| INDEX | FREQUENCY | PPM     | HEIGHT |
|-------|-----------|---------|--------|
| 1     | 16491.970 | 218.590 | 3.2    |
| 2     | 15046.734 | 199.435 | 4.1    |
| 3     | 12377.285 | 164.053 | 6.2    |
| 4     | 9542.928  | 126.485 | 22.3   |
| 5     | 5856.546  | 77.625  | 7.9    |
| 6     | 5824.481  | 77.200  | 8.3    |
| 7     | 5792.415  | 76.775  | 8.0    |
| 8     | 3599.367  | 47.707  | 8.1    |
| 9     | 3373.764  | 44.717  | 19.9   |
| 10    | 2934.009  | 38.888  | 23.5   |
| 11    | 2813.764  | 37.295  | 24.5   |
| 12    | 2694.664  | 35.716  | 29.7   |
| 13    | 2654.582  | 35.185  | 24.4   |
| 14    | 2559.531  | 33.925  | 25.3   |
| 15    | 2275.522  | 30.161  | 26.7   |
| 16    | 1794.540  | 23.785  | 28.1   |
| 17    | 971.145   | 12.872  | 26.3   |

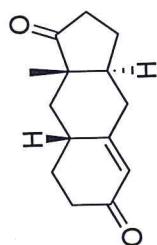

51

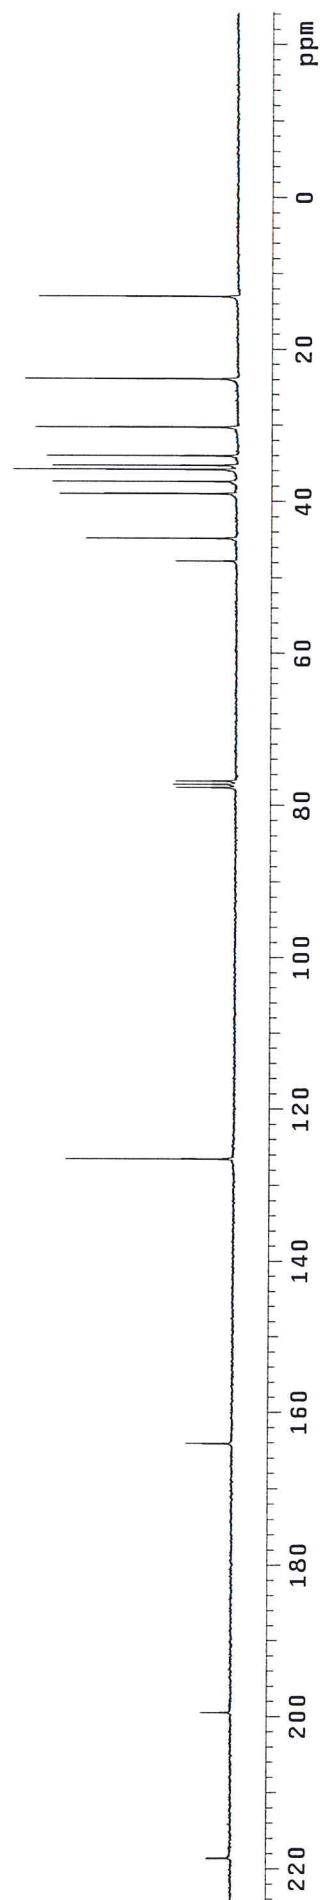

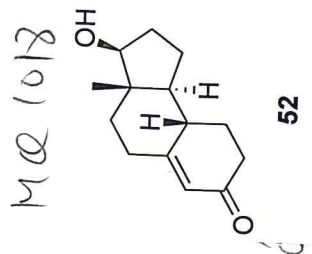

| INDEX | FREQUENCY | PPM   | HEIGHT | INDEX | FREQUENCY | PPM   | HEIGHT | INDEX | FREQUENCY | PPM   | HEIGHT |
|-------|-----------|-------|--------|-------|-----------|-------|--------|-------|-----------|-------|--------|
| 1     | 1758.370  | 5.860 | 32.9   | 40    | 587.863   | 1.959 | 11.5   | 79    | 384.583   | 1.282 | 22.7   |
| 2     | 1237.534  | 4.124 | 7.3    | 41    | 585.940   | 1.953 | 10.7   | 80    | 377.441   | 1.258 | 28.9   |
| 3     | 1230.392  | 4.101 | 7.3    | 42    | 580.996   | 1.936 | 12.2   | 81    | 370.299   | 1.234 | 18.1   |
| 4     | 1115.292  | 3.717 | 13.1   | 43    | 579.347   | 1.931 | 13.2   | 82    | 363.981   | 1.213 | 12.2   |
| 5     | 1106.776  | 3.689 | 23.0   | 44    | 575.227   | 1.917 | 11.6   | 83    | 356.564   | 1.188 | 15.4   |
| 6     | 1097.986  | 3.659 | 11.6   | 45    | 573.853   | 1.913 | 10.3   | 84    | 353.817   | 1.179 | 15.0   |
| 7     | 1066.670  | 3.555 | 8.2    | 46    | 524.132   | 1.747 | 4.0    | 85    | 351.894   | 1.173 | 17.2   |
| 8     | 774.111   | 2.580 | 6.2    | 47    | 520.836   | 1.736 | 4.8    | 86    | 344.752   | 1.149 | 14.9   |
| 9     | 769.991   | 2.566 | 6.0    | 48    | 516.715   | 1.722 | 5.1    | 87    | 340.082   | 1.133 | 9.2    |
| 10    | 760.926   | 2.536 | 5.7    | 49    | 511.771   | 1.706 | 8.9    | 88    | 332.665   | 1.109 | 6.9    |
| 11    | 755.157   | 2.517 | 5.2    | 50    | 508.749   | 1.696 | 8.5    | 89    | 287.613   | 0.959 | 5.0    |
| 12    | 737.027   | 2.456 | 4.9    | 51    | 504.079   | 1.680 | 9.9    | 90    | 276.351   | 0.921 | 200.0  |
| 13    | 733.181   | 2.444 | 9.3    | 52    | 501.057   | 1.670 | 10.9   |       |           |       |        |
| 14    | 729.060   | 2.430 | 16.8   | 53    | 497.211   | 1.657 | 9.1    |       |           |       |        |
| 15    | 721.369   | 2.404 | 22.2   | 54    | 493.366   | 1.644 | 8.7    |       |           |       |        |
| 16    | 716.973   | 2.390 | 25.0   | 55    | 489.794   | 1.632 | 8.7    |       |           |       |        |
| 17    | 713.128   | 2.377 | 23.5   | 56    | 486.773   | 1.622 | 10.1   |       |           |       |        |
| 18    | 705.436   | 2.351 | 26.6   | 57    | 483.476   | 1.611 | 8.9    |       |           |       |        |
| 19    | 700.217   | 2.334 | 19.9   | 58    | 478.532   | 1.595 | 9.3    |       |           |       |        |
| 20    | 690.877   | 2.303 | 17.4   | 59    | 477.158   | 1.590 | 8.4    |       |           |       |        |
| 21    | 688.679   | 2.295 | 9.7    | 60    | 473.862   | 1.579 | 10.1   |       |           |       |        |
| 22    | 685.932   | 2.286 | 15.6   | 61    | 470.016   | 1.566 | 7.1    |       |           |       |        |
| 23    | 684.009   | 2.280 | 8.5    | 62    | 466.170   | 1.554 | 9.3    |       |           |       |        |
| 24    | 674.394   | 2.248 | 6.4    | 63    | 461.775   | 1.539 | 10.9   |       |           |       |        |
| 25    | 669.450   | 2.231 | 6.5    | 64    | 456.006   | 1.520 | 6.9    |       |           |       |        |
| 26    | 645.001   | 2.150 | 3.8    | 65    | 452.160   | 1.507 | 11.3   |       |           |       |        |
| 27    | 640.331   | 2.134 | 7.3    | 66    | 447.765   | 1.492 | 9.1    |       |           |       |        |
| 28    | 636.760   | 2.122 | 12.5   | 67    | 442.820   | 1.476 | 11.9   |       |           |       |        |
| 29    | 632.914   | 2.109 | 18.2   | 68    | 437.601   | 1.458 | 12.6   |       |           |       |        |
| 30    | 630.167   | 2.100 | 17.2   | 69    | 434.030   | 1.447 | 8.5    |       |           |       |        |
| 31    | 627.695   | 2.092 | 15.9   | 70    | 431.558   | 1.438 | 14.6   |       |           |       |        |
| 32    | 624.673   | 2.082 | 17.5   | 71    | 428.261   | 1.427 | 9.6    |       |           |       |        |
| 33    | 621.652   | 2.072 | 16.7   | 72    | 425.789   | 1.419 | 11.8   |       |           |       |        |
| 34    | 619.729   | 2.065 | 17.9   | 73    | 419.471   | 1.398 | 13.5   |       |           |       |        |
| 35    | 616.707   | 2.055 | 17.8   | 74    | 413.702   | 1.379 | 11.6   |       |           |       |        |
| 36    | 613.136   | 2.043 | 43.9   | 75    | 407.384   | 1.358 | 6.3    |       |           |       |        |
| 37    | 609.015   | 2.030 | 8.4    | 76    | 402.988   | 1.343 | 4.2    |       |           |       |        |
| 38    | 593.632   | 1.978 | 10.3   | 77    | 396.945   | 1.323 | 9.2    |       |           |       |        |
| 39    | 591.984   | 1.973 | 11.8   | 78    | 392.000   | 1.306 | 10.2   |       |           |       |        |

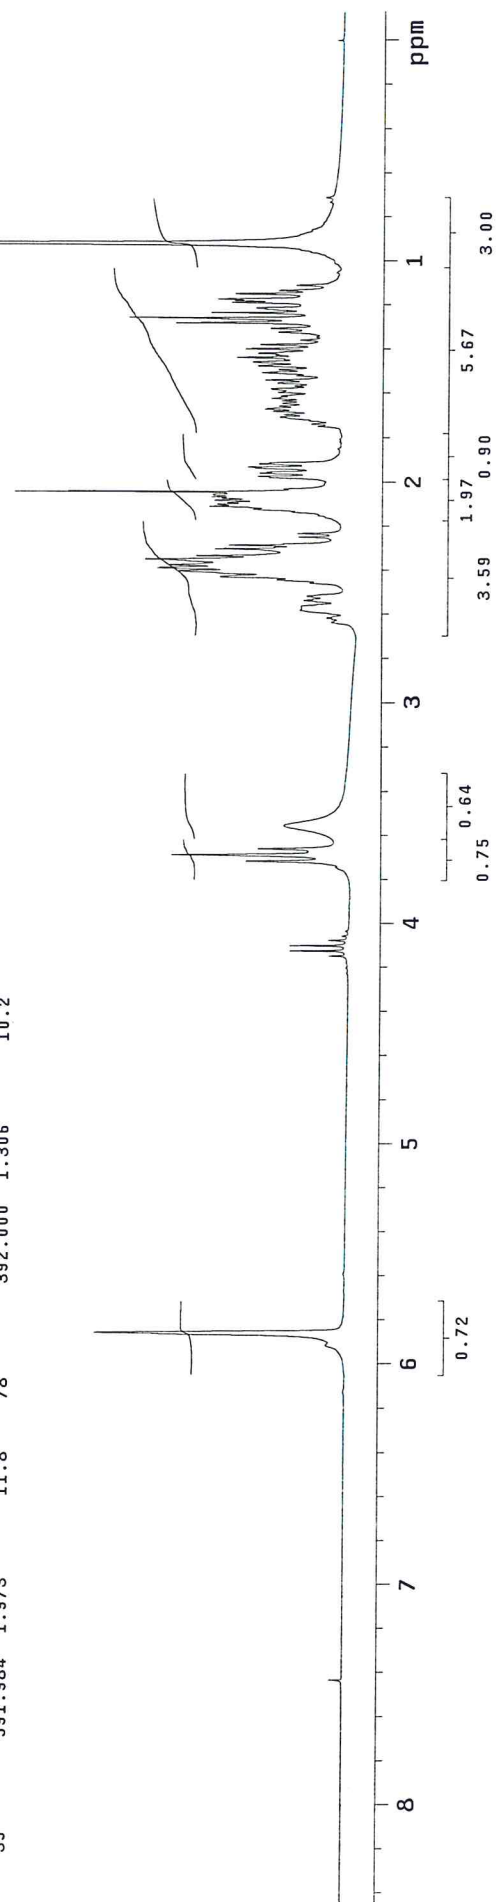

1018

| INDEX | FREQUENCY | PPM     | HEIGHT |
|-------|-----------|---------|--------|
| 1     | 15085.672 | 199.951 | 12.0   |
| 2     | 12605.180 | 167.073 | 14.4   |
| 3     | 9419.248  | 124.846 | 38.9   |
| 4     | 6058.102  | 80.296  | 37.9   |
| 5     | 3802.068  | 50.394  | 31.0   |
| 6     | 3234.051  | 42.865  | 25.0   |
| 7     | 2877.896  | 38.145  | 37.7   |
| 8     | 2757.650  | 36.551  | 32.3   |
| 9     | 2694.664  | 35.716  | 34.9   |
| 10    | 2365.994  | 31.360  | 30.5   |
| 11    | 2259.490  | 29.948  | 37.8   |
| 12    | 2039.613  | 27.034  | 32.6   |
| 13    | 1751.024  | 23.209  | 30.4   |
| 14    | 776.463   | 10.292  | 29.4   |

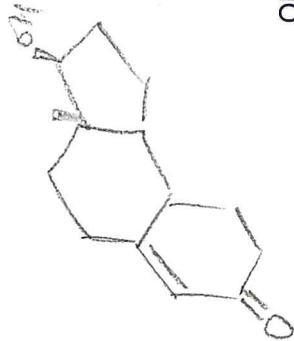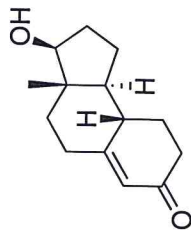

52

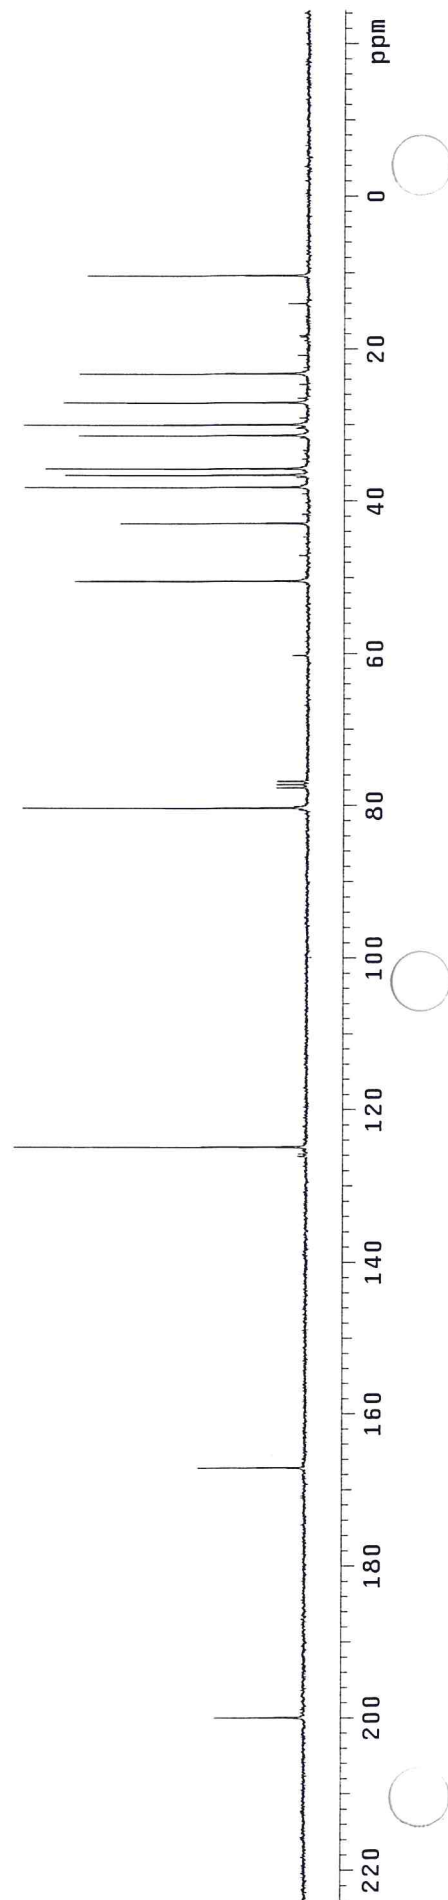

| INDEX | FREQUENCY | PPM   | HEIGHT | INDEX | FREQUENCY | PPM   | HEIGHT |
|-------|-----------|-------|--------|-------|-----------|-------|--------|
| 1     | 1740.448  | 5.801 | 20.2   | 40    | 422.975   | 1.410 | 17.7   |
| 2     | 751.794   | 2.506 | 16.1   | 41    | 416.657   | 1.389 | 17.6   |
| 3     | 742.179   | 2.474 | 20.8   | 42    | 410.339   | 1.368 | 15.6   |
| 4     | 732.290   | 2.441 | 27.2   | 43    | 405.119   | 1.350 | 9.2    |
| 5     | 724.049   | 2.413 | 35.6   | 44    | 397.427   | 1.325 | 6.7    |
| 6     | 710.588   | 2.368 | 18.7   | 45    | 348.805   | 1.162 | 6.2    |
| 7     | 707.017   | 2.356 | 20.5   | 46    | 344.959   | 1.150 | 5.8    |
| 8     | 689.161   | 2.297 | 10.3   | 47    | 338.916   | 1.130 | 6.0    |
| 9     | 684.492   | 2.281 | 11.1   | 48    | 286.173   | 0.954 | 100.0  |
| 10    | 674.602   | 2.248 | 10.7   |       |           |       |        |
| 11    | 669.932   | 2.233 | 12.5   |       |           |       |        |
| 12    | 653.175   | 2.177 | 12.8   |       |           |       |        |
| 13    | 646.308   | 2.154 | 14.7   |       |           |       |        |
| 14    | 637.243   | 2.124 | 19.9   |       |           |       |        |
| 15    | 628.178   | 2.094 | 15.7   |       |           |       |        |
| 16    | 618.288   | 2.061 | 10.5   |       |           |       |        |
| 17    | 609.498   | 2.031 | 15.4   |       |           |       |        |
| 18    | 603.729   | 2.012 | 10.8   |       |           |       |        |
| 19    | 597.411   | 1.991 | 10.6   |       |           |       |        |
| 20    | 591.642   | 1.972 | 10.3   |       |           |       |        |
| 21    | 583.401   | 1.944 | 7.7    |       |           |       |        |
| 22    | 555.931   | 1.853 | 9.7    |       |           |       |        |
| 23    | 550.711   | 1.835 | 9.5    |       |           |       |        |
| 24    | 543.294   | 1.811 | 10.8   |       |           |       |        |
| 25    | 538.625   | 1.795 | 9.5    |       |           |       |        |
| 26    | 504.287   | 1.681 | 4.1    |       |           |       |        |
| 27    | 496.320   | 1.654 | 7.3    |       |           |       |        |
| 28    | 492.749   | 1.642 | 7.9    |       |           |       |        |
| 29    | 483.959   | 1.613 | 12.1   |       |           |       |        |
| 30    | 480.937   | 1.603 | 9.6    |       |           |       |        |
| 31    | 474.894   | 1.583 | 11.8   |       |           |       |        |
| 32    | 472.147   | 1.574 | 11.4   |       |           |       |        |
| 33    | 465.004   | 1.550 | 11.5   |       |           |       |        |
| 34    | 462.532   | 1.542 | 11.0   |       |           |       |        |
| 35    | 454.566   | 1.515 | 8.7    |       |           |       |        |
| 36    | 451.819   | 1.506 | 9.1    |       |           |       |        |
| 37    | 441.380   | 1.471 | 6.7    |       |           |       |        |
| 38    | 435.336   | 1.451 | 10.9   |       |           |       |        |
| 39    | 429.018   | 1.430 | 14.1   |       |           |       |        |

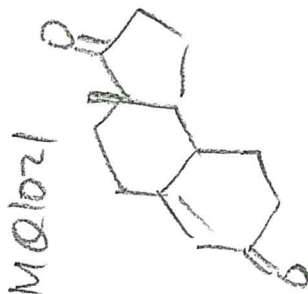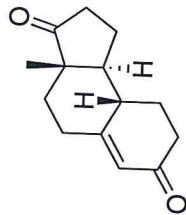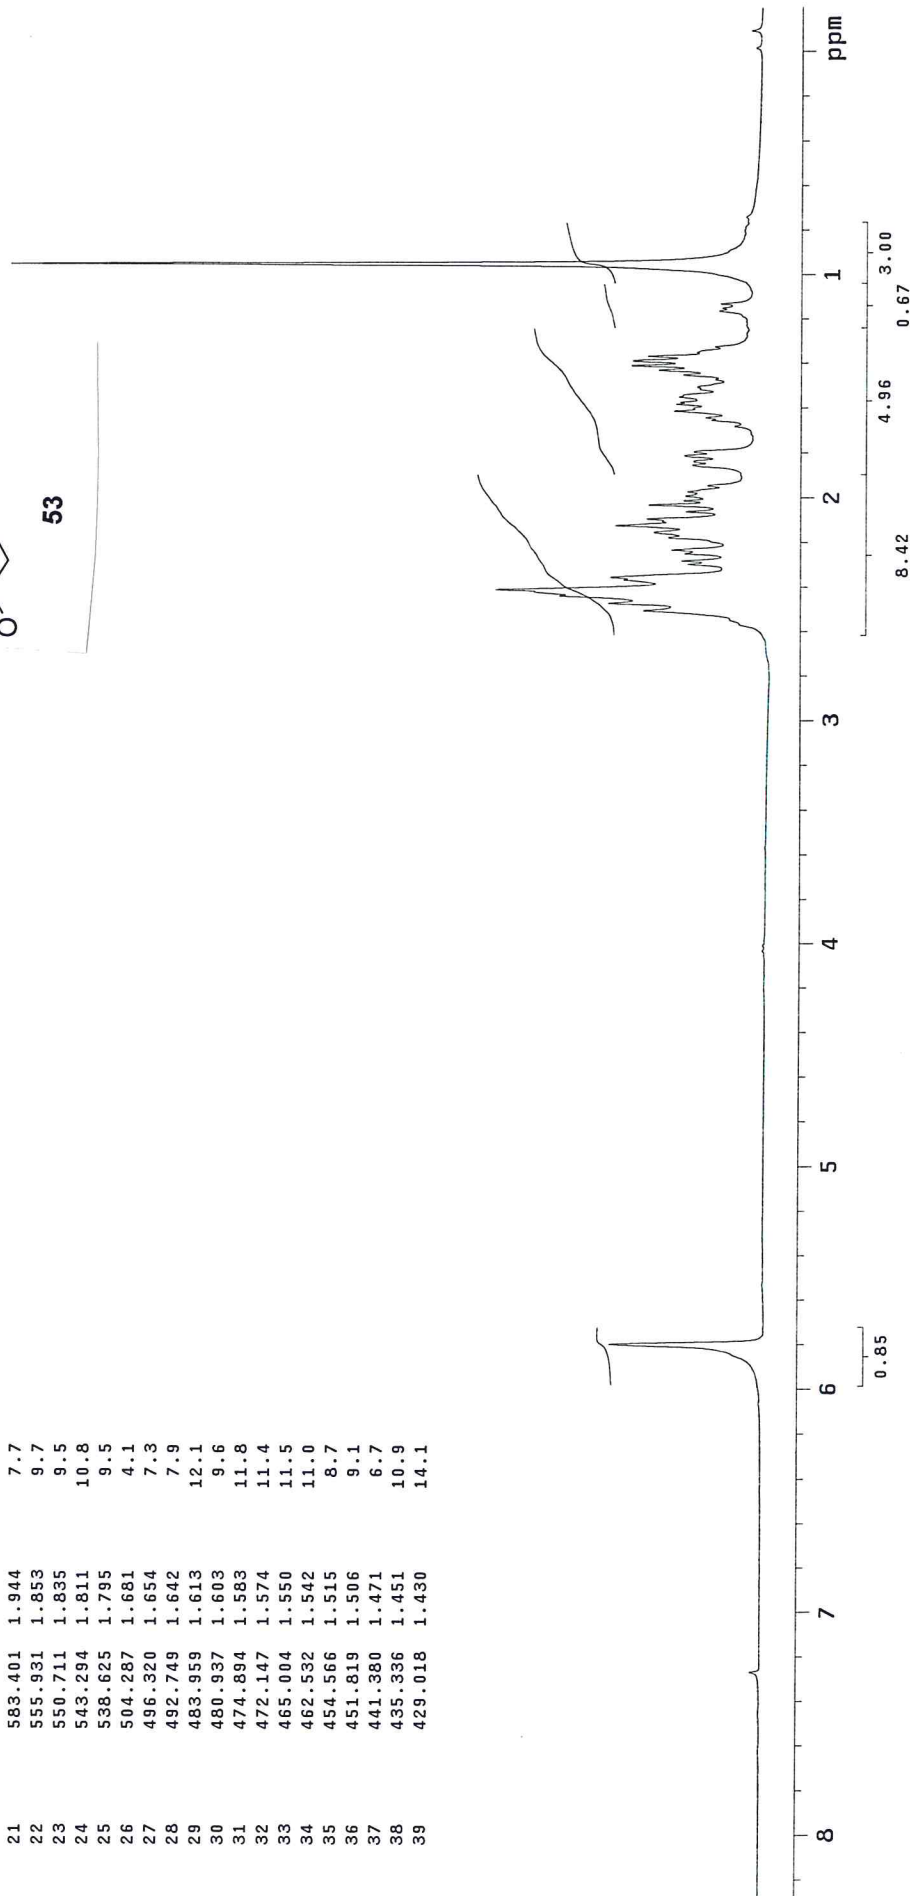

401021

| INDEX | FREQUENCY | PPM     | HEIGHT |
|-------|-----------|---------|--------|
| 1     | 16513.729 | 218.879 | 4.8    |
| 2     | 15016.960 | 199.040 | 5.8    |
| 3     | 12404.770 | 164.417 | 8.6    |
| 4     | 9500.556  | 125.924 | 29.7   |
| 5     | 5857.692  | 77.640  | 5.2    |
| 6     | 5825.626  | 77.215  | 5.9    |
| 7     | 5793.561  | 76.790  | 5.7    |
| 8     | 3818.100  | 50.606  | 29.6   |
| 9     | 3587.916  | 47.555  | 9.3    |
| 10    | 2834.377  | 37.568  | 31.3   |
| 11    | 2762.230  | 36.612  | 33.1   |
| 12    | 2699.244  | 35.777  | 36.0   |
| 13    | 2327.056  | 30.844  | 35.7   |
| 14    | 2321.330  | 30.768  | 31.9   |
| 15    | 2010.982  | 26.654  | 34.0   |
| 16    | 1650.246  | 21.873  | 31.4   |
| 17    | 982.597   | 13.024  | 25.4   |

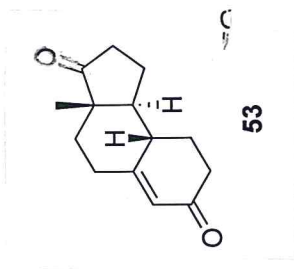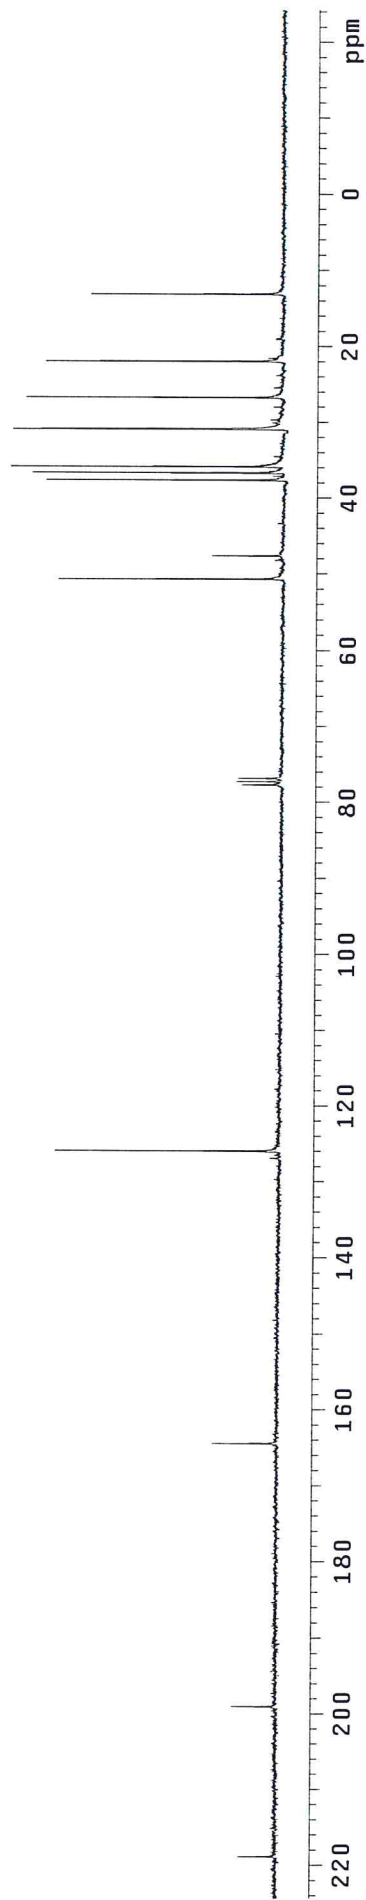



1825

DEPT-135

HEIGHT

PPM

FREQUENCY

INDEX

HEIGHT

PPM

FREQUENCY

INDEX

HEIGHT

PPM

FREQUENCY

INDEX

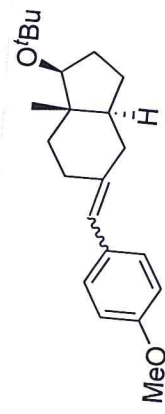

54

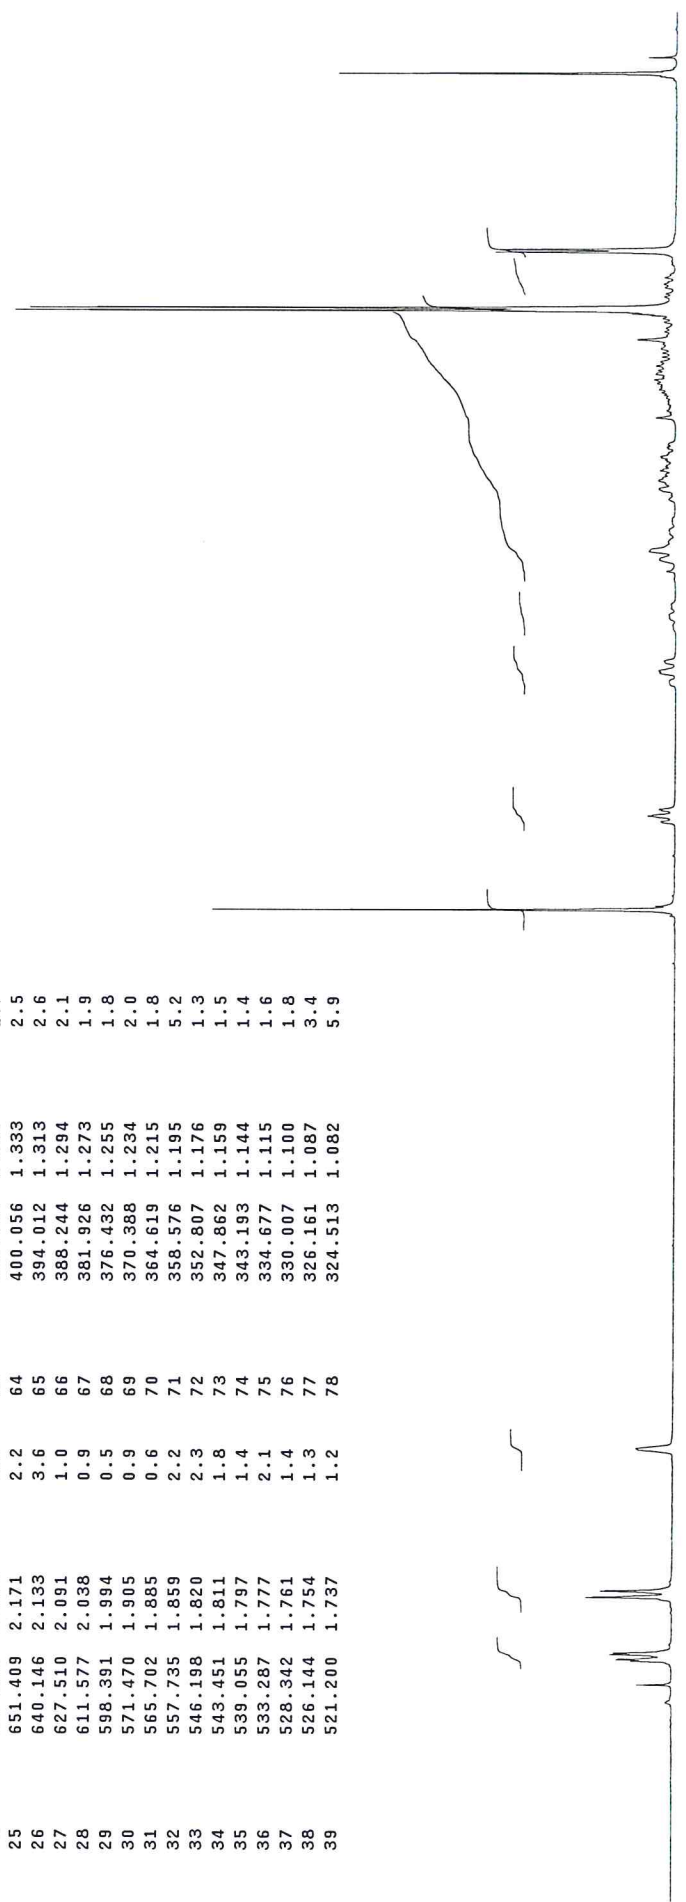

8 7 6 5 4 3 2 1 ppm

8.42 3.16 0.96

11.05

0.42 0.85

3.00

0.90

1.94 1.97



1081

| INDEX | FREQUENCY | PPM     | HEIGHT |
|-------|-----------|---------|--------|
| 1     | 11919.207 | 157.981 | 4.5    |
| 2     | 10678.961 | 141.543 | 4.2    |
| 3     | 10670.944 | 141.436 | 4.6    |
| 4     | 9902.519  | 131.251 | 2.4    |
| 5     | 9887.631  | 131.054 | 2.8    |
| 6     | 9831.516  | 130.310 | 25.9   |
| 7     | 9273.807  | 122.918 | 7.1    |
| 8     | 9257.774  | 122.706 | 9.6    |
| 9     | 8576.383  | 113.674 | 19.9   |
| 10    | 6083.294  | 80.630  | 9.2    |
| 11    | 6077.568  | 80.554  | 9.1    |
| 12    | 5856.545  | 77.625  | 19.1   |
| 13    | 5824.480  | 77.200  | 18.3   |
| 14    | 5792.415  | 76.775  | 17.4   |
| 15    | 5461.453  | 72.388  | 7.1    |
| 16    | 4181.125  | 55.418  | 12.0   |
| 17    | 3489.428  | 46.250  | 8.5    |
| 18    | 3443.620  | 45.643  | 9.6    |
| 19    | 3228.323  | 42.789  | 3.7    |
| 20    | 3223.743  | 42.729  | 3.6    |
| 21    | 2885.910  | 38.251  | 8.0    |
| 22    | 2846.974  | 37.735  | 7.2    |
| 23    | 2838.957  | 37.629  | 9.0    |
| 24    | 2488.528  | 32.984  | 9.8    |
| 25    | 2380.879  | 31.557  | 8.1    |
| 26    | 2370.573  | 31.420  | 8.0    |
| 27    | 2256.053  | 29.902  | 2.4    |
| 28    | 2243.456  | 29.736  | 8.9    |
| 29    | 2183.906  | 28.946  | 41.9   |
| 30    | 1968.609  | 26.093  | 15.7   |
| 31    | 1866.687  | 24.742  | 9.9    |
| 32    | 797.075   | 10.565  | 11.7   |
| 33    | 90.490    | 1.199   | 8.0    |

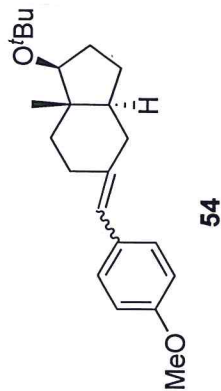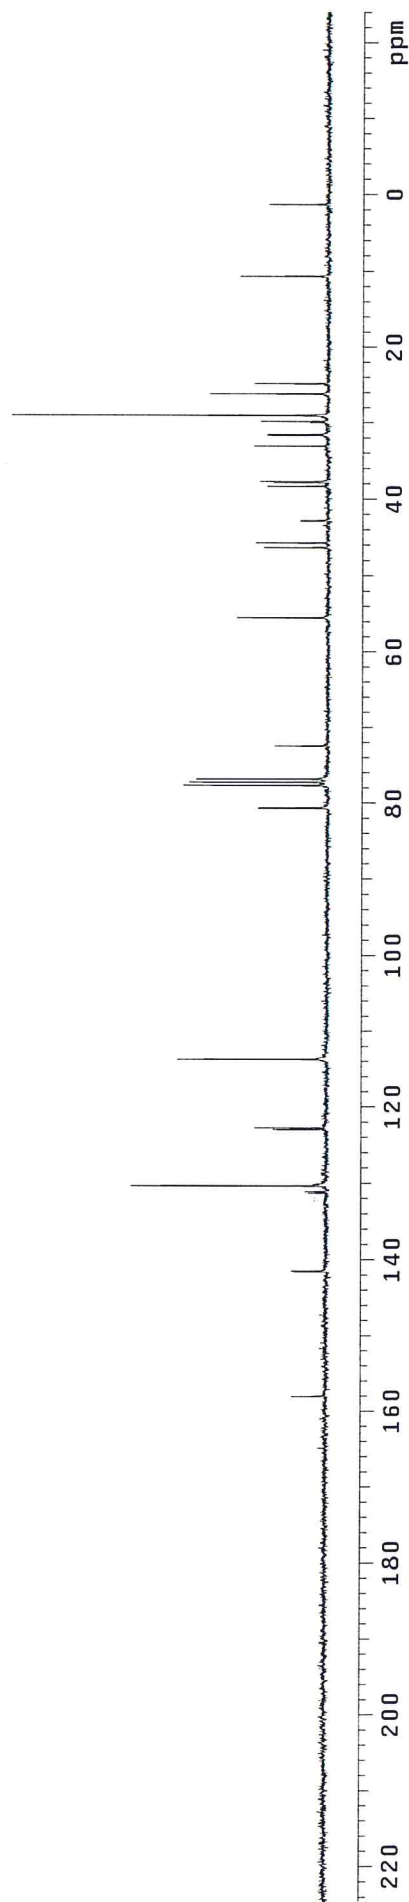

1145

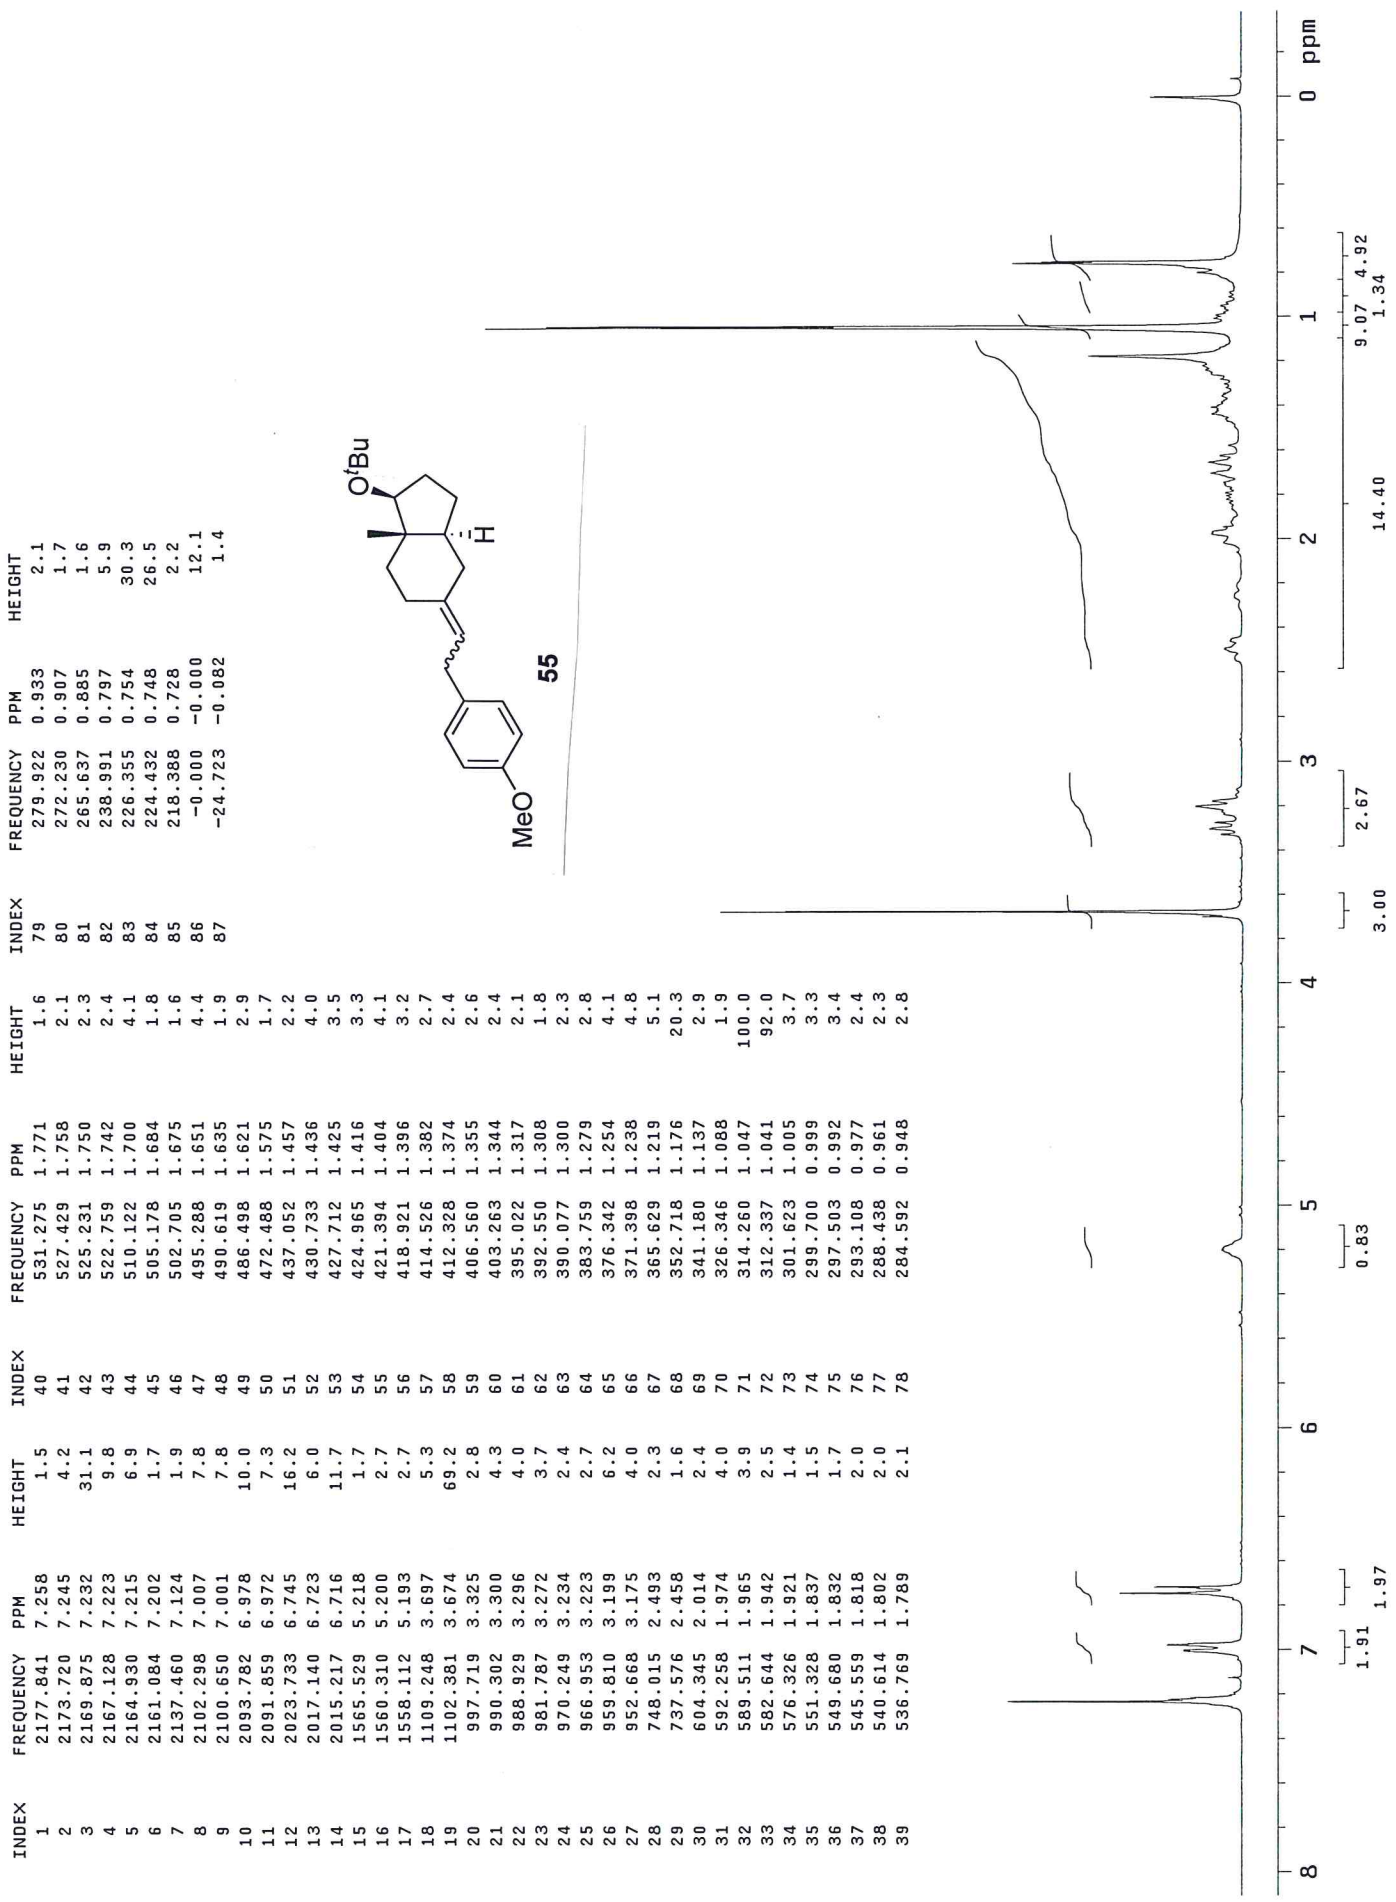

1145

| INDEX | FREQUENCY | PPM     | HEIGHT |
|-------|-----------|---------|--------|
| 1     | 11916.917 | 157.951 | 3.7    |
| 2     | 10541.538 | 139.721 | 5.9    |
| 3     | 10113.235 | 134.044 | 10.7   |
| 4     | 10093.766 | 133.786 | 10.7   |
| 5     | 9758.224  | 129.339 | 28.9   |
| 6     | 9721.578  | 128.853 | 9.6    |
| 7     | 9710.126  | 128.701 | 9.8    |
| 8     | 9703.255  | 128.610 | 8.9    |
| 9     | 9185.627  | 121.749 | 7.4    |
| 10    | 9168.449  | 121.522 | 7.5    |
| 11    | 8601.578  | 114.008 | 29.5   |
| 12    | 6084.440  | 80.645  | 8.1    |
| 13    | 6078.714  | 80.569  | 8.6    |
| 14    | 5857.691  | 77.640  | 7.1    |
| 15    | 5825.626  | 77.215  | 7.4    |
| 16    | 5794.705  | 76.805  | 7.2    |
| 17    | 5458.018  | 72.342  | 7.9    |
| 18    | 4179.981  | 55.403  | 14.7   |
| 19    | 3503.170  | 46.432  | 7.5    |
| 20    | 3455.072  | 45.795  | 9.1    |
| 21    | 3246.647  | 43.032  | 6.1    |
| 22    | 2895.072  | 38.372  | 7.0    |
| 23    | 2851.555  | 37.795  | 7.9    |
| 24    | 2802.311  | 37.143  | 9.8    |
| 25    | 2488.528  | 32.984  | 9.2    |
| 26    | 2473.640  | 32.786  | 8.7    |
| 27    | 2454.172  | 32.528  | 10.3   |
| 28    | 2382.025  | 31.572  | 9.7    |
| 29    | 2376.299  | 31.496  | 8.7    |
| 30    | 2254.908  | 29.887  | 6.2    |
| 31    | 2182.761  | 28.931  | 50.0   |
| 32    | 2161.002  | 28.643  | 11.2   |
| 33    | 1973.190  | 26.153  | 10.5   |
| 34    | 1962.884  | 26.017  | 10.4   |
| 35    | 1803.701  | 23.907  | 9.6    |
| 36    | 797.075   | 10.565  | 8.2    |
| 37    | 793.640   | 10.519  | 8.0    |

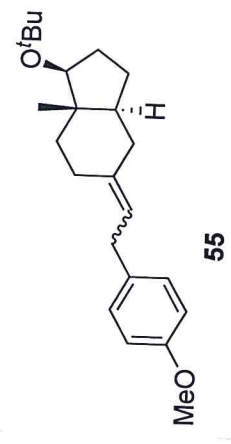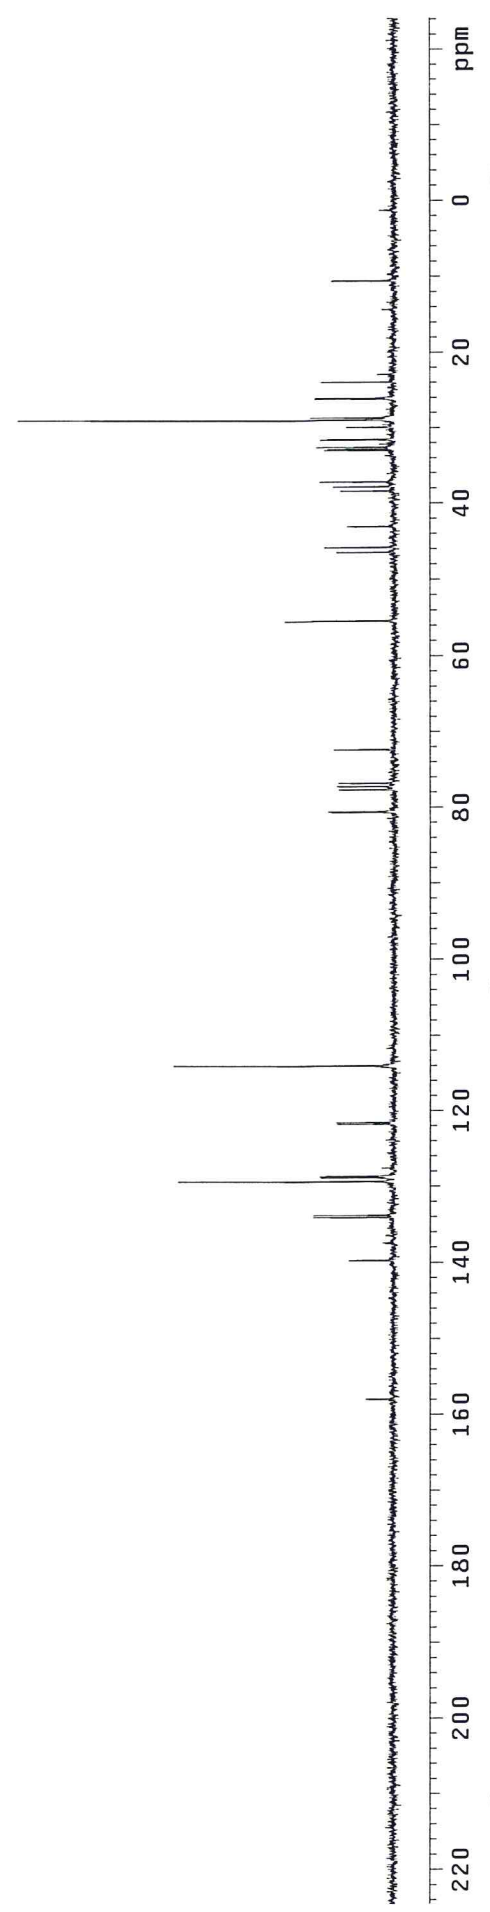

## STANDARD 1H OBSERVE

exp1 std1h

SAMPLE  
 date Oct 16 2008  
 solvent CDCl3  
 file exp  
 ACQUISITION  
 sfrq 300.049  
 tn H1  
 at 1.998  
 np 17984  
 sw 4500.5  
 fb 2600  
 bs 16  
 tpwr 49  
 pw 7.0  
 d1 1.000  
 tof 0  
 nt 8  
 ct 8  
 alock not used  
 gain n  
 FLAGS  
 il n  
 in n  
 dp y  
 sp -67.9  
 wp 2492.1  
 vs 100  
 sc 0  
 wc 250  
 hzmm 9.97  
 is 1912.78  
 rfl 782.1  
 rfp 0  
 th 1  
 ins 3.000  
 nm cdc ph

DEC. & VT  
 dfrq 300.049  
 dn H1  
 dpwr 30  
 dof 0  
 dm nnn  
 dmm c  
 dmf 200  
 wtfile  
 proc  
 fn not used  
 werr  
 wexp  
 wbs  
 wnt

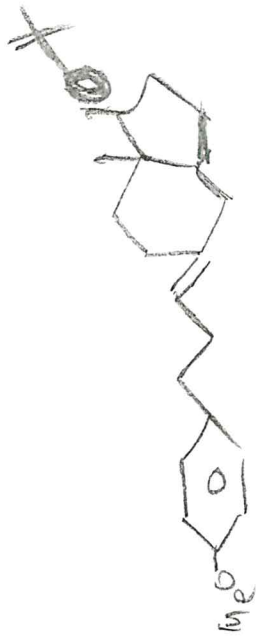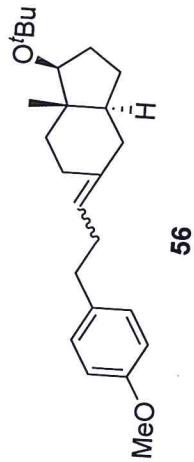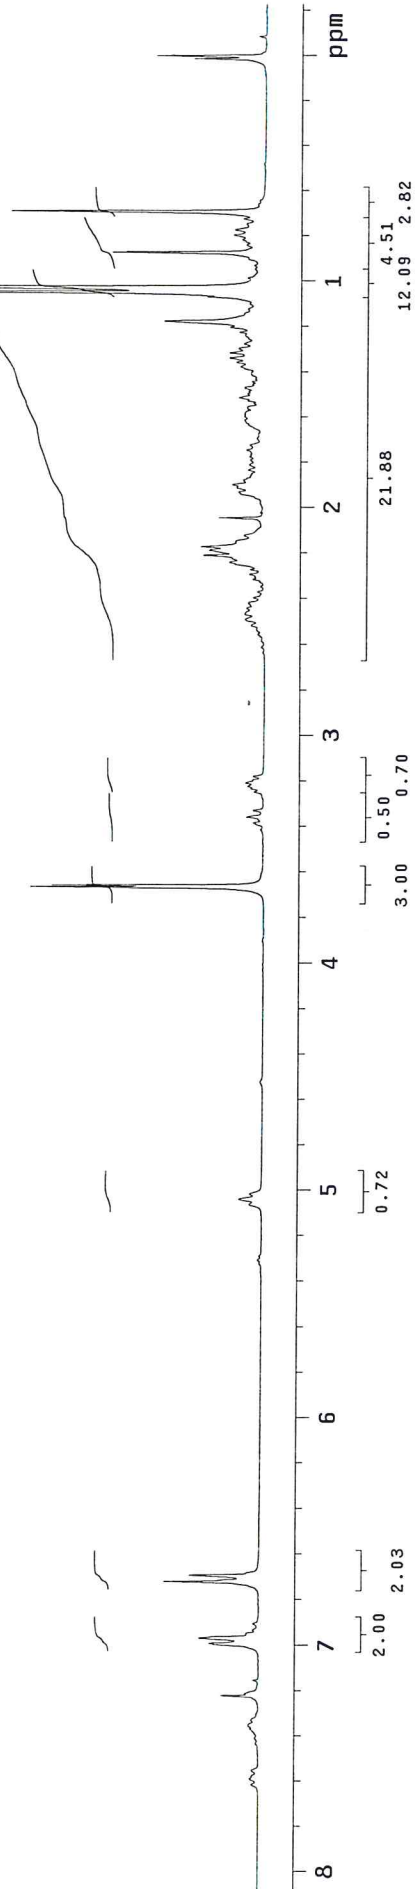

| INDEX | FREQUENCY | PPM     | HEIGHT | INDEX | FREQUENCY | PPM    | HEIGHT |
|-------|-----------|---------|--------|-------|-----------|--------|--------|
| 1     | 11908.901 | 157.845 | 2.8    | 40    | 2248.037  | 29.796 | 4.9    |
| 2     | 10547.264 | 139.797 | 4.9    | 41    | 2237.731  | 29.660 | 5.5    |
| 3     | 10533.522 | 139.615 | 4.2    | 42    | 2225.134  | 29.493 | 8.8    |
| 4     | 10143.010 | 134.439 | 4.8    | 43    | 2173.600  | 28.810 | 55.3   |
| 5     | 9773.112  | 129.536 | 16.9   | 44    | 2170.164  | 28.764 | 32.9   |
| 6     | 9769.677  | 129.491 | 16.4   | 45    | 2147.260  | 28.461 | 9.6    |
| 7     | 9761.660  | 129.384 | 4.4    | 46    | 1959.448  | 25.971 | 9.7    |
| 8     | 9713.562  | 128.747 | 3.2    | 47    | 1954.868  | 25.910 | 17.4   |
| 9     | 9703.255  | 128.610 | 3.2    | 48    | 1789.960  | 23.725 | 6.1    |
| 10    | 9694.094  | 128.489 | 2.9    | 49    | 783.333   | 10.383 | 11.4   |
| 11    | 9187.918  | 121.780 | 5.7    | 50    | 774.172   | 10.261 | 6.7    |
| 12    | 9163.869  | 121.461 | 6.7    |       |           |        |        |
| 13    | 8583.255  | 113.765 | 3.7    |       |           |        |        |
| 14    | 8575.239  | 113.659 | 21.0   |       |           |        |        |
| 15    | 6074.133  | 80.509  | 5.6    |       |           |        |        |
| 16    | 6067.262  | 80.418  | 7.7    |       |           |        |        |
| 17    | 5996.260  | 79.476  | 6.4    |       |           |        |        |
| 18    | 5857.691  | 77.640  | 5.2    |       |           |        |        |
| 19    | 5825.626  | 77.215  | 5.0    |       |           |        |        |
| 20    | 5793.561  | 76.790  | 5.3    |       |           |        |        |
| 21    | 5470.616  | 72.509  | 3.0    |       |           |        |        |
| 22    | 5443.131  | 72.145  | 6.9    |       |           |        |        |
| 23    | 4165.094  | 55.206  | 10.4   |       |           |        |        |
| 24    | 3489.429  | 46.250  | 6.3    |       |           |        |        |
| 25    | 3418.427  | 45.309  | 8.1    |       |           |        |        |
| 26    | 3370.328  | 44.671  | 6.8    |       |           |        |        |
| 27    | 3240.921  | 42.956  | 8.4    |       |           |        |        |
| 28    | 3230.615  | 42.820  | 7.6    |       |           |        |        |
| 29    | 3177.936  | 42.121  | 2.8    |       |           |        |        |
| 30    | 2895.073  | 38.372  | 7.5    |       |           |        |        |
| 31    | 2824.070  | 37.431  | 11.6   |       |           |        |        |
| 32    | 2794.295  | 37.037  | 7.4    |       |           |        |        |
| 33    | 2684.357  | 35.579  | 7.7    |       |           |        |        |
| 34    | 2679.776  | 35.519  | 9.6    |       |           |        |        |
| 35    | 2664.888  | 35.321  | 7.8    |       |           |        |        |
| 36    | 2448.447  | 32.453  | 9.4    |       |           |        |        |
| 37    | 2406.074  | 31.891  | 8.5    |       |           |        |        |
| 38    | 2372.864  | 31.451  | 8.9    |       |           |        |        |
| 39    | 2368.283  | 31.390  | 6.6    |       |           |        |        |

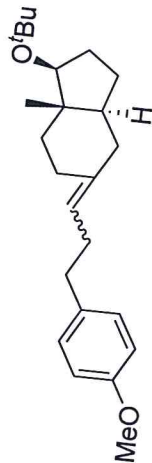

56

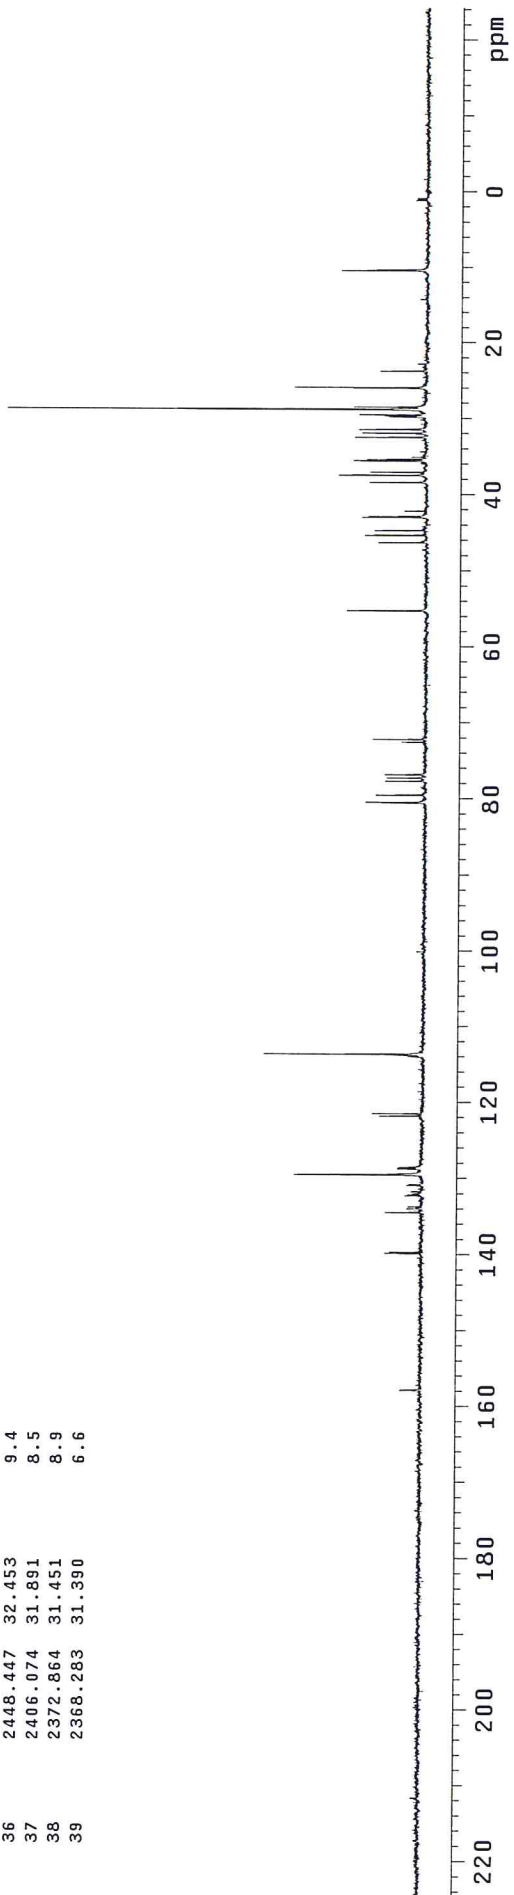

1152

| INDEX | FREQUENCY | PPM   | HEIGHT | INDEX | FREQUENCY | PPM   | HEIGHT |
|-------|-----------|-------|--------|-------|-----------|-------|--------|
| 1     | 2107.725  | 7.025 | 7.6    | 40    | 478.190   | 1.594 | 3.4    |
| 2     | 2105.527  | 7.017 | 12.3   | 41    | 475.718   | 1.585 | 3.4    |
| 3     | 2097.011  | 6.989 | 6.4    | 42    | 466.103   | 1.553 | 3.0    |
| 4     | 2017.073  | 6.723 | 4.6    | 43    | 460.884   | 1.536 | 5.9    |
| 5     | 2014.326  | 6.713 | 4.1    | 44    | 453.742   | 1.512 | 3.1    |
| 6     | 2008.557  | 6.694 | 3.8    | 45    | 449.621   | 1.498 | 4.4    |
| 7     | 2006.085  | 6.686 | 3.4    | 46    | 440.556   | 1.468 | 1.7    |
| 8     | 1150.112  | 3.833 | 50.0   | 47    | 438.083   | 1.460 | 1.5    |
| 9     | 1143.794  | 3.812 | 9.9    | 48    | 429.293   | 1.431 | 2.8    |
| 10    | 1134.179  | 3.780 | 4.4    | 49    | 426.821   | 1.423 | 2.4    |
| 11    | 1126.488  | 3.754 | 3.0    | 50    | 417.755   | 1.392 | 4.6    |
| 12    | 817.448   | 2.724 | 3.4    | 51    | 413.086   | 1.377 | 4.1    |
| 13    | 812.228   | 2.707 | 6.6    | 52    | 406.493   | 1.355 | 2.1    |
| 14    | 806.185   | 2.687 | 4.0    | 53    | 400.449   | 1.335 | 2.5    |
| 15    | 660.043   | 2.200 | 5.6    | 54    | 294.963   | 0.983 | 39.9   |
| 16    | 644.385   | 2.148 | 2.1    | 55    | 257.329   | 0.858 | 3.1    |
| 17    | 640.264   | 2.134 | 2.0    | 56    | 227.661   | 0.759 | 3.0    |
| 18    | 635.595   | 2.118 | 1.9    |       |           |       |        |
| 19    | 631.199   | 2.104 | 1.9    |       |           |       |        |
| 20    | 626.529   | 2.088 | 1.8    |       |           |       |        |
| 21    | 622.409   | 2.074 | 1.6    |       |           |       |        |
| 22    | 608.948   | 2.030 | 1.5    |       |           |       |        |
| 23    | 605.103   | 2.017 | 1.7    |       |           |       |        |
| 24    | 595.213   | 1.984 | 2.7    |       |           |       |        |
| 25    | 591.093   | 1.970 | 3.5    |       |           |       |        |
| 26    | 586.148   | 1.954 | 2.0    |       |           |       |        |
| 27    | 581.203   | 1.937 | 3.3    |       |           |       |        |
| 28    | 577.083   | 1.923 | 4.0    |       |           |       |        |
| 29    | 569.117   | 1.897 | 3.5    |       |           |       |        |
| 30    | 556.755   | 1.856 | 5.5    |       |           |       |        |
| 31    | 543.844   | 1.813 | 4.3    |       |           |       |        |
| 32    | 534.229   | 1.780 | 1.7    |       |           |       |        |
| 33    | 524.340   | 1.748 | 5.1    |       |           |       |        |
| 34    | 519.670   | 1.732 | 4.2    |       |           |       |        |
| 35    | 510.330   | 1.701 | 9.0    |       |           |       |        |
| 36    | 507.034   | 1.690 | 7.3    |       |           |       |        |
| 37    | 498.793   | 1.662 | 4.8    |       |           |       |        |
| 38    | 494.947   | 1.650 | 4.7    |       |           |       |        |
| 39    | 491.101   | 1.637 | 4.7    |       |           |       |        |

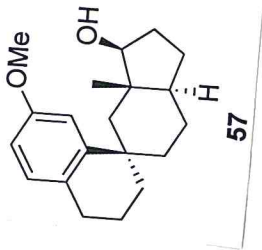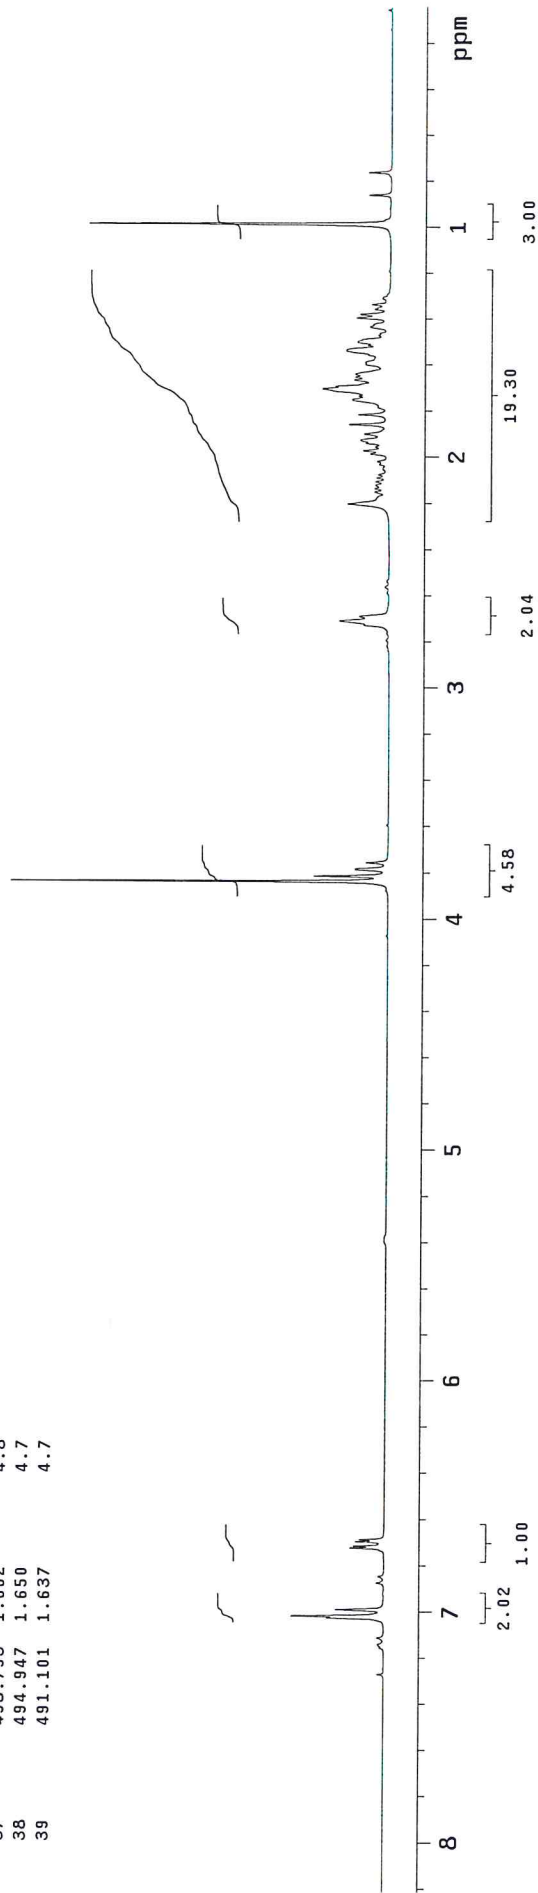



1152.

| INDEX | FREQUENCY | PPM     | HEIGHT |
|-------|-----------|---------|--------|
| 1     | 11908.901 | 157.845 | 8.8    |
| 2     | 11132.459 | 147.553 | 8.2    |
| 3     | 9790.290  | 129.764 | 21.8   |
| 4     | 8547.754  | 113.295 | 16.7   |
| 5     | 8351.926  | 110.699 | 13.6   |
| 6     | 6171.475  | 81.799  | 21.1   |
| 7     | 5856.546  | 77.625  | 6.9    |
| 8     | 5825.626  | 77.215  | 7.1    |
| 9     | 5793.561  | 76.790  | 6.7    |
| 10    | 4173.110  | 55.312  | 16.0   |
| 11    | 3244.357  | 43.002  | 11.9   |
| 12    | 3010.737  | 39.905  | 18.8   |
| 13    | 3001.576  | 39.784  | 21.0   |
| 14    | 2924.848  | 38.767  | 17.5   |
| 15    | 2614.500  | 34.653  | 21.1   |
| 16    | 2514.868  | 33.333  | 19.6   |
| 17    | 2488.529  | 32.984  | 19.2   |
| 18    | 2298.426  | 30.464  | 18.6   |
| 19    | 2286.974  | 30.312  | 19.9   |
| 20    | 1943.416  | 25.759  | 18.4   |
| 21    | 1491.064  | 19.763  | 19.2   |
| 22    | 769.591   | 10.200  | 14.7   |

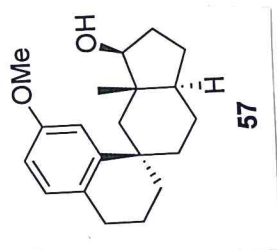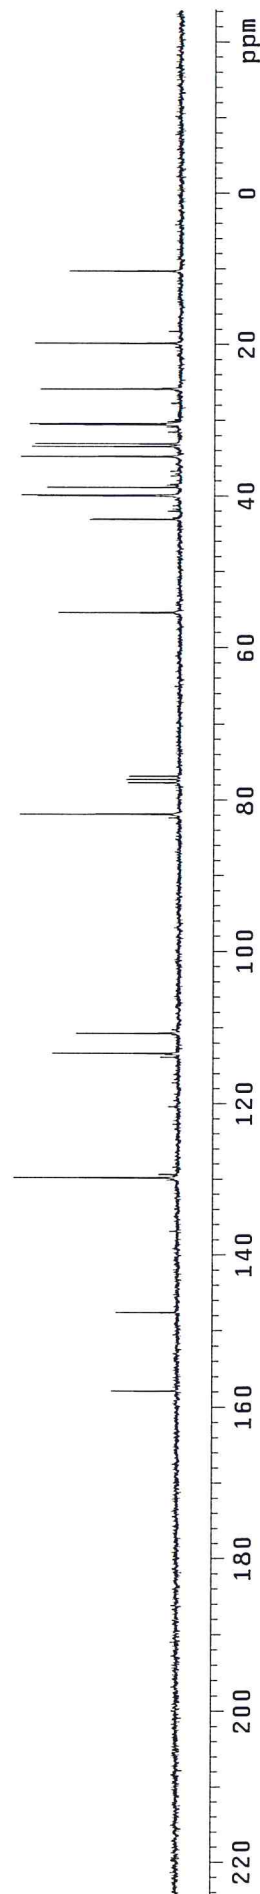



## STANDARD 1H OBSERVE

exp1 stdlh

date 1 2008  
 solvent Aug  
 file CDC13  
 ACQUISITION  
 sfrq 300.049  
 tn 300.049  
 at 1.998  
 np 17984  
 sw 4500.5  
 fb 2600  
 bs 16  
 tpwr 49  
 pw 7.0  
 d1 1.000  
 tof 0  
 nt 8  
 ct 8  
 alock n  
 gain not used  
 flags n  
 in n  
 dp y  
 sp -55.2  
 wp 2486.3  
 vs 50  
 sc 0  
 wc 250  
 hzmm 9.95  
 is 1905.45  
 rfl 752.7  
 rfp 0  
 th 0  
 ins 1  
 nm cdc  
 ph 2.000

DEC. & VT  
 dfrq 300.049  
 dn H1  
 dpwr 30  
 dof 0  
 dm nnn  
 dnm c  
 dmf 200  
 wtfile PROCESSING  
 proc ft  
 fn not used

werr  
 wexp  
 wbs  
 wnt

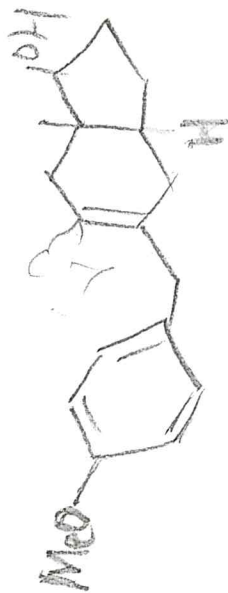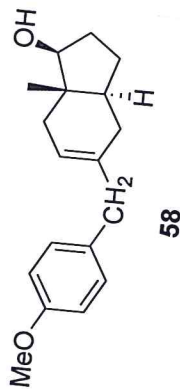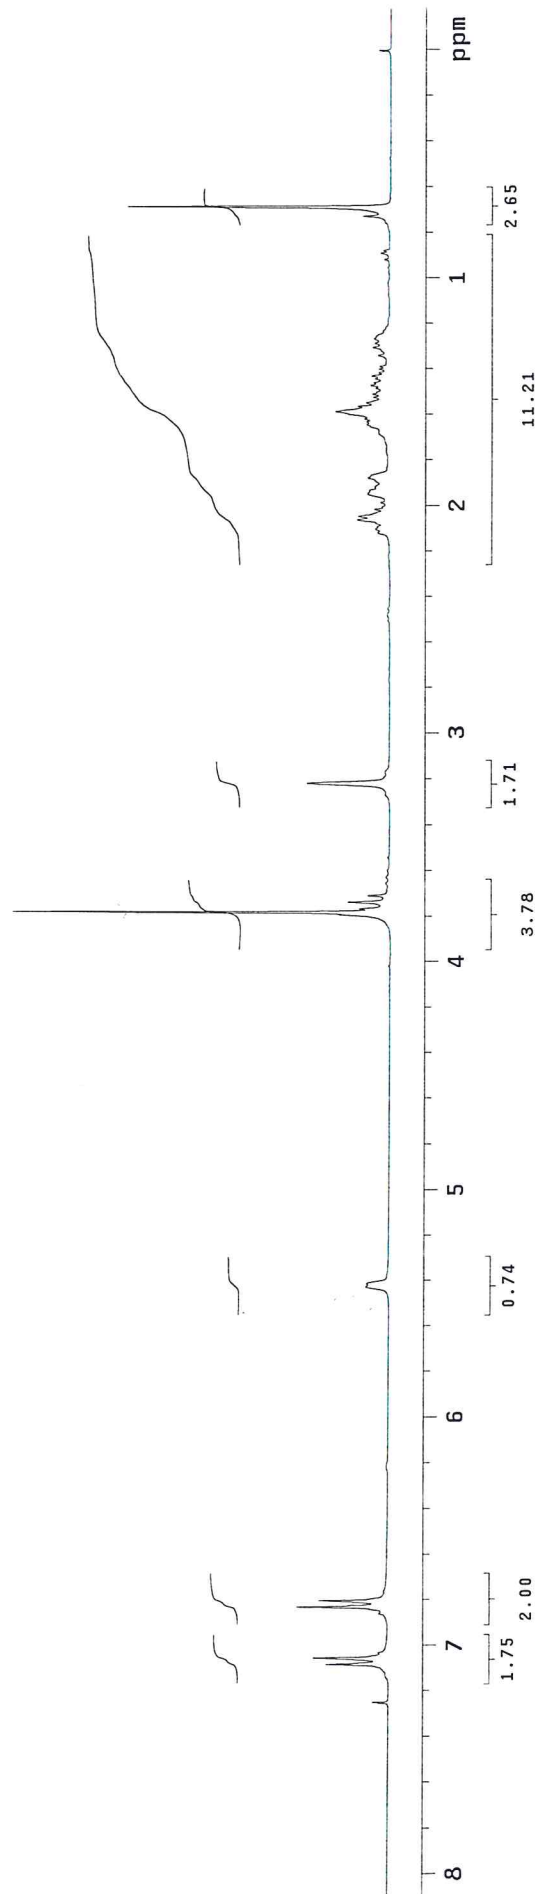

| INDEX | FREQUENCY | PPM     | HEIGHT |
|-------|-----------|---------|--------|
| 1     | 11924.933 | 158.057 | 3.2    |
| 2     | 10334.257 | 136.974 | 7.3    |
| 3     | 10004.441 | 132.602 | 6.7    |
| 4     | 9791.435  | 129.779 | 25.7   |
| 5     | 9193.643  | 121.856 | 13.9   |
| 6     | 8587.835  | 113.826 | 23.8   |
| 7     | 6180.636  | 81.920  | 15.0   |
| 8     | 5857.691  | 77.640  | 8.4    |
| 9     | 5825.626  | 77.215  | 8.5    |
| 10    | 5793.560  | 76.790  | 8.5    |
| 11    | 4177.690  | 55.373  | 12.7   |
| 12    | 3279.858  | 43.472  | 13.8   |
| 13    | 3145.870  | 41.696  | 7.3    |
| 14    | 3117.240  | 41.317  | 11.6   |
| 15    | 2899.653  | 38.433  | 14.5   |
| 16    | 2351.105  | 31.162  | 16.4   |
| 17    | 2332.781  | 30.919  | 15.4   |
| 18    | 1933.108  | 25.622  | 18.6   |
| 19    | 775.317   | 10.276  | 15.4   |

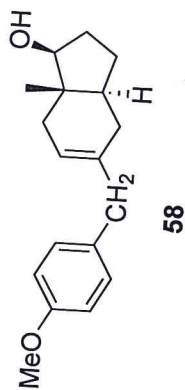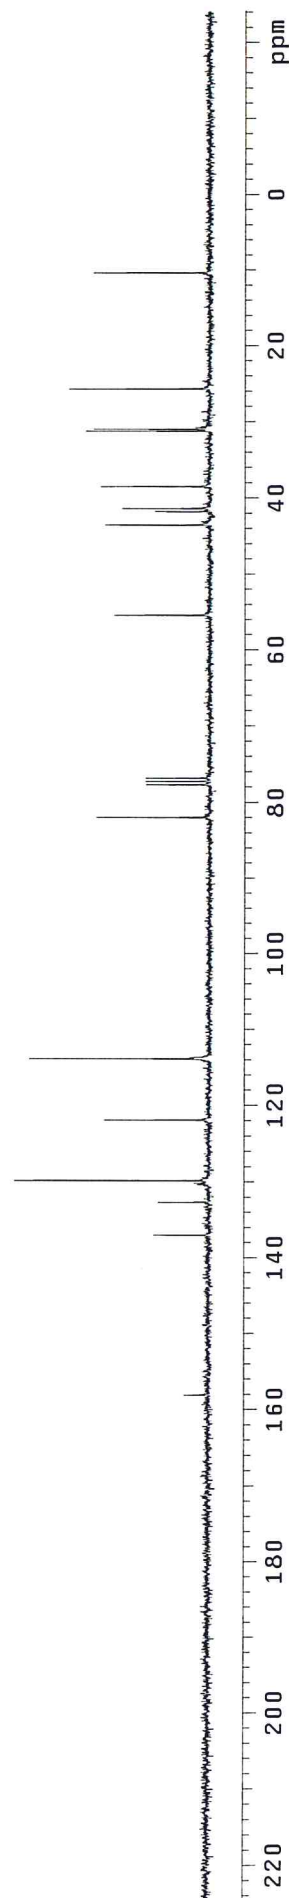

1746

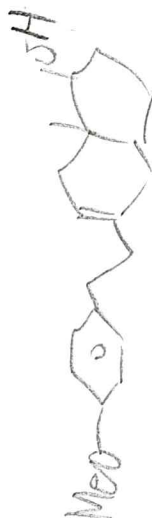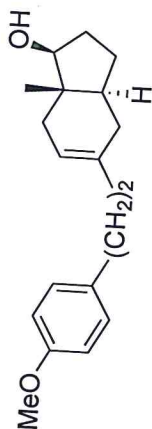

59

| INDEX | FREQUENCY | PPM   | HEIGHT | INDEX | FREQUENCY | PPM   | HEIGHT |
|-------|-----------|-------|--------|-------|-----------|-------|--------|
| 1     | 2135.537  | 7.117 | 2.9    | 40    | 495.014   | 1.650 | 3.9    |
| 2     | 2127.021  | 7.089 | 18.7   | 41    | 493.091   | 1.643 | 4.1    |
| 3     | 2118.505  | 7.061 | 18.7   | 42    | 491.443   | 1.638 | 3.6    |
| 4     | 2049.005  | 6.829 | 7.2    | 43    | 486.223   | 1.620 | 3.1    |
| 5     | 2045.984  | 6.819 | 23.2   | 44    | 482.652   | 1.609 | 4.8    |
| 6     | 2037.468  | 6.790 | 17.1   | 45    | 477.982   | 1.593 | 2.9    |
| 7     | 1600.691  | 5.335 | 6.3    | 46    | 472.488   | 1.575 | 4.9    |
| 8     | 1596.571  | 5.321 | 5.8    | 47    | 467.269   | 1.557 | 4.5    |
| 9     | 1127.654  | 3.758 | 100.0  | 48    | 465.071   | 1.550 | 3.9    |
| 10    | 1117.215  | 3.723 | 10.4   | 49    | 462.050   | 1.540 | 4.6    |
| 11    | 1108.424  | 3.694 | 5.6    | 50    | 454.083   | 1.513 | 4.1    |
| 12    | 804.329   | 2.681 | 5.0    | 51    | 450.237   | 1.501 | 5.1    |
| 13    | 801.856   | 2.672 | 3.4    | 52    | 446.666   | 1.489 | 3.7    |
| 14    | 796.912   | 2.656 | 10.8   | 53    | 441.722   | 1.472 | 3.8    |
| 15    | 789.495   | 2.631 | 10.7   | 54    | 438.150   | 1.460 | 4.5    |
| 16    | 782.078   | 2.607 | 5.8    | 55    | 433.755   | 1.446 | 2.8    |
| 17    | 676.867   | 2.256 | 8.1    | 56    | 428.811   | 1.429 | 3.1    |
| 18    | 668.900   | 2.229 | 12.1   | 57    | 425.789   | 1.419 | 2.8    |
| 19    | 660.934   | 2.203 | 6.0    | 58    | 421.119   | 1.404 | 3.2    |
| 20    | 629.069   | 2.097 | 3.0    | 59    | 415.899   | 1.386 | 3.1    |
| 21    | 625.223   | 2.084 | 3.9    | 60    | 410.405   | 1.368 | 5.0    |
| 22    | 620.278   | 2.067 | 5.4    | 61    | 404.911   | 1.349 | 4.6    |
| 23    | 615.883   | 2.053 | 7.2    | 62    | 399.143   | 1.330 | 3.9    |
| 24    | 612.037   | 2.040 | 7.7    | 63    | 393.649   | 1.312 | 3.5    |
| 25    | 610.389   | 2.034 | 7.7    | 64    | 378.540   | 1.262 | 20.2   |
| 26    | 607.916   | 2.026 | 13.8   | 65    | 373.046   | 1.243 | 4.2    |
| 27    | 602.972   | 2.010 | 7.0    | 66    | 215.916   | 0.720 | 3.4    |
| 28    | 598.302   | 1.994 | 7.7    | 67    | 203.829   | 0.679 | 64.0   |
| 29    | 593.083   | 1.977 | 8.1    |       |           |       |        |
| 30    | 565.887   | 1.886 | 7.6    |       |           |       |        |
| 31    | 555.174   | 1.850 | 4.6    |       |           |       |        |
| 32    | 545.010   | 1.816 | 7.5    |       |           |       |        |
| 33    | 531.824   | 1.772 | 3.1    |       |           |       |        |
| 34    | 527.154   | 1.757 | 3.2    |       |           |       |        |
| 35    | 523.583   | 1.745 | 2.8    |       |           |       |        |
| 36    | 514.518   | 1.715 | 2.8    |       |           |       |        |
| 37    | 506.277   | 1.687 | 2.8    |       |           |       |        |
| 38    | 502.705   | 1.675 | 4.1    |       |           |       |        |
| 39    | 500.783   | 1.669 | 3.1    |       |           |       |        |

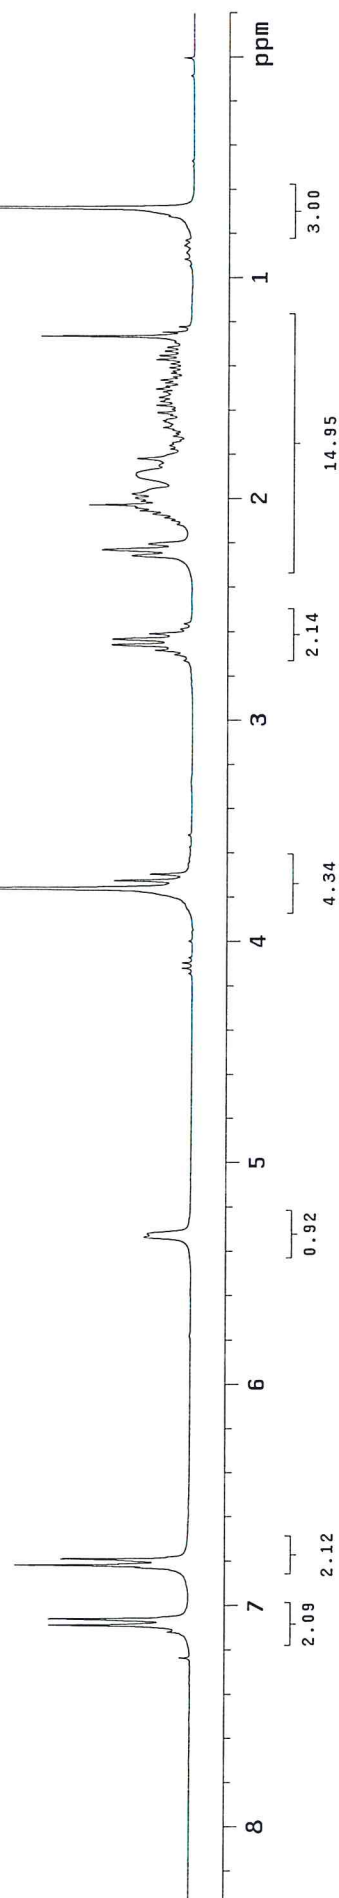

1146

| INDEX | FREQUENCY | PPM     | HEIGHT |
|-------|-----------|---------|--------|
| 1     | 11905.465 | 157.799 | 4.6    |
| 2     | 10307.918 | 136.625 | 11.0   |
| 3     | 10155.607 | 134.606 | 7.2    |
| 4     | 9755.934  | 129.308 | 36.7   |
| 5     | 9098.593  | 120.596 | 16.4   |
| 6     | 8599.288  | 113.978 | 4.8    |
| 7     | 8586.690  | 113.811 | 36.5   |
| 8     | 6176.055  | 81.860  | 17.8   |
| 9     | 5857.691  | 77.640  | 6.3    |
| 10    | 5825.626  | 77.215  | 6.6    |
| 11    | 5793.560  | 76.790  | 5.8    |
| 12    | 4174.255  | 55.327  | 15.8   |
| 13    | 3140.144  | 41.621  | 10.8   |
| 14    | 3110.369  | 41.226  | 17.7   |
| 15    | 3005.011  | 39.829  | 16.2   |
| 16    | 2891.637  | 38.327  | 16.7   |
| 17    | 2552.659  | 33.834  | 19.1   |
| 18    | 2390.042  | 31.678  | 20.6   |
| 19    | 2323.620  | 30.798  | 19.5   |
| 20    | 2217.117  | 29.386  | 4.7    |
| 21    | 1937.690  | 25.683  | 22.2   |
| 22    | 765.010   | 10.140  | 17.4   |

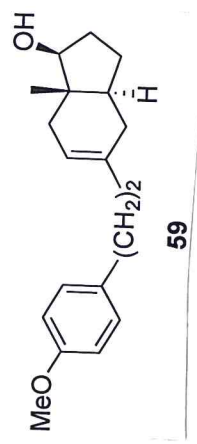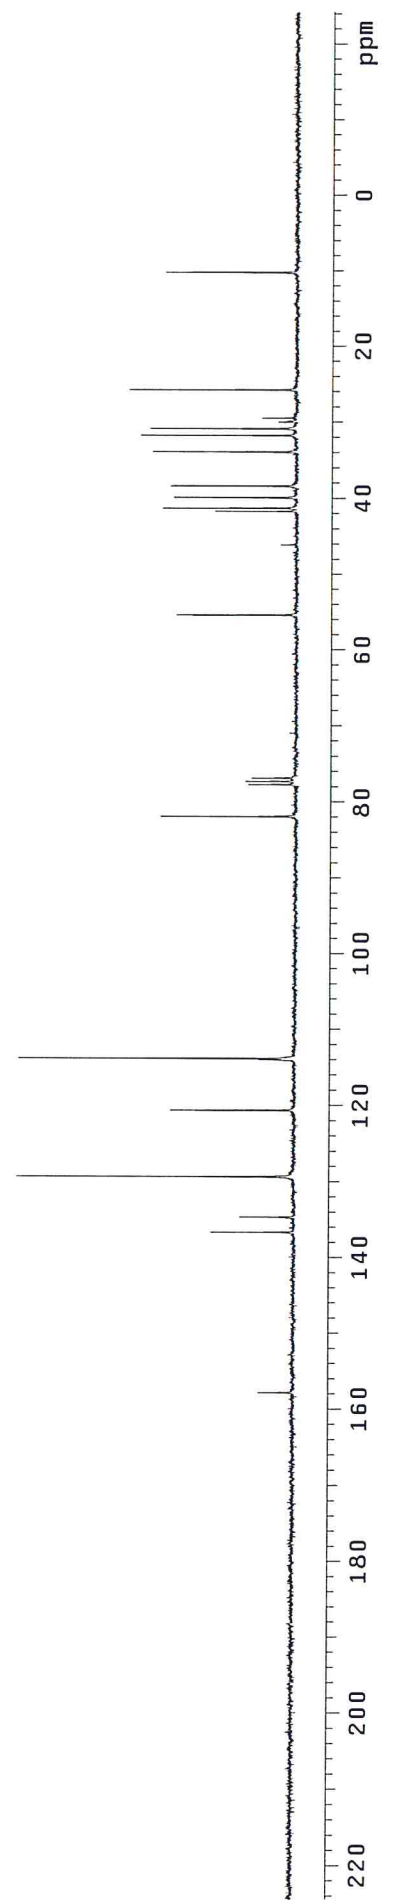

Supplement: c6ob01726f2.pdf [file c6ob01726f2.pdf]
